# Supplementary material for: Meta-Analysis of Genome-Wide Association Studies for Abdominal Aortic Aneurysm Identifies Four New Disease-Specific Risk Loci
Source: Circ Res. 2017 Jan 19;120(2):341–53. doi: 10.1161/CIRCRESAHA.116.308765 (PMC5253231; doi:10.1161/CIRCRESAHA.116.308765)
Supplement: Supplementary file 2 [file res-120-341-s002.pdf]

# SUPPLEMENTAL MATERIAL

Jones et al.: Meta-analysis of genome-wide association studies for abdominal aortic aneurysm  
identifies four new disease specific risk loci

## ONLINE METHODS AND DATA\*

|                                                                      | Page |
|----------------------------------------------------------------------|------|
| Discovery and validation cohort descriptions                         | 2    |
| Meta-analysis                                                        | 9    |
| SNP lookup in GWAS for traits associated with AAA                    | 30   |
| Search for other associated traits and diseases using GWAS databases | 32   |
| PheWAS analysis                                                      | 37   |
| Annotation of AAA associated SNPs using the UCSC Genome Browser      | 38   |
| Pupasuite analysis                                                   | 41   |
| GWAS3D analysis                                                      | 44   |
| DEPICT analysis                                                      | 49   |
| Functional effects of SNPs at AAA loci                               | 60   |
| Validation of GWAS3D results using mRNA expression data              | 67   |
| Look-up for transcription factor binding sites                       | 70   |
| Network analysis                                                     | 72   |
| Consortia contributing data                                          | 76   |
| References                                                           | 79   |

\*for clarity and ease of use each section contains methods, results, figures and tables relevant to that section.

## INDIVIDUAL GWAS STUDIES

All known studies with AAA genome-wide genotyping data were invited to join the International Aneurysm Consortium effort. All studies agreed to participate in the meta-GWAS, with cohort case control descriptions and inclusion/exclusion criteria having been previously reported<sup>1-3</sup> (**Online Table I**). All AAA cases shared a common definition of infra-renal aortic diameter  $\geq 30$  mm. Patients with connective tissue disease associated AAAs (e.g. Marfan, Ehlers-Danlos, Loeys-Dietz) were excluded from the study. Each GWAS was based on a case-control analysis of AAA modelled as a discrete trait. The statistical analysis of the Aneurysm Consortium and New Zealand GWAS datasets was repeated specifically for this study and therefore was harmonized using identical imputation and analysis methods. Data from the remaining cohorts consisted of summary data obtained from previously performed analyses.

The use of the samples in each study cohort was approved by the local Ethics Committees or Institutional Review Boards.

## DISCOVERY AND VALIDATION COHORT DESCRIPTIONS (**Online Tables I and II**)

### a) Discovery Cohorts

**Aneurysm Consortium (AC) AAA GWAS dataset:** The Aneurysm Consortium recruited cases of AAA from centres across the United Kingdom and Western Australia. Cases were defined as an infra-renal aortic diameter  $\geq 30$  mm proven on ultrasound or computerized tomography (CT) scan. Controls were taken from the WTCCC2 common control group<sup>1,4</sup> and were therefore unscreened for AAA.

Data were from 1,866 cases with AAA and 5,435 unscreened controls from the Wellcome Trust Case Control Consortium 2 (WTCCC2) study consisting of samples from the 1958 British Birth Cohort and from the UK National Blood Service. DNA samples were processed at the Wellcome Trust Sanger Institute (WTSI). Genomic DNA was quantified by PicoGreen assay, and quality control (QC) assured by both agarose gel electrophoresis and Sequenom iPLEX genotyping of 29 SNPs and 4 sex-specific markers. Genotyping for the discovery study was performed using Illumina 1.2M (controls) or 670K (AAA) BeadChips. Raw intensity data were normalized using BeadStudio and genotypes were called concurrently from the combined case-control data set using the Illuminus algorithm<sup>5</sup>.

As part of the original Aneurysm Consortium GWAS individual sample QC had been performed as follows. QC was first performed by exclusion of SNPs with call rates  $< 0.98$  and those that demonstrated significant deviation from Hardy-Weinberg equilibrium in the control group ( $P < 5 \times 10^{-4}$ ). Duplicate samples and those that failed genotyping (sample call rates  $< 0.98$ ) were also excluded from further analysis. Genotyping cluster plots for all SNPs with  $P < 1 \times 10^{-4}$  were visually inspected to exclude from further analysis positive associations generated by erroneous genotyping or calling. Checks for population stratification were performed by PLINK<sup>6</sup> identical by state clustering and extreme outliers were removed from the analysis.

Imputation was performed using IMPUTE 2.2 run on the BCISNPmax database platform (version 3.5, BCI Platforms, Espoo, Finland). The reference haplotypes were based on the 1000 Genomes June 2011 release. Imputed calls were filtered by quality score (excluding those  $< 0.9$ ) to restrict to higher quality imputed SNPs.

Following imputation further QC filtering was performed, excluding SNPs with call rates  $< 0.98$  and those that demonstrated significant deviation from Hardy-Weinberg equilibrium in the control group ( $P < 5 \times 10^{-4}$ ). Duplicate samples and those that failed genotyping (sample call rate  $< 0.98$ ) were also excluded from further analysis. Association testing was carried out in PLINK<sup>6</sup>.

**New Zealand (NZ) Vascular Genetics Study AAA GWAS dataset:** The Vascular Research Consortium of New Zealand recruited New Zealand men and women with a proven history of AAA (infra-renal aortic diameter  $\geq 30$  mm proven on ultrasound or CT scan). Approximately 80% had undergone surgical AAA repair (typically AAA's  $> 50$ - $55$  mm in diameter). The vast majority of cases ( $>97\%$ ) were of Anglo-European ancestry. The control group underwent an abdominal ultrasound scan to exclude ( $>25$  mm) concurrent AAA and Anglo-European ancestry was required for inclusion. Controls were also screened for peripheral artery disease (PAD; using ankle brachial index), carotid artery disease (ultrasound) and other cardiovascular risk factors.

Two separate GWAS were performed using New Zealand samples. NZ GWAS 1 consisted of 608 AAA patients (474 male) and 612 elderly controls (450 male), genotyped using the Affymetrix SNP 6 GeneChip array. All samples had call rates  $>0.95$  (mean 0.992). NZ GWAS 2 consisted of 397 AAA patients (332 male) and 384 elderly controls (308 male), genotyped using the Illumina Infinium Omni2.5 BeadChip array. All samples had call rates  $>0.95$  (mean 0.990). All NZ genomic DNA samples exceeded manufacturer's quality and quantity requirements having undergone pre-assessment by Nanophotometer (Implen GmbH, München, Germany) and agarose gel electrophoresis.

Imputation was conducted separately on NZ GWAS 1 and 2 data sets using the same methods as used for the Aneurysm Consortium datasets. IMPUTE 2.2 was run on the BCISNPmax database platform (version 3.5, BCI Platforms, Espoo, Finland). The reference haplotypes were based on the 1000 Genomes June 2011 release. Imputed calls were filtered by quality score (excluding those  $<0.9$ ) to restrict to higher quality imputed SNPs. The genomic inflation factors ( $\lambda$ ) were 1.07 and 1.05, respectively (MAF  $>0.05$ ).

Both NZ GWAS 1 and 2 data sets underwent QC filtering, excluding SNPs with call rates  $< 0.98$  and those that demonstrated significant deviation from Hardy-Weinberg equilibrium in the control group ( $P < 5 \times 10^{-4}$ ). Duplicate samples and those that failed genotyping (sample call rate  $<0.98$ ) were also excluded from further analysis. Association testing was carried out in PLINK<sup>6</sup>.

**US (PA) GWAS dataset:** AAA patients were enrolled through the Department of Vascular Surgery at Geisinger Medical Center, Danville, Pennsylvania, USA as previously reported<sup>2,7</sup>. To identify cases and controls from the electronic medical records, an ePhenotyping algorithm was developed<sup>8</sup>. Briefly, Structured Query Language (SQL) was used to script the algorithm utilizing "Current Procedural Terminology" (CPT) and "International Classification of Diseases" (ICD-9) codes as well as demographic and encounter data to classify individuals as case, control, or excluded. AAA cases were defined as having an AAA repair procedure (case Type 1), or at least one appropriate specialty encounter (vascular clinic) with a ruptured AAA (case Type 2), or at least two specialty encounters with an unruptured AAA (case Type 3). Controls were neither cases nor those excluded, had an encounter within the past 5 years, and had never been assigned an ICD9 code of 441.\*, where \* is a 1 or 2 digit code. Individuals were excluded if 1) they had a thoracic aortic aneurysm or a rare heritable disease with aortic manifestation; 2) they were younger than 40 or older than 89 years, 3) they had a single encounter with a code without mention of rupture (441.4), or 4) they had not had an encounter within the past 5 years. Rare heritable diseases were excluded because the goal of the current study was to identify non-syndromic AAA. Controls under 40 years might yet manifest an AAA, while cases under 40 years of age and without rare syndromic forms of aortic aneurysms are likely due to trauma. The AAA algorithm can be downloaded from [www.PheKb.org](http://www.PheKb.org). The algorithm was validated on a subset of individuals by manual chart review, and implemented at eMERGE network sites. The algorithm was implemented as a workflow in the Konstanz Information Miner (KNIME) (<http://www.knime.org/>).

AAA cases had infrarenal aortic diameter  $\geq 30$  mm as revealed by abdominal imaging. Approximately 20% of individuals with AAA had a family history of AAA. A control group was obtained through the Geisinger MyCode® Project, a cohort of Geisinger Clinic patients recruited for genomic studies. The MyCode® controls were matched for age distribution and sex to the Geisinger Vascular Clinic AAA cases. Based on electronic medical records, controls had no ICD-9 codes for AAA in their records, but they were not screened by ultrasonography for AAA. Both cases and controls from the Geisinger Clinic were of European descent.

The Geisinger cohort used for this study was a subset of a larger cohort comprising 3,264 samples from 3,149 individuals with three phenotypes: 922 putative AAA cases, 981 obesity cases and 1,246 controls. Samples were genotyped on the Illumina HumanOmniExpress-12v1.0 genotyping platform at the University of Pittsburgh Genomics and Proteomics Core Laboratories. Genotypes were called using the Illumina GenomeStudio v2010.3 software. QC consisted of a number of steps: identification of cross-contamination and removal of specimens, call rate of samples ( $> 0.98$  SNPs called), sex consistency between annotated sex and genotyped sex, SNP discordance between replicate sample pairs, SNP call rate ( $> 0.95$  calls in all specimens), SNP minor allele frequency ( $> 0.01$ ), SNP Hardy-Weinberg equilibrium ( $P > 1 \times 10^{-4}$ ), and selection of replicates to retain based on sex-specific Mahalanobis distance ( $< 4.1$ ) and Illumina P10.GC ( $> 0.71$ ). Cross-contamination of samples was detected by excess heterozygosity and excess relatedness (related to more than half of other samples at  $\text{Pi-hat} > 0.0625$ ); four samples were removed prior to other QC steps. After the QC steps above, related individuals (pairwise  $\text{Pi-hat} > 0.15$ ) were removed, retaining the individual and specimen with the highest call rate. A second round of QC was applied using the above SNP and sample criteria to ensure consistency after removal of SNPs and individuals. In addition, the SNP criteria were analyzed per chromosome to ensure that there were no systematic differences (no differences detected). Lastly, principle component analysis (PCA) was used to determine if there were any batch effects during genotyping (no evidence for batch effects). Of the 3,264 samples, 153 were removed for one or more of the QC reasons above. Of the 731,306 SNPs, 95,369 were removed; 2,012 were discordant, 13,107 had a low call rate, 78,086 had a MAF  $< 0.01$ , and 14,056 had a HWE  $P < 1 \times 10^{-4}$  (9,047 SNPs were removed for more than one reason).

The final meta-analysis cohort comprised only those individuals who were identified as definitive AAA cases or controls using the rigorous ePhenotyping algorithm described above.

Imputation was performed as previously described<sup>9</sup>. Briefly: SNPs were re-mapped to the Genome Reference Consortium Human build 37 (GRCh37) and the program liftOver run to ensure mapping consistency. Subsequently all SNPs were mapped from the Illumina TOP notation to the plus (+) strand. Strand was checked using SHAPEIT2 (version r2.644)<sup>10</sup>. Next the data were phased using SHAPEIT2. Imputation was performed using IMPUTE2 (version 2.3.0)<sup>11</sup>. Chromosomes were divided into 6 MB segments with 250 kbp overlap between segments. A total of 5,719,283 SNPs with an info score of  $\geq 0.9$  were used for analysis.

Association analysis without adjustment was performed using PLINK (v1.09)<sup>6</sup> and the imputed SNPs.

The eMERGE Network Imputed GWAS for 41 Phenotypes (the dbGaP eMERGE Phase 1 and 2 Merged data Submission) accession number is: phs000888.v1.p1 which includes the Geisinger AAA data.

**Iceland, deCODE Genetics AAA GWAS dataset:** Icelandic individuals with AAA (defined as infra-renal aortic diameter  $\geq 30$  mm) were recruited from a registry of individuals who were admitted at Landspítali University Hospital, in Reykjavik, Iceland, 1980 – 2006. AAA patients were either followed up or treated by intervention for emergency repair of symptomatic or ruptured AAA or for an elective repair by surgery or endovascular intervention. In total, whole genome data from 557 subjects with AAA, enrolled as part of the cardiovascular disease (CVD) genetics program at deCODE,

were included in the metaGWAS. The Icelandic controls used (n=89,235) were selected from individuals who have participated in various GWA studies and who were recruited as part of genetic programs at deCODE. Individuals with known CVD were excluded as controls<sup>2</sup> but controls were unscreened for AAA.

The Icelandic case and control samples were assayed with the Illumina HumanHap300, HumanHapCNV370 or HumanHap610 bead chips (Illumina, SanDiego, CA, USA). Only SNPs present on all chips were included in the analysis and SNPs were excluded if they had (a) call rates < 95% in cases or controls, (b) MAF<0.01 in the controls, or (c) showed significant deviation from HWE in the controls ( $P < 1 \times 10^{-4}$ ). These criteria were applied separately to genotype data from each of the chip types used and SNPs that showed significant deviation ( $P < 0.0001$  in an ANOVA test) in frequency between the chips were excluded from the analysis. Any samples with a call rate < 0.98 were excluded from the analysis. The final analysis included 293,677 SNPs present on all three chips.

For case-control association analysis, we used a standard likelihood ratio statistic, implemented in the NEMO software<sup>12</sup>, to calculate two-sided P values and ORs for each individual allele, assuming a multiplicative model for risk<sup>13</sup>.

Familial imputation: For the Icelandic data set, we extended the classical case-control association analysis to include *in silico* genotypes of affected individuals who were not genotyped but who had genotyped relatives<sup>14</sup> among the 40,000 Icelanders (about 13% of all living Icelanders) genotyped with the Illumina SNP chips at deCODE Genetics. For every ungenotyped affected individual, we calculated the probability distribution of the genotypes of his or her relatives, given his or her four possible phased genotypes. In practice, we included only genotypes of the affected individual's parents, children, siblings, half-siblings (and the half-sibling's parents), grandparents, grandchildren (and the grandchildren's parents) and spouses. The contribution of the ungenotyped affected individuals through this familial imputation to the effective sample size of the affected individuals,  $na_{eff}$ , was estimated using the Fisher information.

Genomic control: Some of the individuals in the Icelandic case-control groups are related to each other, causing the  $\chi^2$  test statistic to have a mean >1 and median >0.455. We estimated the genome-wide inflation factor  $\lambda_g$  as the average of the 293,677  $\chi^2$  statistics to adjust for both relatedness and potential population stratification<sup>14</sup>.

**The Netherlands AAA GWAS dataset:** The AAA sample set from Utrecht was recruited in 2007-2009 from 8 centres in The Netherlands<sup>2</sup>, mainly when individuals visited their vascular surgeon in the clinic or, in rare cases, during hospital admission for elective or emergency AAA surgery. An AAA was defined as an infrarenal aorta  $\geq 30$  mm. The sample set comprised 89.9% males, with a mean AAA diameter of 58.4 mm, 61.7% had been operated on, of which 8.1 % were after rupture. The Dutch controls used in the AAA GWAS were recruited as part of the Nijmegen Biomedical Study and the Nijmegen Bladder Cancer Study (see <http://dceg.cancer.gov/icbc/membership.html>).

Genotyping was performed on Illumina HumanHap610 chips.<sup>2</sup> As controls, we included 2,791 Dutch subjects who were recruited as part of the Nijmegen Biomedical Study (n=1,832) and the Nijmegen Bladder Cancer Study (n=1,278)<sup>15, 16</sup> These controls were genotyped on Illumina CNV370 Duo BeadChips.

QC: We performed QC using PLINK version 1.07<sup>6</sup>. After removal of SNPs with A/T or C/G alleles and SNPs that were not called in any individual, we performed sample QC and SNP QC.

Sample QC was performed after merging cases and controls, using a subset of common, high-quality SNPs (as defined by SNPs without deviation from HWE ( $P > 0.001$ ), with high MA) (>0.2) and with low rate of missing genotypes (<0.01)). Linkage disequilibrium (LD) pruning ( $r^2 > 0.5$ ) was performed. Subjects were removed based on the following three criteria: missing genotypes (subjects with call

rates < 0.95 were removed), heterozygosity (subjects were excluded if the inbreeding coefficient deviated more than 3 standard deviations from the mean) and cryptic relatedness (by calculating identity-by-descent (IBD) for each pair of individuals). In each pair with an IBD proportion of >20%, a subject was excluded, if it exhibited distant relatedness with more than one individual. For case-control pairs, we removed the control subject. In the case-case or control-control pairs, the subject with the lowest call rate was excluded.

Using these common, high-quality SNPs, we performed PCA using EIGENSTRAT on the remaining study subjects and HapMap-CEU subjects. We excluded SNPs from three regions with known long-distance LD: the major histocompatibility (MHC) region (chr6: 25.8-36 Mbp), the chromosome 8 inversion (chr8: 6-16 Mbp) and a chromosome 17 region (chr17: 40-45 Mbp). We created PC plots with the first four PCs, using R version 2.11.<sup>17</sup> Based on visual inspection of these plots, we excluded subjects that appeared to be outliers with respect to the CEU or the study population. After outlier removal, we recomputed PCs for them to be included as covariates in the logistic regression models.

After sample QC, we excluded SNPs with more than 2% missing genotypes, MAF < 0.01, missing genotype rate higher than MAF, and HWE deviation ( $P < 0.001$ ). Because cases and controls had been genotyped separately, we performed these QC steps in each study cohort separately and again after merging cases and controls. We also removed SNPs with a differential degree of missing genotypes between cases and controls ( $P < 1 \times 10^{-5}$ ; chi-squared test).

Imputation: We performed genotype imputation using the pre-phasing/imputation stepwise approach implemented in IMPUTE2 and SHAPEIT (chunk size of 3 Mb and default parameters)<sup>10, 18</sup>. The imputation reference set consisted of 2,184 phased haplotypes from the full 1000 Genomes Project data set (February 2012; 40,318,253 variants). All genomic locations are given in NCBI Build 37/UCSC hg19 coordinates. After imputation, SNPs with an imputation accuracy score < 0.6 or MAF < 0.005 were excluded.

Association testing: Association testing was carried out in PLINK<sup>6</sup> using imputed SNP dosages. We included as covariates the first four PCs. We calculated genomic inflation factors ( $\lambda_{GC}$ ), defined as the ratio of the median of the empirically observed distribution of the test statistic to the expected median<sup>19</sup>.

## **b) Validation Cohorts**

**Aneurysm Consortium (AC) validation cohort:** The same inclusion/exclusion criteria and recruitment sites were used as for the Aneurysm Consortium AAA GWAS. The lead SNPs (or their high LD proxies), identified in the discovery analysis, were genotyped at The Wellcome Trust Sanger Institute, Cambridge, UK using Sequenom iPLEX platform. Allele frequency summary results (odds ratio and 95% confidence interval) were generated using Chi-squared tests as implemented in the SHEsis web-based software package<sup>20</sup> (available: <http://analysis.bio-x.cn/SHEsisMain.htm>). Deviation from HWE was estimated and results are shown in **Online Table VI**.

**New Zealand (NZ) Validation cohort:** NZ validation cohort participants were recruited from the same sites as those in the GWAS. Case and control inclusion/exclusion criteria were identical to that of the NZ AAA GWAS, with all controls having been screened by ultrasound.

The lead SNPs (or their high LD proxies), identified in the discovery analysis, were genotyped at the Vascular Research Group, University of Otago using the TaqMan (LifeTechnologies) platform. Allele frequency summary results (odds ratio and 95% confidence interval) were generated using Chi-squared tests as implemented in the SHEsis web-based software package<sup>20</sup>. Deviation from HWE was estimated and results are shown in **Online Table VI**.

**Belgium and Canada validation cohorts:** These sample-sets, in which all individuals were of European descent, included individuals with AAA who were admitted either for emergency repair of ruptured AAA or for an elective surgery to the University Hospital of Liege (Liege, Belgium) and to Dalhousie University Hospital (Halifax, Canada). AAA was defined as an infrarenal aortic diameter  $\geq 30$  mm. Details of these case-control sets have been reported previously<sup>21, 22</sup>. Approximately 40% of individuals with AAA had a family history of AAA. Control samples (51% males) were obtained from spouses of individuals with AAA or from individuals admitted to the same hospitals for reasons other than AAA. Controls had no known AAA, but they were not screened by ultrasonography for AAA.

The lead SNPs (or their high LD proxies), identified in the discovery analysis, were genotyped in the Tromp-Kuivaniemi Laboratory at Geisinger Health System using TaqMan (LifeTechnologies) platform. Allele frequency summary results (odds ratio and 95% confidence interval) were generated using Chi-squared tests as implemented in the SHesis web-based software package<sup>20</sup>. Deviation from HWE was estimated and results are shown in **Online Table VI**.

**eMERGE phase II (US) validation cohort:** This cohort consisted of 338 AAA cases and 1,696 controls with GWAS data<sup>9</sup> available from Mayo Clinic, Marshfield Clinic, Mount Sinai School of Medicine, Vanderbilt University, Northwestern University and Group Health Research Institute. The cases and controls were ascertained from the electronic medical records<sup>23</sup> using an ePhenotyping algorithm<sup>8</sup> as described above. The samples had been genotyped in various GWAS and then imputed (see above). Allele frequency summary results (odds ratio and 95% confidence interval) were generated using Chi-squared tests as implemented in the SHesis web-based software package<sup>20</sup>. Deviation from HWE was estimated and results are shown in **Online Table VI**. The eMERGE Network Imputed GWAS for 41 Phenotypes (the dbGaP eMERGE Phase 1 and 2 Merged data Submission) accession number is: phs000888.v1.p1 which includes these data.

**US Validation 2 cohort:** A second US case/control validation cohort was derived from the Mayo Vascular Disease Biorepository<sup>24</sup> (Mayo VDB; <http://www.mayo.edu/research/labs/cardiovascular-biomarkers/vascular-diseases-biorepository>), the Presbyterian University Hospital in Pittsburgh<sup>25</sup>, Vanderbilt University (BioVU<sup>®</sup>)<sup>26</sup>, Marshfield Clinic (Personalized Medicine Research Project<sup>®</sup>)<sup>27</sup>, Mount Sinai School of Medicine (BioMe<sup>®</sup>)<sup>28</sup>, and Northwestern University (NUGene<sup>®</sup>)<sup>29</sup>. The cases and controls at Mayo Clinic, Vanderbilt University, Marshfield Clinic, Mount Sinai School of Medicine, and Northwestern University were phenotypically ascertained using the same ePhenotyping algorithm<sup>8</sup> described above, whereas the AAA cases from the Presbyterian University Hospital in Pittsburgh were patients who had undergone elective or emergency surgery for AAA<sup>25</sup>.

The lead SNPs (or their high LD proxies), identified in the discovery analysis, were genotyped in the Tromp-Kuivaniemi Laboratory at Geisinger Health System using TaqMan (LifeTechnologies) platform. Allele frequency summary results (odds ratio and 95% confidence interval) were generated using Chi-squared tests as implemented in the SHesis web-based software package<sup>20</sup>. Deviation from HWE was estimated and results are shown in **Online Table VI**.

**Italy validation cohort:** This group consisted of 761 AAA cases and 520 controls. AAA cases were individuals referred to the Vascular Surgery Unit of the University of Florence. Familial and inflammatory AAAs were excluded from the study. All control subjects (n=520) had a negative personal and family history of AAA and were of comparable age and sex distribution to that of the AAA patients. A more detailed description of the study populations has been previously published<sup>30</sup>.

The lead SNPs (or their high LD proxies), identified in the discovery analysis, were genotyped in the Giusti Laboratory at University of Florence using TaqMan (LifeTechnologies) platform. Allele frequency summary results (odds ratio and 95% confidence interval) were generated using Chi-squared tests as implemented in the SHEsis web-based software package<sup>20</sup>. Deviation from HWE was estimated and results are shown in **Online Table VI**.

**Poland validation cohort:** This group consisted of 481 AAA cases scheduled for surgery at the Department of General and Vascular Surgery of the Poznan University of Medical Sciences in the years 1999–2011. The control group, consisting of 487 subjects matched for age ( $\pm 5$  years) and sex to the AAA patients, was selected during the same time from the Poznan district<sup>31</sup>. The collection of samples was approved by the Bioethics Committee of the Poznan University of Medical Sciences. The diagnosis of AAA was evaluated by computed tomography angiography or magnetic resonance angiography. Based on physical examination supplemented with ultrasound duplex color scanning, the coexistence of PAD was recognized in 60.3% of the AAA patients. All patients were treated pharmacologically with statins, antiplatelet drugs and other drugs (antihypertensive or antidiabetic), depending on their clinical condition. The exclusion criteria for the controls included known aneurysms and PAD.

The lead SNPs (or their high LD proxies), identified in the discovery analysis, were genotyped in the Tromp-Kuivaniemi Laboratory at Geisinger Health System using TaqMan (LifeTechnologies) platform. Allele frequency summary results (odds ratio and 95% confidence interval) were generated using Chi-squared tests as implemented in the SHEsis web-based software package<sup>20</sup>. Deviation from HWE was estimated and results are shown in **Online Table VI**.

## META-ANALYSIS of GWAS datasets

The discovery analysis consisted of the six cohorts with GWAS data detailed above, comprising 4,972 AAA cases and 99,858 controls, that were genotyped with a variety of genome-wide SNP arrays (**Online Table I**). All cohorts underwent QC filtering using the manufacturers' array-specific guidelines but with consistently applied inclusion criteria of SNP or sample call rates >95% and HWE  $P > 5 \times 10^{-5}$  in controls<sup>1-3, 7</sup>. Each cohort then underwent imputation (<sup>9</sup>see above). Following imputation SNPs were quality controlled by quality score ( $Q > 0.9$ ) and  $MAF > 0.05$  in controls filtering, resulting in a common set of 5,363,770 SNPs across all discovery phase participants.

To obtain data for combination in the meta-analysis each case-control cohort was first analysed individually. Logistic regression models were used with AAA as a binary outcome in each cohort. Summary data [sample size, P-value, effect size (or log odds ratio), and the effect allele], unadjusted for covariates, for each SNP were combined in the meta-analysis.

The metaGWAS analysis was conducted using the METAL software package<sup>32</sup> on the BCISNPmax database platform (version 3.5, BCI Platforms, Espoo, Finland). METAL was implemented using the sample size scheme with weighting based on the effective sample size [ $N_{\text{eff}} = 4 / (1/N_{\text{cases}} + 1/N_{\text{controls}})$ ]. This approach was preferred over an inverse-variance weighted meta-analysis due to the disproportionate number of controls in some of the contributing cohorts and the fact that effect standard errors were not available in the data provided from Iceland and the United States (Geisinger) (**Online Table I**). The GWAS datasets from Iceland and the Netherlands were adjusted for genomic inflation prior to inclusion in the meta-analysis. The overall meta-GWAS analysis was adjusted for genomic inflation ( $\lambda$ ) in each cohort (**Online Table I; Online Figure I**). An initial ( $\lambda$ -adjusted) discovery threshold of  $P < 5 \times 10^{-6}$  was used to identify SNPs for subsequent validation genotyping.

The lead SNPs (or their high LD proxies), identified in the discovery analysis, were then genotyped in a further 8 independent cohorts (**Online Table II**). Each cohort's allele frequency summary results (odds ratio and 95% confidence interval) were generated using Chi-squared tests as implemented in the SHEsis web-based software package. Combined (discovery+validation) fixed effect meta-analysis was performed using a Maentel–Haenzel method with the genome-wide  $P$ -value significance threshold being set at  $5 \times 10^{-8}$ . The Maentel-Haenzel method was chosen since SNPs from the discovery and validation studies that were being combined demonstrated effects in the same direction and with low/medium heterogeneity. A sensitivity analyses of the combined (discovery+validation) study data were also performed using a random-effects model<sup>33</sup>. The results from the discovery phase are presented in **Table 1; Online Tables III and IV; Figures 1 and 2; and Online Figures I and II**. The validation results are presented in **Table 1 and Online Tables V and VI**. Results from the combined analyses are presented in **Table 1 and Online Table VII**. Results from the sensitivity analysis are shown in **Online Table VIII**.

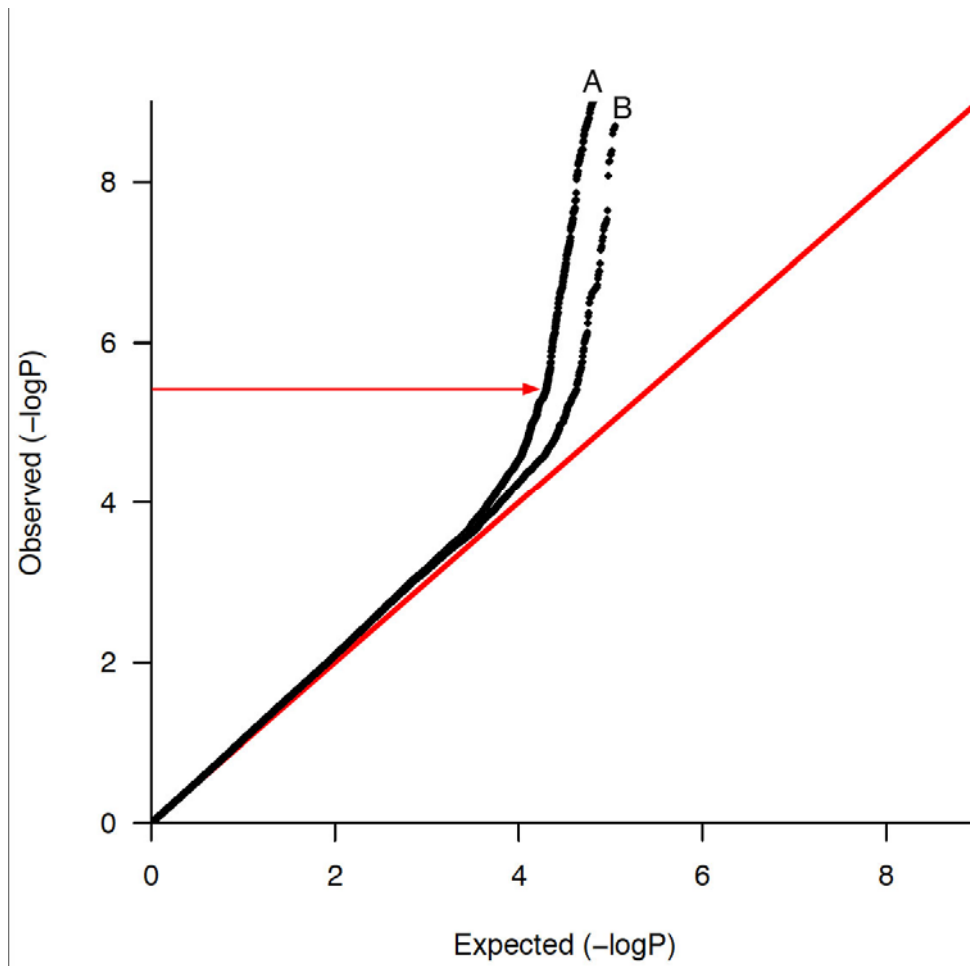

**Online Figure I.** Q-Q plot for the AAA meta-GWAS, showing (A) all 5.3 M SNPs with MAF>0.05 and (B) excluding the six previously identified loci (all SNPs within 100 kb of the peak variant associated with *SORT1*, *IL6R*, *CDKN2BAS1*, *DAB2IP*, *LDLR*, *LRP1*), generated from a comparison of 4,972 cases and 99,858 controls from 6 separate GWAS. The red arrow indicates the ( $\lambda$ -adjusted)  $P < 5 \times 10^{-6}$  discovery threshold (362 SNPs in plot A).

**Online Table I. Genome-wide association study (GWAS) cohort details.** Individual level data were not available to calculate overall median age.

| GWAS cohorts        | Cases        |       |                    | Controls      |        |                    | GWAS Case weight (%) | Total* Case weight (%) | N <sub>effective</sub> | Genotyping platform  | Genomic inflation ( $\lambda$ ) factor | Prior Adjustments |
|---------------------|--------------|-------|--------------------|---------------|--------|--------------------|----------------------|------------------------|------------------------|----------------------|----------------------------------------|-------------------|
|                     | Nn           | %Male | Median Age (years) | N             | % Male | Median Age (years) |                      |                        |                        |                      |                                        |                   |
| NZ 1                | 608          | 78    | 75                 | 612           | 74     | 69                 | 12.2                 | 6.0                    | 1,220                  | Affymetrix SNP6      | 1.07                                   | None              |
| NZ 2                | 397          | 84    | 77                 | 384           | 80     | 67                 | 8.0                  | 3.9                    | 781                    | Illumina Omni2.5     | 1.05                                   | None              |
| Aneurysm Consortium | 1,846        | 98    | 72                 | 5,605         | 49     | 52                 | 37.1                 | 18.1                   | 5,555                  | Illumina 670         | 1.15                                   | None              |
| Netherlands         | 840          | 90    | 68                 | 2,791         | 60     | 51                 | 16.9                 | 8.2                    | 2,583                  | Illumina 300/370/610 | 1.11                                   | Lambda            |
| US (PA)             | 724          | 99    | 77                 | 1,231         | 68     | 68                 | 14.6                 | 7.1                    | 1,824                  | Illumina OmniExpress | 1.06                                   | None              |
| Iceland deCODE      | 557          | 77    | 72                 | 89,235        | 44     | 60                 | 11.2                 | 5.5                    | 2,214                  | Illumina 300/370/610 | 0.70                                   | Lambda            |
| <b>Total</b>        | <b>4,972</b> |       | <b>N/A</b>         | <b>99,858</b> |        | <b>N/A</b>         |                      | <b>48.7%</b>           | <b>14,176</b>          |                      |                                        |                   |

**Online Table II. Independent validation cohort details**

| Validation cohorts                  | Cases        |        |                    | Controls     |        |                    | Validation Case weight (%) | Total* Case weight (%) | N <sub>effective</sub> | Genotyping platform                      |
|-------------------------------------|--------------|--------|--------------------|--------------|--------|--------------------|----------------------------|------------------------|------------------------|------------------------------------------|
|                                     | N            | % Male | Median Age (years) | N            | % Male | Median Age (years) |                            |                        |                        |                                          |
| Aneurysm Consortium validation (AC) | 1,236        | 84     | 72                 | 2,196        | 93     | 68                 | 23.6                       | 12.1                   | 3,163                  | Sequenom                                 |
| NZ validation                       | 753          | 81     | 77                 | 1,237        | 67     | 68                 | 14.4                       | 7.4                    | 1,872                  | Taqman                                   |
| Italy validation                    | 761          | 79     | 73                 | 520          | 78     | 72                 | 14.5                       | 7.5                    | 1,236                  | Taqman                                   |
| Poland validation                   | 481          | 86     | 69                 | 487          | 72     | 59                 | 9.2                        | 4.7                    | 968                    | Taqman                                   |
| eMERGE US validation 1              | 338          | 80     | 82                 | 1696         | 80     | 82                 | 6.5                        | 3.3                    | 1127                   | Imputed data from various GWAS platforms |
| US validation 2                     | 1,176        | 82     | 73                 | 1,371        | 64     | 68                 | 22.5                       | 11.5                   | 2,532                  |                                          |
| Belgium validation                  | 339          | 91     | N/A                | 265          | 68     | N/A                | 6.5                        | 3.3                    | 595                    | Taqman                                   |
| Canada validation                   | 148          | 75     | N/A                | 136          | 79     | N/A                | 2.8                        | 1.5                    | 283                    | Taqman                                   |
| <b>Total</b>                        | <b>5,232</b> |        | <b>N/A</b>         | <b>7,908</b> |        | <b>N/A</b>         |                            | <b>51.3%</b>           |                        |                                          |

\*Combined (GWAS + Validation) analysis consisted of 10,204 AAA cases and 107,766 controls.

**Online Table III:** Summary of results for the lead SNPs at 19 putative AAA associated loci ( $P < 5 \times 10^{-6}$ ) in the meta-analysis of 6 primary AAA GWAS datasets with a total of 4,972 AAA cases and 99,858 controls (see **Online Table I** for details on these cohorts). The results were based on an  $N_{\text{effective}}$  weighted METAL analysis. The order of cohorts in the direction column is the same as that in **Online Table I** [NZ 1, NZ 2, Aneurysm Consortium, Netherlands, US (PA), Iceland (deCODE)]. See **Online Table IV** for MAF values for cases and controls separately.

| $N_{\text{effective}}$ weighted analysis |                            |           |                                     |             |              |           |                        |       |       |
|------------------------------------------|----------------------------|-----------|-------------------------------------|-------------|--------------|-----------|------------------------|-------|-------|
| Chr                                      | SNP                        | Position  | Gene                                | Risk allele | Other allele | Direction | P                      | Phet  | $I^2$ |
| 1                                        | rs602633                   | 109821511 | Near <i>PSRC1 CELSR2 SORT1</i>      | T           | G            | -----     | $1.72 \times 10^{-07}$ | 0.097 | 46.3  |
| 1                                        | rs12133641                 | 154428283 | <i>IL6R</i>                         | A           | G            | ++++++    | $1.67 \times 10^{-10}$ | 0.903 | 0.0   |
| 1                                        | <i>rs4129267 proxySNP</i>  | 154426264 | <i>IL6R</i>                         | T           | C            | -----     | $9.26 \times 10^{-10}$ | 0.886 | 0.0   |
| 1                                        | rs1795061                  | 214409280 | near <i>SMYD2</i>                   | T           | C            | ++++++    | $1.80 \times 10^{-07}$ | 0.069 | 51.2  |
| 2                                        | rs13382862                 | 20882449  | near <i>C2orf43</i> and <i>GDF7</i> | A           | G            | -----     | $3.03 \times 10^{-08}$ | 0.878 | 0.0   |
| 4                                        | rs10029392                 | 5616048   | <i>EVC2</i>                         | T           | G            | ++++++    | $4.60 \times 10^{-06}$ | 0.147 | 38.8  |
| 5                                        | rs12659791                 | 74757758  | <i>COL4A3BP</i>                     | T           | C            | -----+    | $2.28 \times 10^{-06}$ | 0.105 | 45.1  |
| 6                                        | rs3176334                  | 36648364  | <i>CDKN1A</i>                       | C           | T            | -----     | $1.45 \times 10^{-06}$ | 0.627 | 0.0   |
| 6                                        | <i>rs733590 proxySNP</i>   | 36645203  | <i>CDKN1A</i>                       | T           | C            | -----     | $8.74 \times 10^{-06}$ | 0.584 | 0.0   |
| 8                                        | rs3110425                  | 107649626 | <i>OXR1</i>                         | T           | C            | -----     | $3.25 \times 10^{-06}$ | 0.895 | 0.0   |
| 9                                        | rs10757274                 | 22096055  | <i>CDKN2BAS1/ANRIL</i>              | A           | G            | -----     | $2.32 \times 10^{-13}$ | 0.520 | 0.0   |
| 9                                        | rs10985349                 | 124425243 | <i>DAB2IP</i>                       | T           | C            | ++++++    | $8.98 \times 10^{-07}$ | 0.181 | 34.0  |
| 12                                       | rs1385526                  | 57532749  | <i>LRP1</i>                         | C           | G            | -----     | $1.31 \times 10^{-09}$ | 0.597 | 0.0   |
| 13                                       | rs9316871                  | 22861921  | <i>LINC00540</i>                    | A           | G            | ++++++    | $5.95 \times 10^{-06}$ | 0.143 | 39.4  |
| 15                                       | rs17189674                 | 89040591  | <i>DET1</i>                         | A           | G            | ++++++    | $1.05 \times 10^{-06}$ | 0.663 | 0.0   |
| 19                                       | rs6511720                  | 11202306  | <i>LDLR</i>                         | T           | G            | -----     | $5.71 \times 10^{-12}$ | 0.679 | 0.0   |
| 19                                       | rs12980543                 | 56096197  | <i>ZNF579</i>                       | A           | G            | ++++++    | $2.30 \times 10^{-06}$ | 0.301 | 17.4  |
| 19                                       | <i>rs11084402 proxySNP</i> | 56093365  | <i>ZNF579</i>                       | T           | C            | ++++++    | $4.33 \times 10^{-06}$ | 0.218 | 29.0  |
| 20                                       | rs6516091                  | 6050622   | near <i>FERMT1</i>                  | A           | G            | +++++-    | $3.82 \times 10^{-09}$ | 0.027 | 60.5  |
| 20                                       | rs58749629                 | 44571317  | near <i>PCIF1 ZNF335 MMP9</i>       | A           | G            | ++++++    | $7.97 \times 10^{-10}$ | 0.473 | 0.0   |
| 20                                       | <i>rs3827066 proxySNP</i>  | 44586023  | near <i>PCIF1 ZNF335 MMP9</i>       | T           | C            | ++++++    | $9.18 \times 10^{-10}$ | 0.729 | 0.0   |
| 21                                       | rs2836411                  | 39819830  | <i>ERG</i>                          | T           | C            | +++++-    | $1.53 \times 10^{-07}$ | 0.103 | 45.5  |
| X                                        | rs5954362                  | 140673423 | <i>SPANXA1</i>                      | G           | C            | ---       | $2.73 \times 10^{-07}$ | 0.271 | 23.2  |

**Online Table IV:** Individual cohort data from the 6 primary AAA GWAS studies, combined using the Maentel–Haenzel fixed effect method, for the lead SNPs at the 19 putative AAA loci identified in the meta-analysis of GWAS. See **Online Table I** for details on these cohorts. This table spans this and the following 6 pages.

| CHR                 | SNP       | POSITION              | Region                         | Cohort                   | OR (95% CI)           | P                     | Case/ Control | MAF <sub>AAA</sub> | MAF <sub>Control</sub> |         |        |
|---------------------|-----------|-----------------------|--------------------------------|--------------------------|-----------------------|-----------------------|---------------|--------------------|------------------------|---------|--------|
| 1                   | rs602633  | 109821511             | Near <i>PSRC1 CELSR2 SORT1</i> | NZ GWAS 1                | 0.653 (0.535 - 0.797) | 2.59E-05              | 608/ 612      | 0.1743             | 0.2442                 |         |        |
|                     |           |                       |                                | NZ GWAS 2                | 0.874 (0.680 - 1.125) | 0.2952                | 397/ 384      | 0.1870             | 0.2083                 |         |        |
|                     |           |                       |                                | Aneurysm Consortium GWAS | 0.864 (0.785 - 0.950) | 0.002639              | 1846/ 5605    | 0.1942             | 0.2181                 |         |        |
|                     |           |                       |                                | Netherlands GWAS         | 0.899 (0.778 - 1.038) | 0.1458                | 840/ 2791     | 0.2151             | 0.2336                 |         |        |
|                     |           |                       |                                | US (PA) GWAS             | 0.793 (0.680 - 0.925) | 0.003166              | 724/ 1231     | 0.1843             | 0.2217                 |         |        |
|                     |           |                       |                                | Iceland deCODE GWAS      | 0.916 (0.783 - 1.073) | 0.2768                | 557/ 89235    | 0.1944             | 0.2085                 |         |        |
|                     |           |                       |                                |                          |                       |                       |               | OR (95% CI)        | Z-score                | P-value | df (Q) |
|                     | Combined  |                       |                                |                          | 0.845 (0.796 - 0.897) | -5.534                | 3.1E-08       | 5                  | 29.4                   | 0.215   |        |
|                     | 1         | rs12133641            | 154428283                      | <i>IL6R</i>              | NZ GWAS 1             | 0.841 (0.715 - 0.989) | 0.03596       | 608/ 612           | 0.3881                 | 0.43    |        |
|                     |           |                       |                                |                          | NZ GWAS 2             | 0.838 (0.683 - 1.027) | 0.08904       | 397/ 384           | 0.3687                 | 0.4108  |        |
| rs4129267 proxy     |           | 154426264             | Aneurysm Consortium GWAS       |                          | 0.878 (0.813 - 0.948) | 8.50E-04              | 1846/ 5605    | 0.3762             | 0.4072                 |         |        |
|                     |           |                       | Netherlands GWAS               |                          | 0.818 (0.723 - 0.924) | 0.001291              | 840/ 2791     | 0.3475             | 0.3936                 |         |        |
| US (PA) GWAS        |           | 0.817 (0.720 - 0.927) | 0.001744                       |                          | 724/ 1231             | 0.3455                | 0.3925        |                    |                        |         |        |
| Iceland deCODE GWAS |           | 0.879 (0.775 - 0.997) | 0.04487                        |                          | 557/ 89235            | 0.3857                | 0.4169        |                    |                        |         |        |
|                     |           |                       |                                |                          | OR (95% CI)           | Z-score               | P-value       | df (Q)             | HetI <sup>2</sup>      | HetPval |        |
| Combined            |           |                       |                                |                          | 0.854 (0.813 - 0.896) | -6.382                | 1.7E-10       | 5                  | 0                      | 0.945   |        |
| 1                   | rs1795061 | 214409280             | near <i>SMYD2</i>              | NZ GWAS 1                | 1.033 (0.868 - 1.229) | 0.716                 | 608/ 612      | 0.3224             | 0.3153                 |         |        |
|                     |           |                       |                                | NZ GWAS 2                | 1.364 (1.087 - 1.713) | 0.007383              | 397/ 384      | 0.3456             | 0.2791                 |         |        |
|                     |           |                       |                                | Aneurysm Consortium GWAS | 1.135 (1.048 - 1.229) | 0.001908              | 1846/ 5605    | 0.3342             | 0.3067                 |         |        |
|                     |           |                       |                                | Netherlands GWAS         | 1.075 (0.943 - 1.225) | 0.2806                | 840/ 2791     | 0.2952             | 0.2784                 |         |        |
|                     |           |                       |                                | US (PA) GWAS             | 1.324 (1.163 - 1.507) | 2.16E-05              | 724/ 1231     | 0.3517             | 0.2907                 |         |        |
|                     |           |                       |                                | Iceland deCODE GWAS      | 1.133 (0.997 - 1.287) | 0.0559                | 557/ 89235    | 0.4247             | 0.3954                 |         |        |
|                     |           |                       |                                |                          |                       |                       |               | OR (95% CI)        | Z-score                | P-value | df (Q) |
|                     | Combined  |                       |                                |                          | 1.154(1.097 - 1.214)  | 5.527                 | 3.3E-07       | 5                  | 47.9                   | 0.087   |        |

| CHR      | SNP        | POSITION               | Region           | Cohort                   | OR (95% CI)           | P        | Case/ Control | MAF <sub>AAA</sub> | MAF <sub>Control</sub> |
|----------|------------|------------------------|------------------|--------------------------|-----------------------|----------|---------------|--------------------|------------------------|
| 2        | rs13382862 | 20882449               | C2orf43 and GDF7 | NZ GWAS 1                | 0.886 (0.742 - 1.057) | 0.1787   | 608/ 612      | 0.3424             | 0.3701                 |
|          |            |                        |                  | NZ GWAS 2                | 0.766 (0.618 - 0.948) | 0.01432  | 397/ 384      | 0.3307             | 0.3922                 |
|          |            |                        |                  | Aneurysm Consortium GWAS | 0.865 (0.799 - 0.937) | 3.78E-04 | 1846/ 5605    | 0.3359             | 0.3689                 |
|          |            |                        |                  | Netherlands GWAS         | 0.862 (0.763 - 0.974) | 0.0176   | 840/ 2791     | 0.3430             | 0.3761                 |
|          |            |                        |                  | US (PA) GWAS             | 0.855 (0.750 - 0.974) | 0.01851  | 724/ 1231     | 0.3255             | 0.3609                 |
|          |            |                        |                  | Iceland deCODE GWAS      | 0.892 (0.782 - 1.016) | 0.08629  | 557/ 89235    | 0.3420             | 0.3683                 |
|          |            |                        |                  | OR (95% CI)              |                       | Z-score  | P-value       | df (Q)             | HetI <sup>2</sup>      |
| Combined |            | 0.863 (0.820 - 0.907)  | -5.75            | 8.8E-09                  | 5                     | 0        | 0.942         |                    |                        |
| 4        | rs10029392 | 5616048                | EVC2             | NZ GWAS 1                | 2.071 (1.444 - 2.968) | 5.47E-05 | 608/ 612      | 0.0801             | 0.0404                 |
|          |            |                        |                  | NZ GWAS 2                | 1.199 (0.733 - 1.961) | 0.4692   | 397/ 384      | 0.0467             | 0.0393                 |
|          |            |                        |                  | Aneurysm Consortium GWAS | 1.306 (1.081 - 1.578) | 0.005588 | 1846/ 5605    | 0.0436             | 0.0338                 |
|          |            |                        |                  | Netherlands GWAS         | 1.180 (0.869 - 1.601) | 0.2894   | 840/ 2791     | 0.0396             | 0.0358                 |
|          |            |                        |                  | US (PA) GWAS             | 1.166 (0.882 - 1.542) | 0.28     | 724/ 1231     | 0.0517             | 0.0447                 |
|          |            |                        |                  | Iceland deCODE GWAS      | 1.402 (1.033 - 1.904) | 0.03019  | 557/ 89235    | 0.0587             | 0.0445                 |
|          |            |                        |                  | OR (95% CI)              |                       | Z-score  | P-value       | df (Q)             | HetI <sup>2</sup>      |
| Combined |            | 1.331 (1.1851 - 1.495) | 4.825            | 1.4E-06                  | 5                     | 32.1     | 0.195         |                    |                        |
| 5        | rs12659791 | 74757758               | COL4A3BP         | NZ GWAS 1                | 1.284 (0.837 - 1.970) | 0.2512   | 608/ 612      | 0.1763             | 0.1429                 |
|          |            |                        |                  | NZ GWAS 2                | 1.067 (0.808 - 1.409) | 0.6466   | 397/ 384      | 0.1549             | 0.1466                 |
|          |            |                        |                  | Aneurysm Consortium GWAS | 1.304 (1.181 - 1.440) | 1.59E-07 | 1846/ 5605    | 0.1785             | 0.1428                 |
|          |            |                        |                  | Netherlands GWAS         | 1.216 (1.040 - 1.421) | 0.01392  | 840/ 2791     | 0.1710             | 0.1480                 |
|          |            |                        |                  | US (PA) GWAS             | 1.077 (0.909 - 1.278) | 0.3911   | 724/ 1231     | 0.1510             | 0.1417                 |
|          |            |                        |                  | Iceland deCODE GWAS      | 0.986 (0.819 - 1.188) | 0.8844   | 557/ 89235    | 0.1264             | 0.1279                 |
|          |            |                        |                  | OR (95% CI)              |                       | Z-score  | P-value       | df (Q)             | HetI <sup>2</sup>      |
| Combined |            | 1.192 (1.115 - 1.274)  | 5.151            | 2.6E-07                  | 5                     | 45.5     | 0.102         |                    |                        |

| CHR | SNP            | POSITION  | Region            | Cohort                   | OR (95% CI)           | P        | Case/ Control | MAF <sub>AAA</sub> | MAF <sub>Control</sub> |
|-----|----------------|-----------|-------------------|--------------------------|-----------------------|----------|---------------|--------------------|------------------------|
| 6   | rs733590 proxy | 36648364  | CDKN1A            | NZ GWAS 1                | 1.027 (0.870 - 1.213) | 0.7498   | 608/ 612      | 0.3550             | 0.3489                 |
|     |                |           |                   | NZ GWAS 2                | 1.108 (0.896 - 1.371) | 0.3434   | 397/ 384      | 0.3405             | 0.3178                 |
|     |                |           |                   | Aneurysm Consortium GWAS | 1.128 (1.040 - 1.224) | 0.003699 | 1846/ 5605    | 0.3612             | 0.3339                 |
|     |                |           |                   | Netherlands GWAS         | 1.228 (1.085 - 1.391) | 0.001181 | 840/ 2791     | 0.4027             | 0.3552                 |
|     |                |           |                   | US (PA) GWAS             | 1.160 (1.024 - 1.315) | 0.01962  | 724/ 1231     | 0.4052             | 0.3699                 |
|     |                |           |                   | Iceland deCODE GWAS      | 1.056 (0.925 - 1.206) | 0.42     | 557/ 89235    | 0.3449             | 0.3329                 |
|     |                |           |                   |                          | OR (95% CI)           | Z-score  | P-value       | df (Q)             | HetI <sup>2</sup>      |
|     |                |           |                   | Combined                 | 1.127 (1.072 - 1.186) | 4.665    | 3.1E-06       | 5                  | 0                      |
| 8   | rs3110425      | 107649626 | OXR1              | NZ GWAS 1                | 0.909 (0.769 - 1.075) | 0.2639   | 608/ 612      | 0.3460             | 0.3679                 |
|     |                |           |                   | NZ GWAS 2                | 0.852 (0.692 - 1.048) | 0.1284   | 397/ 384      | 0.3469             | 0.3842                 |
|     |                |           |                   | Aneurysm Consortium GWAS | 0.883 (0.816 - 0.955) | 0.001861 | 1846/ 5605    | 0.3310             | 0.3613                 |
|     |                |           |                   | Netherlands GWAS         | 0.865 (0.764 - 0.980) | 0.02225  | 840/ 2791     | 0.3340             | 0.3680                 |
|     |                |           |                   | US (PA) GWAS             | 0.954 (0.840 - 1.085) | 4.68E-01 | 724/ 1231     | 0.3650             | 0.3760                 |
|     |                |           |                   | Iceland deCODE GWAS      | 0.849 (0.752 - 0.959) | 0.012    | 557/ 89235    | 0.3480             | 0.3870                 |
|     |                |           |                   |                          | OR (95% CI)           | Z-score  | P-value       | df (Q)             | HetI <sup>2</sup>      |
|     |                |           |                   | Combined                 | 0.885 (0.843 - 0.93)  | -4.873   | 1.1E-06       | 5                  | 0                      |
| 9   | rs10757274     | 22096055  | ANRIL/ CDKN2B-AS1 | NZ GWAS 1                | 0.814 (0.694 - 0.955) | 0.01152  | 608/ 612      | 0.4553             | 0.5066                 |
|     |                |           |                   | NZ GWAS 2                | 0.922 (0.755 - 1.125) | 0.4232   | 397/ 384      | 0.4484             | 0.4686                 |
|     |                |           |                   | Aneurysm Consortium GWAS | 0.842 (0.781 - 0.908) | 7.91E-06 | 1846/ 5605    | 0.4707             | 0.5137                 |
|     |                |           |                   | Netherlands GWAS         | 0.742 (0.660 - 0.834) | 6.31E-07 | 840/ 2791     | 0.4746             | 0.5465                 |
|     |                |           |                   | US (PA) GWAS             | 0.883 (0.782 - 0.997) | 0.04425  | 724/ 1231     | 0.4793             | 0.5104                 |
|     |                |           |                   | Iceland deCODE GWAS      | 0.838 (0.739 - 0.949) | 0.005418 | 557/ 89235    | 0.5111             | 0.555                  |
|     |                |           |                   |                          | OR (95% CI)           | Z-score  | P-value       | df (Q)             | HetI <sup>2</sup>      |
|     |                |           |                   | Combined                 | 0.832 (0.793 - 0.872) | -7.612   | 2.7E-14       | 5                  | 9.9                    |

| CHR | SNP        | POSITION              | Region    | Cohort                   | OR (95% CI)           | P        | Case/ Control | MAF <sub>AAA</sub> | MAF <sub>Control</sub> |
|-----|------------|-----------------------|-----------|--------------------------|-----------------------|----------|---------------|--------------------|------------------------|
| 9   | rs10985349 | 124425243             | DAB2IP    | NZ GWAS 1                | 1.326 (1.078 - 1.630) | 0.007382 | 608/ 612      | 0.2053             | 0.1631                 |
|     |            |                       |           | NZ GWAS 2                | 1.443 (1.112 - 1.872) | 0.005649 | 397/ 384      | 0.2091             | 0.1549                 |
|     |            |                       |           | Aneurysm Consortium GWAS | 1.159 (1.038 - 1.294) | 0.008684 | 1846/ 5605    | 0.1666             | 0.1471                 |
|     |            |                       |           | Netherlands GWAS         | 1.036 (0.890 - 1.206) | 0.6491   | 840/ 2791     | 0.2192             | 0.2110                 |
|     |            |                       |           | US (PA) GWAS             | 1.223 (1.050 - 1.425) | 0.009782 | 724/ 1231     | 0.2055             | 0.1746                 |
|     |            |                       |           | Iceland deCODE GWAS      | 1.212 (1.027 - 1.429) | 0.02253  | 557/ 89235    | 0.2427             | 0.2130                 |
|     |            |                       |           |                          | OR (95% CI)           | Z-score  | P-value       | df (Q)             | HetI <sup>2</sup>      |
|     | Combined   | 1.185 (1.112 - 1.264) | 5.198     | 2.0E-07                  | 5                     | 18.1     | 0.296         |                    |                        |
| 12  | rs1385526  | 57532749              | LRP1      | NZ GWAS 1                | 0.863 (0.728 - 1.024) | 0.09069  | 608/ 612      | 0.3165             | 0.3491                 |
|     |            |                       |           | NZ GWAS 2                | 0.820 (0.659 - 1.021) | 0.07616  | 397/ 384      | 0.3043             | 0.3478                 |
|     |            |                       |           | Aneurysm Consortium GWAS | 0.798 (0.737 - 0.865) | 3.19E-08 | 1846/ 5605    | 0.3125             | 0.3629                 |
|     |            |                       |           | Netherlands GWAS         | 0.893 (0.788 - 1.011) | 0.07384  | 840/ 2791     | 0.3182             | 0.3452                 |
|     |            |                       |           | US (PA) GWAS             | 0.902 (0.790 - 1.030) | 0.1277   | 724/ 1231     | 0.3047             | 0.3269                 |
|     |            |                       |           | Iceland deCODE GWAS      | 0.904 (0.796 - 1.028) | 0.1233   | 557/ 89235    | 0.3945             | 0.4186                 |
|     |            |                       |           |                          | OR (95% CI)           | Z-score  | P-value       | df (Q)             | HetI <sup>2</sup>      |
|     | Combined   | 0.851 (0.809 - 0.895) | -6.295    | 3.1E-10                  | 5                     | 0        | 0.613         |                    |                        |
| 13  | rs9316871  | 22861921              | LINCO0540 | NZ GWAS 1                | 0.979 (0.804 - 1.190) | 0.8279   | 608/ 612      | 0.2048             | 0.2083                 |
|     |            |                       |           | NZ GWAS 2                | 0.678 (0.530 - 0.869) | 0.002047 | 397/ 384      | 0.1755             | 0.2388                 |
|     |            |                       |           | Aneurysm Consortium GWAS | 0.823 (0.750 - 0.903) | 3.92E-05 | 1846/ 5605    | 0.1923             | 0.2244                 |
|     |            |                       |           | Netherlands GWAS         | 0.891 (0.770 - 1.030) | 0.1191   | 840/ 2791     | 0.1931             | 0.2104                 |
|     |            |                       |           | US (PA) GWAS             | 0.880 (0.760 - 1.020) | 0.08905  | 724/ 1231     | 0.2103             | 0.2324                 |
|     |            |                       |           | Iceland deCODE GWAS      | 0.969 (0.821 - 1.143) | 0.7052   | 557/ 89235    | 0.1763             | 0.1809                 |
|     |            |                       |           |                          | OR (95% CI)           | Z-score  | P-value       | df (Q)             | HetI <sup>2</sup>      |
|     | Combined   | 0.864 (0.815 - 0.917) | -4.850    | 1.23E-06                 | 5                     | 33.2     | 0.187         |                    |                        |

| CHR      | SNP              | POSITION                 | Region | Cohort                   | OR (95% CI)           | P          | Case/ Control     | MAF <sub>AAA</sub> | MAF <sub>Control</sub> |
|----------|------------------|--------------------------|--------|--------------------------|-----------------------|------------|-------------------|--------------------|------------------------|
| 15       | rs17189674       | 89040591                 | DET1   | NZ GWAS 1                | 1.227 (0.966 - 1.559) | 0.09398    | 608/ 612          | 0.1410             | 0.1180                 |
|          |                  |                          |        | NZ GWAS 2                | 1.595 (1.140 - 2.230) | 0.006056   | 397/ 384          | 0.1273             | 0.0838                 |
|          |                  |                          |        | Aneurysm Consortium GWAS | 1.241 (1.096 - 1.406) | 6.51E-04   | 1846/ 5605        | 0.1123             | 0.0925                 |
|          |                  |                          |        | Netherlands GWAS         | 1.194 (0.991 - 1.438) | 0.06165    | 840/ 2791         | 0.1314             | 0.1148                 |
|          |                  |                          |        | US (PA) GWAS             | 1.109 (0.916 - 1.344) | 0.2889     | 724/ 1231         | 0.1167             | 0.1064                 |
|          |                  |                          |        | Iceland deCODE GWAS      | 1.181 (0.983 - 1.418) | 0.07515    | 557/ 89235        | 0.1645             | 0.1448                 |
|          |                  |                          |        | OR (95% CI)              |                       | Z-score    | P-value           | df (Q)             | HetI <sup>2</sup>      |
| Combined |                  | 1.216 (1.128 - 1.311)    | 5.091  | 3.6E-07                  | 5                     | 0          | 0.742             |                    |                        |
| 19       | rs6511720        | 11202306                 | LDLR   | NZ GWAS 1                | 0.611 (0.403 - 0.927) | 0.01942    | 608/ 612          | 0.04043            | 0.06452                |
|          |                  |                          |        | NZ GWAS 2                | 0.717 (0.514 - 1.001) | 0.05007    | 397/ 384          | 0.08564            | 0.11550                |
|          |                  |                          |        | Aneurysm Consortium GWAS | 0.764 (0.676 - 0.863) | 1.48E-05   | 1846/ 5605        | 0.09778            | 0.12430                |
|          |                  |                          |        | Netherlands GWAS         | 0.650 (0.529 - 0.797) | 3.74E-05   | 840/ 2791         | 0.08240            | 0.12150                |
|          |                  |                          |        | US (PA) GWAS             | 0.742 (0.608 - 0.905) | 0.003207   | 724/ 1231         | 0.09655            | 0.12590                |
|          |                  |                          |        | Iceland deCODE GWAS      | 0.855 (0.684 - 1.068) | 0.1668     | 557/ 89235        | 0.07480            | 0.08720                |
|          |                  |                          |        | OR (95% CI)              |                       | Z-score    | P-value           | df (Q)             | HetI <sup>2</sup>      |
| Combined |                  | 0.743 (0.685 - 0.806)    | -7.151 | 8.6E-13                  | 5                     | 0          | 0.829             |                    |                        |
| 19       | rs12980543       | 56096197                 | ZNF579 | NZ GWAS 1                | 1.011 (0.832 - 1.227) | 0.9147     | 608/ 612          | 0.2170             | 0.2152                 |
|          | rs11084402 proxy | 56093365                 |        | NZ GWAS 2                | 1.280 (1.006 - 1.628) | 0.04423    | 397/ 384          | 0.2418             | 0.1995                 |
|          |                  | Aneurysm Consortium GWAS |        | 1.077 (0.984 - 1.180)    | 0.1091                | 1846/ 5605 | 0.2153            | 0.2030             |                        |
|          |                  | Netherlands GWAS         |        | 1.217 (1.051 - 1.409)    | 0.00854               | 840/ 2791  | 0.2159            | 0.1824             |                        |
|          |                  | US (PA) GWAS             |        | 1.273 (1.094 - 1.481)    | 0.001733              | 724/ 1231  | 0.2131            | 0.1754             |                        |
|          |                  | Iceland deCODE GWAS      |        | 1.281 (1.059 - 1.549)    | 0.01071               | 557/ 89235 | 0.1734            | 0.1430             |                        |
|          |                  | OR (95% CI)              |        | Z-score                  | P-value               | df (Q)     | HetI <sup>2</sup> | HetPval            |                        |
| Combined |                  | 1.152 (1.086 - 1.223)    | 4.669  | 3.0E-06                  | 5                     | 33.2       | 0.187             |                    |                        |

| CHR      | SNP             | POSITION                 | Region                  | Cohort                   | OR (95% CI)           | P          | Case/ Control     | MAF <sub>AAA</sub> | MAF <sub>Control</sub> |
|----------|-----------------|--------------------------|-------------------------|--------------------------|-----------------------|------------|-------------------|--------------------|------------------------|
| 20       | rs6516091       | 6050622                  | near <i>FERMT1</i>      | NZ GWAS 1                | 1.263 (0.991 - 1.609) | 0.05848    | 608/ 612          | 0.1381             | 0.1126                 |
|          |                 |                          |                         | NZ GWAS 2                | 1.271 (0.931 - 1.734) | 0.13       | 397/ 384          | 0.1297             | 0.1050                 |
|          |                 |                          |                         | Aneurysm Consortium GWAS | 1.399 (1.261 - 1.551) | 1.73E-10   | 1846/ 5605        | 0.1655             | 0.1242                 |
|          |                 |                          |                         | Netherlands GWAS         | 1.187 (0.994 - 1.416) | 0.05749    | 840/ 2791         | 0.1298             | 0.1150                 |
|          |                 |                          |                         | US (PA) GWAS             | 1.186 (0.987 - 1.426) | 0.06916    | 724/ 1231         | 0.1290             | 0.1110                 |
|          |                 |                          |                         | Iceland deCODE GWAS      | 0.968 (0.783 - 1.197) | 0.7619     | 557/ 89235        | 0.0938             | 0.0966                 |
|          |                 |                          |                         | OR (95% CI)              |                       | Z-score    | P-value           | df (Q)             | HetI <sup>2</sup>      |
| Combined |                 | 1.262 (1.177 - 1.354)    | 6.525                   | 6.8E-11                  | 5                     | 56.2       | 0.044             |                    |                        |
| 20       | rs58749629      | 44571317                 | Near <i>MMP9/ZNF335</i> | NZ GWAS 1                | 1.062 (0.846 - 1.333) | 0.6044     | 608/ 612          | 0.1503             | 0.1427                 |
|          | rs3827066 proxy | 44586023                 |                         | NZ GWAS 2                | 1.101 (0.847 - 1.430) | 0.4723     | 397/ 384          | 0.1827             | 0.1688                 |
|          |                 | Aneurysm Consortium GWAS |                         | 1.237 (1.119 - 1.368)    | 2.97E-05              | 1846/ 5605 | 0.1743            | 0.1457             |                        |
|          |                 | Netherlands GWAS         |                         | 1.287 (1.099 - 1.506)    | 0.001752              | 840/ 2791  | 0.1761            | 0.1414             |                        |
|          |                 | US (PA) GWAS             |                         | 1.246 (1.067 - 1.456)    | 0.005513              | 724/ 1231  | 0.1972            | 0.1647             |                        |
|          |                 | Iceland deCODE GWAS      |                         | 1.325 (1.094 - 1.606)    | 0.003994              | 557/ 89235 | 0.1492            | 0.1193             |                        |
|          |                 | OR (95% CI)              |                         | Z-score                  | P-value               | df (Q)     | HetI <sup>2</sup> | HetPval            |                        |
| Combined |                 | 1.233 (1.156 - 1.314)    | 6.371                   | 1.9E-10                  | 5                     | 0          | 0.444             |                    |                        |
| 21       | rs2836411       | 39819830                 | <i>ERG</i>              | NZ GWAS 1                | 1.313 (1.113 - 1.548) | 0.001228   | 608/ 612          | 0.3980             | 0.3350                 |
|          |                 |                          |                         | NZ GWAS 2                | 1.076 (0.876 - 1.321) | 0.4862     | 397/ 384          | 0.3823             | 0.3652                 |
|          |                 |                          |                         | Aneurysm Consortium GWAS | 1.132 (1.048 - 1.223) | 0.00155    | 1846/ 5605        | 0.3814             | 0.3525                 |
|          |                 |                          |                         | Netherlands GWAS         | 1.204 (1.065 - 1.361) | 0.002983   | 840/ 2791         | 0.4016             | 0.3611                 |
|          |                 |                          |                         | US (PA) GWAS             | 1.232 (1.086 - 1.397) | 0.001164   | 724/ 1231         | 0.3821             | 0.3342                 |
|          |                 |                          |                         | Iceland deCODE GWAS      | 1.000 (0.878 - 1.139) | 0.9964     | 557/ 89235        | 0.3330             | 0.3331                 |
|          |                 |                          |                         | OR (95% CI)              |                       | Z-score    | P-value           | df (Q)             | HetI <sup>2</sup>      |
| Combined |                 | 1.149 (1.095 - 1.207)    | 5.573                   | 2.5E-08                  | 5                     | 30.1       | 0.209             |                    |                        |

| CHR | SNP       | POSITION  | Region  | Cohort                   | OR (95% CI)           | P        | Case/ Control | MAF <sub>AAA</sub> | MAF <sub>Control</sub> |
|-----|-----------|-----------|---------|--------------------------|-----------------------|----------|---------------|--------------------|------------------------|
| X   | RS5954362 | 140673423 | SPANXA1 | NZ GWAS 1                | 0.750 (0.556 - 1.007) | 0.05496  | 474/ 450      | 0.2372             | 0.2930                 |
|     |           |           |         | NZ GWAS 2                | 0.862 (0.586 - 1.269) | 0.4522   | 332/ 308      | 0.2310             | 0.2584                 |
|     |           |           |         | Aneurysm Consortium GWAS | 0.584 (0.499 - 0.685) | 1.81E-11 | 1815/ 2736    | 0.1894             | 0.2856                 |
|     |           |           |         |                          | OR (95% CI)           | Z-score  | P-value       | df (Q)             | HetI <sup>2</sup>      |
|     |           |           |         | Combined                 | 0.642 (0.563 - 0.732) | -6.105   | 1.0E-09       | 2                  | 3.91                   |
|     |           |           |         |                          |                       |          |               |                    | HetPval                |

**Online Table V:** Summary of results for the combined (using the Maentel–Haenzel fixed effect method) validation study cohorts for the lead SNPs at putative AAA associated loci. The SNPs with  $P < 5 \times 10^{-6}$  in the meta-analysis of 6 primary AAA GWAS datasets were genotyped in 8 different validation cohorts for a total of 5,232 AAA cases and 7,908 controls (see **Online Table II** for details on these cohorts). Results including MAFs for cases and controls in each individual cohort are shown in **Online Table VI**. Where a proxy SNP was typed the original lead SNP from the discovery study is shown above the proxy SNP typed in the validation study.

| Chr | SNP                        | Position  | Gene                                | Risk allele | Other allele | P                      | Direction | Phet  | $I^2$ |
|-----|----------------------------|-----------|-------------------------------------|-------------|--------------|------------------------|-----------|-------|-------|
| 1   | rs602633                   | 109821511 | Near <i>PSRC1 CELSR2 SORT1</i>      | T           | G            | 0.01                   | ----+---  | 0.027 | 55.8  |
| 1   | rs12133641                 | 154428283 | <i>IL6R</i>                         | A           | G            |                        |           |       |       |
|     | <i>rs4129267 proxySNP</i>  | 154426264 | <i>IL6R</i>                         | T           | C            | $1.81 \times 10^{-4}$  | +-----    | 0.294 | 17.2  |
| 1   | rs1795061                  | 214409280 | near <i>SMYD2</i>                   | T           | C            | $3.49 \times 10^{-4}$  | +-----+   | 0     | 70.3  |
| 2   | rs13382862                 | 20882449  | near <i>C2orf43</i> and <i>GDF7</i> | A           | G            | 0.360                  | -----+    | 0.278 | 19.2  |
| 4   | rs10029392                 | 5616048   | <i>EVC2</i>                         | T           | G            | 0.267                  | +--+---+  | 0.195 | 29.2  |
| 5   | rs12659791                 | 74757758  | <i>COL4A3BP</i>                     | T           | C            | 0.966                  | -+-----   | 0.749 | 0.0   |
| 6   | rs3176334                  | 36648364  | <i>CDKN1A</i>                       | C           | T            |                        |           |       |       |
|     | <i>rs733590 proxySNP</i>   | 36645203  | <i>CDKN1A</i>                       | T           | C            | 0.789                  | +++++--   | 0.754 | 0.0   |
| 8   | rs3110425                  | 107649626 | <i>OXR1</i>                         | T           | C            | 0.261                  | +-----+   | 0.268 | 20.4  |
| 9   | rs10757274                 | 22096055  | <i>CDKN2BAS1/ANRIL</i>              | A           | G            | $1.02 \times 10^{-21}$ | -----     | 0.001 | 64.2  |
| 9   | rs10985349                 | 124425243 | <i>DAB2IP</i>                       | T           | C            | $2.30 \times 10^{-5}$  | +++++++   | 0.4   | 3.9   |
| 12  | rs1385526                  | 57532749  | <i>LRP1</i>                         | C           | G            | 0.622                  | -----+    | 0.33  | 12.8  |
| 13  | rs9316871                  | 22861921  | <i>LINC00540</i>                    | A           | G            | $8.28 \times 10^{-5}$  | -----+    | 0.795 | 0.0   |
| 15  | rs17189674                 | 89040591  | <i>DET1</i>                         | A           | G            | 0.744                  | --++---+  | 0.102 | 41.5  |
| 19  | rs6511720                  | 11202306  | <i>LDLR</i>                         | T           | G            | $6.02 \times 10^{-4}$  | -----++   | 0.003 | 68.2  |
| 19  | rs12980543                 | 56096197  | <i>ZNF579</i>                       | A           | G            |                        |           |       |       |
|     | <i>rs11084402 proxySNP</i> | 56093365  | <i>ZNF579</i>                       | T           | C            | 0.364                  | +-----+   | 0.12  | 38.9  |
| 20  | rs6516091                  | 6050622   | near <i>FERMT1</i>                  | A           | G            | 0.867                  | +--+---+  | 0.104 | 41.1  |
| 20  | rs58749629                 | 44571317  | near <i>PCIF1 ZNF335 MMP9</i>       | A           | G            |                        |           |       |       |
|     | <i>rs3827066 proxySNP</i>  | 44586023  | near <i>PCIF1 ZNF335 MMP9</i>       | T           | C            | $2.00 \times 10^{-8}$  | +++++++   | 0.3   | 16.5  |
| 21  | rs2836411                  | 39819830  | <i>ERG</i>                          | T           | C            | 0.011                  | +++++++   | 0.203 | 28.3  |
| X   | rs5954362                  | 140673423 | <i>SPANXA1</i>                      | G           | C            | 0.172                  | -+---+    | 0.005 | 73.2  |

**Online Table VI:** Results of validation for the lead SNPs (combined using the Maentel–Haenzel fixed effect method) at putative AAA loci identified in the meta-analysis of GWAS. The SNPs with  $P < 5 \times 10^{-6}$  in the meta-analysis of 6 primary AAA GWAS datasets were genotyped in 8 different validation cohorts for a total of up to 5,232 AAA cases and 7,908 controls (see **Online Table II** for details on these cohorts). This table spans this and the following 5 pages. Where a proxy SNP is indicated the results are for that proxy SNP.

| Chromosome | SNP                           | POSITION               | Region                                  | Cohort           | OR (95% CI)                | Case/control   | MAFAAA          | MAFControl    | HWEControl     | HWEAAA           |
|------------|-------------------------------|------------------------|-----------------------------------------|------------------|----------------------------|----------------|-----------------|---------------|----------------|------------------|
| 1          | rs602633                      | 109821511              | <a href="#">Near PSRC1 CELSR2 SORT1</a> | AC               | 0.885 (0.781-1.002)        | 1236/2196      | 0.191           | 0.211         | 0.079          | 0.799            |
|            |                               |                        |                                         | US2              | 0.864 (0.757-0.987)        | 1157/1374      | 0.211           | 0.236         | 0.724          | 0.248            |
|            |                               |                        |                                         | NZ               | 0.933 (0.794-1.095)        | 753/1237       | 0.201           | 0.213         | 0.473          | 0.183            |
|            |                               |                        |                                         | Italy            | 1.201 (0.995-1.449)        | 718/636        | 0.220           | 0.190         | 0.200          | 0.210            |
|            |                               |                        |                                         | Poland           | 1.133 (0.904-1.421)        | 443/474        | 0.218           | 0.197         | 0.652          | 0.995            |
|            |                               |                        |                                         | eMERGE           | 0.784 (0.639-0.963)        | 330/1648       | 0.203           | 0.245         | 0.005          | 0.248            |
|            |                               |                        |                                         | Belgium          | 0.8 (0.591-1.082)          | 302/216        | 0.192           | 0.229         | 0.198          | 0.959            |
|            |                               |                        |                                         | Canada           | 0.803 (0.533-1.211)        | 126/118        | 0.230           | 0.271         | 0.881          | 0.870            |
|            |                               |                        |                                         |                  | <b>OR (95% CI)</b>         | <b>Z-score</b> | <b>P-value</b>  | <b>df (Q)</b> | <b>HetPVal</b> | <b>I-squared</b> |
|            |                               |                        |                                         | <b>Combined:</b> | <b>0.92 (0.863-0.98)</b>   | <b>-2.582</b>  | <b>0.010</b>    | <b>7</b>      | <b>0.027</b>   | <b>55.770</b>    |
| 1          | rs12133641<br>rs4129267 proxy | 154428283<br>154426264 | <a href="#">IL6R</a>                    | AC               | 1.001 (0.904-1.108)        | 1236/2196      | 0.386           | 0.386         | 0.706          | 0.293            |
|            |                               |                        |                                         | US2              | 0.879 (0.783-0.986)        | 1137/1324      | 0.369           | 0.400         | 0.798          | 0.689            |
|            |                               |                        |                                         | NZ               | 0.835 (0.732-0.954)        | 753/1237       | 0.377           | 0.420         | 0.155          | 0.022            |
|            |                               |                        |                                         | Italy            | 0.897 (0.765-1.052)        | 714/585        | 0.364           | 0.390         | 0.286          | 0.179            |
|            |                               |                        |                                         | Poland           | 0.925 (0.768-1.114)        | 480/481        | 0.353           | 0.371         | 0.731          | 0.000            |
|            |                               |                        |                                         | eMERGE           | 0.927 (0.781-1.099)        | 345/1724       | 0.354           | 0.371         | 0.137          | 0.840            |
|            |                               |                        |                                         | Belgium          | 0.767 (0.606-0.971)        | 334/256        | 0.361           | 0.424         | 0.440          | 0.410            |
|            |                               |                        |                                         | Canada           | 0.761 (0.541-1.072)        | 139/133        | 0.381           | 0.447         | 0.025          | 0.427            |
|            |                               |                        |                                         |                  | <b>OR (95% CI)</b>         | <b>Z-score</b> | <b>P-value</b>  | <b>df (Q)</b> | <b>HetPVal</b> | <b>I-squared</b> |
|            |                               |                        |                                         | <b>Combined:</b> | <b>0.904 (0.857-0.953)</b> | <b>-3.743</b>  | <b>1.81E-04</b> | <b>7</b>      | <b>0.294</b>   | <b>17.200</b>    |
| 1          | rs1795061                     | 214409280              | <a href="#">Near SMYD2</a>              | AC               | 1.171 (1.053-1.302)        | 1236/2196      | 0.332           | 0.298         | 0.869          | 0.360            |
|            |                               |                        |                                         | US2              | 0.91 (0.808-1.024)         | 1172/1386      | 0.301           | 0.321         | 0.469          | 0.892            |
|            |                               |                        |                                         | NZ               | 1.077 (0.939-1.236)        | 753/1237       | 0.336           | 0.319         | 0.060          | 0.026            |
|            |                               |                        |                                         | Italy            | 1.434 (1.21-1.698)         | 761/558        | 0.340           | 0.264         | 0.226          | 0.071            |
|            |                               |                        |                                         | Poland           | 1.025 (0.848-1.239)        | 470/487        | 0.332           | 0.326         | 0.823          | 0.025            |
|            |                               |                        |                                         | eMERGE           | 1.088 (0.915-1.294)        | 340/1679       | 0.347           | 0.328         | 0.216          | 0.991            |
|            |                               |                        |                                         | Belgium          | 1.28 (0.996-1.646)         | 335/260        | 0.327           | 0.275         | 0.605          | 0.583            |
|            |                               |                        |                                         | Canada           | 1.32 (0.916-1.905)         | 132/132        | 0.352           | 0.292         | 0.075          | 0.364            |
|            |                               |                        |                                         |                  | <b>OR (95% CI)</b>         | <b>Z-score</b> | <b>P-value</b>  | <b>df (Q)</b> | <b>HetPVal</b> | <b>I-squared</b> |
|            |                               |                        |                                         | <b>Combined:</b> | <b>1.105 (1.046-1.168)</b> | <b>3.576</b>   | <b>3.49E-04</b> | <b>7</b>      | <b>0.000</b>   | <b>70.300</b>    |

| Chromosome | SNP        | POSITION | Region                                | Cohort           | OR (95% CI)                | Case/control   | MAFAAA         | MAFControl    | HWEControl     | HWEAAA           |
|------------|------------|----------|---------------------------------------|------------------|----------------------------|----------------|----------------|---------------|----------------|------------------|
| 2          | rs13382862 | 20882449 | <a href="#">near C2orf43 and GDF7</a> | AC               | 0.942 (0.85-1.045)         | 1236/2196      | 0.358          | 0.372         | 0.224          | 0.156            |
|            |            |          |                                       | US2              | 0.94 (0.836-1.057)         | 1109/1386      | 0.346          | 0.360         | 0.103          | 0.291            |
|            |            |          |                                       | NZ               | 0.87 (0.759-0.997)         | 753/1237       | 0.335          | 0.366         | 0.140          | 0.741            |
|            |            |          |                                       | Italy            | 1.109 (0.931-1.321)        | 727/558        | 0.287          | 0.266         | 0.158          | 0.345            |
|            |            |          |                                       | Poland           | 1.099 (0.906-1.332)        | 450/452        | 0.366          | 0.344         | 0.465          | 0.098            |
|            |            |          |                                       | eMERGE           | 1.083 (0.913-1.285)        | 335/1645       | 0.388          | 0.369         | 0.970          | 0.918            |
|            |            |          |                                       | Belgium          | 1.024 (0.794-1.319)        | 310/256        | 0.310          | 0.305         | 0.821          | 0.209            |
|            |            |          |                                       | Canada           | 0.998 (0.705-1.413)        | 142/131        | 0.370          | 0.370         | 0.720          | 0.021            |
|            |            |          |                                       |                  | <b>OR (95% CI)</b>         | <b>Z-score</b> | <b>P-value</b> | <b>df (Q)</b> | <b>HetPVal</b> | <b>I-squared</b> |
|            |            |          |                                       | <b>Combined:</b> | <b>0.975 (0.923-1.029)</b> | <b>-0.915</b>  | <b>0.360</b>   | <b>7</b>      | <b>0.278</b>   | <b>19.156</b>    |
| 4          | rs10029392 | 5616048  | <a href="#">EVC2</a>                  | AC               | 1.014 (0.814-1.263)        | 1698/2209      | 0.044          | 0.043         | 0.655          | 0.110            |
|            |            |          |                                       | US2*             | 0.876 (0.678-1.132)        | 1169/1387      | 0.046          | 0.052         | 0.217          | 0.088            |
|            |            |          |                                       | NZ*              | 1.233 (0.92-1.651)         | 753/1237       | 0.057          | 0.047         | 0.809          | 0.106            |
|            |            |          |                                       | Italy            | 0.767 (0.588-0.999)        | 678/556        | 0.088          | 0.112         | 0.423          | 0.709            |
|            |            |          |                                       | Poland*          | 0.809 (0.6-1.092)          | 472/481        | 0.091          | 0.110         | 0.074          | 0.963            |
|            |            |          |                                       | eMERGE           | 0.921 (0.642-1.321)        | 343/1707       | 0.054          | 0.058         | 0.998          | 0.006            |
|            |            |          |                                       | Belgium*         | 1.09 (0.545-2.18)          | 335/225        | 0.030          | 0.027         | 0.652          | 0.573            |
|            |            |          |                                       | Canada*          | 2.2 (0.754-6.422)          | 133/130        | 0.041          | 0.019         | 0.823          | 0.091            |
|            |            |          |                                       |                  | <b>OR (95% CI)</b>         | <b>Z-score</b> | <b>P-value</b> | <b>df (Q)</b> | <b>HetPVal</b> | <b>I-squared</b> |
|            |            |          |                                       | <b>Combined:</b> | <b>0.94 (0.843-1.049)</b>  | <b>-1.111</b>  | <b>0.267</b>   | <b>7</b>      | <b>0.195</b>   | <b>29.200</b>    |
| 5          | rs12659791 | 74757758 | <a href="#">COL4A3BP</a>              | AC               | 0.963 (0.839-1.105)        | 1236/2196      | 0.149          | 0.154         | 0.071          | 0.307            |
|            |            |          |                                       | US2              | 1.063 (0.91-1.242)         | 1151/1371      | 0.153          | 0.145         | 0.398          | 0.663            |
|            |            |          |                                       | NZ               | 0.959 (0.802-1.148)        | 753/1237       | 0.152          | 0.158         | 0.149          | 0.581            |
|            |            |          |                                       | Italy            | 1.051 (0.83-1.332)         | 732/439        | 0.151          | 0.145         | 0.484          | 0.177            |
|            |            |          |                                       | Poland           | 0.976 (0.771-1.236)        | 486/488        | 0.169          | 0.172         | 0.002          | 0.553            |
|            |            |          |                                       | eMERGE           | 0.979 (0.773-1.241)        | 345/1723       | 0.138          | 0.140         | 0.818          | 0.807            |
|            |            |          |                                       | Belgium          | 0.91 (0.669-1.237)         | 339/266        | 0.156          | 0.169         | 0.298          | 0.126            |
|            |            |          |                                       | Canada           | 1.62 (0.898-2.921)         | 105/91         | 0.167          | 0.110         | 0.239          | 0.953            |
|            |            |          |                                       |                  | <b>OR (95% CI)</b>         | <b>Z-score</b> | <b>P-value</b> | <b>df (Q)</b> | <b>HetPVal</b> | <b>I-squared</b> |
|            |            |          |                                       | <b>Combined:</b> | <b>0.998 (0.929-1.073)</b> | <b>-0.043</b>  | <b>0.966</b>   | <b>7</b>      | <b>0.749</b>   | <b>0.000</b>     |

| Chromosome | SNP                         | POSITION             | Region                           | Cohort           | OR (95% CI)                | Case/control   | MAFAAA          | MAFControl    | HWEControl     | HWEAAA           |
|------------|-----------------------------|----------------------|----------------------------------|------------------|----------------------------|----------------|-----------------|---------------|----------------|------------------|
| 6          | rs3176334<br>rs733590 proxy | 36648364<br>36645203 | <a href="#">CDKN1A</a>           | AC               | 1.042 (0.94-1.156)         | 1236/2196      | 0.356           | 0.347         | 0.523          | 0.412            |
|            |                             |                      |                                  | US2              | 1.006 (0.897-1.127)        | 1157/1374      | 0.379           | 0.378         | 0.871          | 0.072            |
|            |                             |                      |                                  | NZ               | 1.026 (0.894-1.178)        | 753/1237       | 0.333           | 0.327         | 0.268          | 0.428            |
|            |                             |                      |                                  | Italy            | 0.978 (0.831-1.149)        | 733/546        | 0.371           | 0.376         | 0.163          | 0.992            |
|            |                             |                      |                                  | Poland           | 1.021 (0.846-1.232)        | 455/453        | 0.398           | 0.393         | 0.702          | 0.557            |
|            |                             |                      |                                  | eMERGE           | 0.893 (0.748-1.066)        | 318/1599       | 0.357           | 0.383         | 0.525          | 0.391            |
|            |                             |                      |                                  | Belgium          | 1.127 (0.888-1.43)         | 331/254        | 0.394           | 0.366         | 0.776          | 0.917            |
|            |                             |                      |                                  | Canada           | 0.84 (0.585-1.205)         | 142/132        | 0.296           | 0.333         | 0.361          | 0.150            |
|            |                             |                      |                                  |                  | <b>OR (95% CI)</b>         | <b>Z-score</b> | <b>P-value</b>  | <b>df (Q)</b> | <b>HetPVal</b> | <b>I-squared</b> |
|            |                             |                      |                                  | <b>Combined:</b> | <b>1.007 (0.955-1.063)</b> | <b>0.2678</b>  | <b>0.789</b>    | <b>7</b>      | <b>0.754</b>   | <b>0.000</b>     |
| 8          | rs3110425                   | 107649626            | OXR1                             | AC               | 1.079 (0.974-1.196)        | 1225/2167      | 0.374           | 0.356         | 0.111          | 0.315            |
|            |                             |                      |                                  | US2              | 0.933 (0.826-1.053)        | 987/1323       | 0.355           | 0.371         | 0.568          | 0.248            |
|            |                             |                      |                                  | NZ               | 1.088 (0.949-1.247)        | 704/1174       | 0.382           | 0.361         | 0.107          | 0.279            |
|            |                             |                      |                                  | Italy            | 1.058 (0.878-1.275)        | 532/445        | 0.359           | 0.346         | 0.883          | 0.226            |
|            |                             |                      |                                  | Poland           | 1.214 (0.999-1.475)        | 449/457        | 0.363           | 0.319         | 0.770          | 0.164            |
|            |                             |                      |                                  | eMERGE           | 0.942 (0.794-1.118)        | 342/1711       | 0.360           | 0.373         | 0.971          | 0.448            |
|            |                             |                      |                                  | Belgium          | 0.910 (0.713-1.163)        | 313/246        | 0.356           | 0.378         | 0.558          | 0.672            |
|            |                             |                      |                                  | Canada           | 1.036 (0.725-1.481)        | 126/118        | 0.230           | 0.271         | 0.881          | 0.870            |
|            |                             |                      |                                  |                  | <b>OR (95% CI)</b>         | <b>Z-score</b> | <b>P-value</b>  | <b>df (Q)</b> | <b>HetPVal</b> | <b>I-squared</b> |
|            |                             |                      |                                  | <b>Combined:</b> | <b>1.032 (0.977-1.090)</b> | <b>1.124</b>   | <b>0.261</b>    | <b>7</b>      | <b>0.268</b>   | <b>20.420</b>    |
| 9          | rs10757274                  | 22096055             | <a href="#">ANRIL</a> CDKN2BAS1/ | AC               | 0.831 (0.752-0.917)        | 1236/2196      | 0.456           | 0.502         | 0.273          | 0.163            |
|            |                             |                      |                                  | US               | 0.748 (0.67-0.836)         | 1162/1382      | 0.451           | 0.523         | 0.099          | 0.622            |
|            |                             |                      |                                  | NZ               | 0.885 (0.777-1.007)        | 753/1237       | 0.466           | 0.497         | 0.561          | 0.038            |
|            |                             |                      |                                  | Italy            | 0.63 (0.527-0.753)         | 540/464        | 0.371           | 0.484         | 0.236          | 0.052            |
|            |                             |                      |                                  | Poland           | 0.679 (0.565-0.816)        | 451/468        | 0.463           | 0.560         | 0.616          | 0.551            |
|            |                             |                      |                                  | eMERGE           | 0.68 (0.576-0.804)         | 336/1696       | 0.435           | 0.530         | 0.333          | 0.922            |
|            |                             |                      |                                  | Belgium          | 0.959 (0.757-1.214)        | 313/248        | 0.455           | 0.466         | 0.333          | 0.977            |
|            |                             |                      |                                  | Canada           | 0.674 (0.468-0.97)         | 117/117        | 0.427           | 0.526         | 0.535          | 0.320            |
|            |                             |                      |                                  |                  | <b>OR (95% CI)</b>         | <b>Z-score</b> | <b>P-value</b>  | <b>df (Q)</b> | <b>HetPVal</b> | <b>I-squared</b> |
|            |                             |                      |                                  | <b>Combined:</b> | <b>0.774 (0.735-0.816)</b> | <b>-9.575</b>  | <b>1.02E-21</b> | <b>7</b>      | <b>0.001</b>   | <b>64.200</b>    |

| Chromosome | SNP        | POSITION  | Region                    | Cohort           | OR (95% CI)                | Case/control   | MAFAAA          | MAFControl    | HWEControl     | HWEAAA           |
|------------|------------|-----------|---------------------------|------------------|----------------------------|----------------|-----------------|---------------|----------------|------------------|
| 9          | rs10985349 | 124425243 | <a href="#">DAB2IP</a>    | AC               | 0.998 (0.876-1.135)        | 1236/2196      | 0.179           | 0.179         | 0.878          | 0.696            |
|            |            |           |                           | US2              | 1.208 (1.051-1.387)        | 1171/1385      | 0.211           | 0.181         | 0.625          | 0.165            |
|            |            |           |                           | NZ               | 1.266 (1.072-1.495)        | 753/1237       | 0.199           | 0.164         | 0.865          | 0.720            |
|            |            |           |                           | Italy            | 1.227 (0.975-1.544)        | 729/620        | 0.138           | 0.115         | 0.061          | 0.327            |
|            |            |           |                           | Poland           | 1.182 (0.947-1.476)        | 485/488        | 0.215           | 0.189         | 0.322          | 0.228            |
|            |            |           |                           | eMERGE           | 1.215 (0.969-1.523)        | 299/1544       | 0.189           | 0.161         | 0.346          | 0.381            |
|            |            |           |                           | Belgium          | 1.139 (0.848-1.53)         | 338/266        | 0.192           | 0.173         | 0.682          | 0.220            |
|            |            |           |                           | Canada           | 1.304 (0.861-1.975)        | 149/134        | 0.221           | 0.179         | 0.177          | 0.116            |
|            |            |           |                           |                  | <b>OR (95% CI)</b>         | <b>Z-score</b> | <b>P-value</b>  | <b>df (Q)</b> | <b>HetPVal</b> | <b>I-squared</b> |
|            |            |           |                           | <b>Combined:</b> | <b>1.155 (1.081-1.235)</b> | <b>4.233</b>   | <b>2.30E-05</b> | <b>7</b>      | <b>0.400</b>   | <b>3.900</b>     |
| 12         | rs1385526  | 57532749  | <a href="#">LRP1</a>      | AC               | 0.983 (0.886-1.092)        | 1236/2196      | 0.339           | 0.343         | 0.293          | 0.297            |
|            |            |           |                           | US2              | 0.905 (0.804-1.019)        | 1161/1382      | 0.306           | 0.328         | 0.668          | 0.221            |
|            |            |           |                           | NZ               | 0.918 (0.801-1.052)        | 753/1237       | 0.333           | 0.352         | 0.160          | 0.840            |
|            |            |           |                           | Italy            | 1.135 (0.942-1.366)        | 509/493        | 0.351           | 0.323         | 0.072          | 0.392            |
|            |            |           |                           | Poland           | 1.058 (0.875-1.28)         | 453/480        | 0.359           | 0.346         | 0.083          | 0.580            |
|            |            |           |                           | eMERGE           | 1.124 (0.944-1.339)        | 342/1695       | 0.336           | 0.311         | 0.695          | 0.170            |
|            |            |           |                           | Belgium          | 0.966 (0.749-1.244)        | 324/246        | 0.306           | 0.313         | 0.744          | 0.647            |
|            |            |           |                           | Canada           | 1.031 (0.706-1.506)        | 132/120        | 0.311           | 0.304         | 0.181          | 0.607            |
|            |            |           |                           |                  | <b>OR (95% CI)</b>         | <b>Z-score</b> | <b>P-value</b>  | <b>df (Q)</b> | <b>HetPVal</b> | <b>I-squared</b> |
|            |            |           |                           | <b>Combined:</b> | <b>0.986 (0.933-1.042)</b> | <b>-0.493</b>  | <b>0.622</b>    | <b>7</b>      | <b>0.330</b>   | <b>12.800</b>    |
| 13         | rs9316871  | 22861921  | <a href="#">LINC00540</a> | AC               | 0.905 (0.801-1.023)        | 1236/2196      | 0.199           | 0.216         | 0.094          | 0.193            |
|            |            |           |                           | US2              | 0.845 (0.738-0.966)        | 1176/1384      | 0.202           | 0.231         | 0.624          | 0.052            |
|            |            |           |                           | NZ               | 0.834 (0.711-0.978)        | 753/1237       | 0.195           | 0.225         | 0.210          | 0.727            |
|            |            |           |                           | Italy            | 0.925 (0.776-1.102)        | 621/646        | 0.262           | 0.278         | 0.178          | 0.107            |
|            |            |           |                           | Poland           | 0.884 (0.721-1.085)        | 469/483        | 0.251           | 0.274         | 0.222          | 0.038            |
|            |            |           |                           | eMERGE           | 1.008 (0.828-1.226)        | 345/1724       | 0.223           | 0.222         | 0.049          | 0.954            |
|            |            |           |                           | Belgium          | 0.79 (0.592-1.053)         | 330/251        | 0.185           | 0.223         | 0.854          | 0.920            |
|            |            |           |                           | Canada           | 0.798 (0.515-1.235)        | 133/125        | 0.177           | 0.212         | 0.004          | 0.271            |
|            |            |           |                           |                  | <b>OR (95% CI)</b>         | <b>Z-score</b> | <b>P-value</b>  | <b>df (Q)</b> | <b>HetPVal</b> | <b>I-squared</b> |
|            |            |           |                           | <b>Combined:</b> | <b>0.883 (0.83-0.94)</b>   | <b>-3.936</b>  | <b>8.28E-05</b> | <b>7</b>      | <b>0.795</b>   | <b>0.000</b>     |

| Chromosome | SNP                            | POSITION             | Region                                                     | Cohort           | OR (95% CI)                | Case/control   | MAFAAA          | MAFControl    | HWEControl     | HWEAAA           |
|------------|--------------------------------|----------------------|------------------------------------------------------------|------------------|----------------------------|----------------|-----------------|---------------|----------------|------------------|
| 15         | rs17189674                     | 89040591             | <a href="#">DET1</a>                                       | AC               | 0.889 (0.763-1.036)        | 1236/2196      | 0.115           | 0.128         | 0.264          | 0.949            |
|            |                                |                      |                                                            | US2              | 0.934 (0.781-1.116)        | 1170/1381      | 0.104           | 0.110         | 0.000          | 0.846            |
|            |                                |                      |                                                            | NZ               | 1.301 (1.065-1.588)        | 753/1237       | 0.130           | 0.103         | 0.499          | 0.429            |
|            |                                |                      |                                                            | Italy            | 1.115 (0.862-1.441)        | 616/872        | 0.127           | 0.116         | 0.113          | 0.276            |
|            |                                |                      |                                                            | Poland           | 0.912 (0.686-1.212)        | 488/489        | 0.105           | 0.113         | 0.559          | 0.260            |
|            |                                |                      |                                                            | eMERGE           | 1.072 (0.815-1.411)        | 320/1649       | 0.108           | 0.101         | 0.553          | 0.114            |
|            |                                |                      |                                                            | Belgium          | 1.214 (0.849-1.737)        | 340/266        | 0.125           | 0.105         | 0.973          | 0.403            |
|            |                                |                      |                                                            | Canada           | 0.927 (0.557-1.542)        | 201/137        | 0.113           | 0.120         | 0.105          | 0.944            |
|            |                                |                      |                                                            |                  | <b>OR (95% CI)</b>         | <b>Z-score</b> | <b>P-value</b>  | <b>df (Q)</b> | <b>HetPVal</b> | <b>I-squared</b> |
|            |                                |                      |                                                            | <b>Combined:</b> | <b>1.014 (0.935-1.099)</b> | <b>0.327</b>   | <b>0.744</b>    | <b>7</b>      | <b>0.102</b>   | <b>41.500</b>    |
| 19         | rs6511720                      | 11202306             | <a href="#">LDLR</a>                                       | AC               | 0.969 (0.826-1.136)        | 1236/2196      | 0.107           | 0.110         | 0.144          | 0.384            |
|            |                                |                      |                                                            | US2              | 0.93 (0.792-1.092)         | 1166/1383      | 0.132           | 0.141         | 0.000          | 0.000            |
|            |                                |                      |                                                            | NZ               | 0.849 (0.69-1.045)         | 753/1237       | 0.103           | 0.119         | 0.737          | 0.454            |
|            |                                |                      |                                                            | Italy            | 0.566 (0.436-0.736)        | 667/567        | 0.079           | 0.132         | 0.736          | 0.242            |
|            |                                |                      |                                                            | Poland           | 0.607 (0.454-0.812)        | 477/479        | 0.087           | 0.136         | 0.944          | 0.132            |
|            |                                |                      |                                                            | eMERGE           | 0.933 (0.709-1.227)        | 320/1639       | 0.108           | 0.101         | 0.553          | 0.114            |
|            |                                |                      |                                                            | Belgium          | 1.162 (0.817-1.653)        | 336/260        | 0.129           | 0.113         | 0.102          | 0.079            |
|            |                                |                      |                                                            | Canada           | 1.025 (0.63-1.67)          | 141/133        | 0.138           | 0.135         | 0.676          | 0.231            |
|            |                                |                      |                                                            |                  | <b>OR (95% CI)</b>         | <b>Z-score</b> | <b>P-value</b>  | <b>df (Q)</b> | <b>HetPVal</b> | <b>I-squared</b> |
|            |                                |                      |                                                            | <b>Combined:</b> | <b>0.868 (0.801-0.941)</b> | <b>-3.431</b>  | <b>6.02E-04</b> | <b>7</b>      | <b>0.003</b>   | <b>68.200</b>    |
| 19         | rs12980543<br>rs11084402 proxy | 56096197<br>56093365 | <a href="#">near ZNF579</a><br><a href="#">near ZNF579</a> | AC               | 1.033 (0.913-1.169)        | 1217/2169      | 0.205           | 0.199         | 0.239          | 0.604            |
|            |                                |                      |                                                            | US2              | 0.889 (0.771-1.025)        | 1164/1386      | 0.176           | 0.193         | 0.216          | 0.988            |
|            |                                |                      |                                                            | NZ               | 1.113 (0.953-1.3)          | 737/1217       | 0.230           | 0.212         | 0.665          | 0.832            |
|            |                                |                      |                                                            | Italy            | 1.075 (0.871-1.326)        | 648/503        | 0.196           | 0.185         | 0.124          | 0.203            |
|            |                                |                      |                                                            | Poland           | 1.014 (0.802-1.281)        | 474/485        | 0.177           | 0.176         | 0.737          | 0.780            |
|            |                                |                      |                                                            | eMERGE           | 1.145 (0.935-1.402)        | 344/1723       | 0.209           | 0.188         | 0.967          | 0.200            |
|            |                                |                      |                                                            | Belgium          | 1.293 (0.97-1.722)         | 337/262        | 0.223           | 0.181         | 0.068          | 0.140            |
|            |                                |                      |                                                            | Canada           | 0.73 (0.486-1.096)         | 135/125        | 0.207           | 0.264         | 0.130          | 0.142            |
|            |                                |                      |                                                            |                  | <b>OR (95% CI)</b>         | <b>Z-score</b> | <b>P-value</b>  | <b>df (Q)</b> | <b>HetPVal</b> | <b>I-squared</b> |
|            |                                |                      |                                                            | <b>Combined:</b> | <b>1.03 (0.966-1.099)</b>  | <b>0.908</b>   | <b>0.364</b>    | <b>7.000</b>  | <b>0.120</b>   | <b>38.900</b>    |

| Chromosome | SNP                           | POSITION             | Region                                                                           | Cohort           | OR (95% CI)                | Case/control   | MAFAAA          | MAFControl    | HWEControl     | HWEAAA           |
|------------|-------------------------------|----------------------|----------------------------------------------------------------------------------|------------------|----------------------------|----------------|-----------------|---------------|----------------|------------------|
| 20         | rs6516091                     | 6050622              | <a href="#">near FERMT1</a>                                                      | AC               | 1.112 (0.961-1.287)        | 1236/2196      | 0.136           | 0.124         | 0.911          | 0.431            |
|            |                               |                      |                                                                                  | US2              | 0.901 (0.768-1.057)        | 1173/1384      | 0.132           | 0.144         | 0.625          | 0.149            |
|            |                               |                      |                                                                                  | NZ               | 1.094 (0.9-1.33)           | 753/1237       | 0.131           | 0.121         | 0.682          | 0.424            |
|            |                               |                      |                                                                                  | Italy            | 0.834 (0.667-1.043)        | 715/589        | 0.137           | 0.160         | 0.357          | 0.152            |
|            |                               |                      |                                                                                  | Poland           | 0.824 (0.619-1.096)        | 485/488        | 0.100           | 0.119         | 0.363          | 0.002            |
|            |                               |                      |                                                                                  | eMERGE           | 0.94 (0.741-1.192)         | 343/1716       | 0.137           | 0.145         | 0.047          | 0.511            |
|            |                               |                      |                                                                                  | Belgium          | 1.355 (0.947-1.939)        | 339/266        | 0.133           | 0.102         | 0.065          | 0.153            |
|            |                               |                      |                                                                                  | Canada           | 1.089 (0.671-1.768)        | 149/137        | 0.138           | 0.128         | 0.857          | 0.415            |
|            |                               |                      |                                                                                  |                  | <b>OR (95% CI)</b>         | <b>Z-score</b> | <b>P-value</b>  | <b>df (Q)</b> | <b>HetPVal</b> | <b>I-squared</b> |
|            |                               |                      |                                                                                  | <b>Combined:</b> | <b>0.994 (0.921-1.072)</b> | <b>-0.167</b>  | <b>0.867</b>    | <b>7</b>      | <b>0.104</b>   | <b>41.100</b>    |
| 20         | rs58749629<br>rs3827066 proxy | 44571317<br>44586023 | <a href="#">near PCIF1 ZNF335 MMP9</a><br><a href="#">near PCIF1 ZNF335 MMP9</a> | AC               | 1.076 (0.94-1.233)         | 1236/2196      | 0.160           | 0.151         | 0.688          | 0.617            |
|            |                               |                      |                                                                                  | US2              | 1.197 (1.035-1.385)        | 1171/1384      | 0.185           | 0.160         | 0.510          | 0.814            |
|            |                               |                      |                                                                                  | NZ               | 1.372 (1.153-1.632)        | 753/1237       | 0.185           | 0.142         | 0.132          | 0.899            |
|            |                               |                      |                                                                                  | Italy            | 1.263 (1.05-1.518)         | 709/579        | 0.256           | 0.214         | 0.380          | 0.275            |
|            |                               |                      |                                                                                  | Poland           | 1.373 (1.092-1.728)        | 487/486        | 0.210           | 0.163         | 0.958          | 0.907            |
|            |                               |                      |                                                                                  | eMERGE           | 1.077 (0.86-1.348)         | 345/1713       | 0.159           | 0.150         | 0.160          | 0.926            |
|            |                               |                      |                                                                                  | Belgium          | 1.291 (0.956-1.743)        | 340/265        | 0.196           | 0.158         | 0.280          | 0.733            |
|            |                               |                      |                                                                                  | Canada           | 1.469 (0.983-2.197)        | 146/132        | 0.260           | 0.193         | 0.023          | 0.028            |
|            |                               |                      |                                                                                  |                  | <b>OR (95% CI)</b>         | <b>Z-score</b> | <b>P-value</b>  | <b>df (Q)</b> | <b>HetPVal</b> | <b>I-squared</b> |
|            |                               |                      |                                                                                  | <b>Combined:</b> | <b>1.213 (1.134-1.298)</b> | <b>5.616</b>   | <b>2.00E-08</b> | <b>7</b>      | <b>0.300</b>   | <b>16.500</b>    |
| 21         | rs2836411                     | 39819830             | <a href="#">ERG</a>                                                              | AC               | 1.05 (0.947-1.164)         | 1236/2196      | 0.367           | 0.355         | 0.409          | 0.483            |
|            |                               |                      |                                                                                  | US2              | 1.085 (0.966-1.218)        | 1171/1382      | 0.350           | 0.331         | 0.073          | 0.877            |
|            |                               |                      |                                                                                  | NZ               | 1.171 (1.023-1.339)        | 753/1237       | 0.387           | 0.351         | 0.733          | 0.258            |
|            |                               |                      |                                                                                  | Italy            | 0.898 (0.757-1.065)        | 706/625        | 0.263           | 0.285         | 0.088          | 0.332            |
|            |                               |                      |                                                                                  | Poland           | 1.125 (0.935-1.354)        | 482/484        | 0.380           | 0.352         | 0.990          | 0.769            |
|            |                               |                      |                                                                                  | eMERGE           | 1.045 (0.88-1.241)         | 345/1724       | 0.349           | 0.339         | 0.485          | 0.797            |
|            |                               |                      |                                                                                  | Belgium          | 1.01 (0.797-1.281)         | 339/264        | 0.358           | 0.356         | 0.224          | 0.715            |
|            |                               |                      |                                                                                  | Canada           | 1.457 (1.04-2.041)         | 150/137        | 0.440           | 0.350         | 0.422          | 0.314            |
|            |                               |                      |                                                                                  |                  | <b>OR (95% CI)</b>         | <b>Z-score</b> | <b>P-value</b>  | <b>df (Q)</b> | <b>HetPVal</b> | <b>I-squared</b> |
|            |                               |                      |                                                                                  | <b>Combined:</b> | <b>1.072 (1.016-1.131)</b> | <b>2.533</b>   | <b>0.011</b>    | <b>7</b>      | <b>0.203</b>   | <b>28.300</b>    |
| X          | rs5954362                     | 140673423            | <a href="#">SPANXA1</a>                                                          | Males only       |                            |                |                 |               |                |                  |
|            |                               |                      |                                                                                  | NZ               | 0.816 (0.636-1.047)        | 585/762        | 0.248           | 0.288         |                |                  |
|            |                               |                      |                                                                                  | Belgium          | 1.301 (0.972-1.741)        | 319/183        | 0.310           | 0.257         |                |                  |
|            |                               |                      |                                                                                  | Canada           | 0.536 (0.294-0.978)        | 155/32         | 0.272           | 0.411         |                |                  |
|            |                               |                      |                                                                                  | eMERGE           | 1.189 (1.044-1.353)        | 1145/1134      | 0.311           | 0.276         |                |                  |
|            |                               |                      |                                                                                  | Poland           | 0.948 (0.759-1.186)        | 426/355        | 0.286           | 0.297         |                |                  |
|            |                               |                      |                                                                                  |                  | <b>OR (95% CI)</b>         | <b>Z-score</b> | <b>P-value</b>  | <b>df (Q)</b> | <b>HetPVal</b> | <b>I-squared</b> |
|            |                               |                      |                                                                                  | <b>Combined:</b> | <b>1.069 (0.972-1.175)</b> | <b>1.366</b>   | <b>0.172</b>    | <b>4</b>      | <b>0.005</b>   | <b>73.200</b>    |



**Online Table VIII:** Sensitivity analysis comparing results from the combined GWAS meta-analysis and validation studies using a fixed effects model with a random-effects model. Results for loci surpassing the threshold for genome-wide significance are shown in bold. \*Loci previously identified as associated with AAA

| Chr | SNP                | Position  | Gene                                | Minor allele | Other allele | MAF   | df | HetPVal                | I <sup>2</sup> | Fixed effects model          |                              | Random effects model         |                              |
|-----|--------------------|-----------|-------------------------------------|--------------|--------------|-------|----|------------------------|----------------|------------------------------|------------------------------|------------------------------|------------------------------|
|     |                    |           |                                     |              |              |       |    |                        |                | OR (95% CI)                  | P-value                      | OR (95% CI)                  | P-value                      |
| 1*  | rs602633           | 109821511 | Near <i>PSRC1 CELSR2 SORT1</i>      | T            | G            | 0.199 | 13 | 7.60x10 <sup>-03</sup> | 54.5           | <b>0.879 (0.842 - 0.918)</b> | <b>6.58x10<sup>-09</sup></b> | <b>0.881 (0.822 - 0.943)</b> | <b>3.18x10<sup>-9</sup></b>  |
| 1*  | rs12133641         | 154428283 | <i>IL6R</i>                         | A            | G            |       |    |                        |                |                              |                              |                              |                              |
| 1   | rs4129267 (proxy)  | 154426264 | <i>IL6R</i>                         | T            | C            | 0.370 | 13 | 0.478                  | 0.0            | <b>0.876 (0.846 - 0.908)</b> | <b>4.76x10<sup>-13</sup></b> | <b>0.876 (0.846 - 0.908)</b> | <b>1.03x10<sup>-12</sup></b> |
| 1   | rs1795061          | 214409280 | near <i>SMYD2</i>                   | T            | C            | 0.336 | 13 | 1.14x10 <sup>-03</sup> | 61.9           | <b>1.131 (1.090 - 1.174)</b> | <b>8.80x10<sup>-11</sup></b> | <b>1.142 (1.07 - 1.218)</b>  | <b>3.47x10<sup>-12</sup></b> |
| 2   | rs13382862         | 20882449  | near <i>C2orf43</i> and <i>GDF7</i> | A            | G            | 0.341 | 13 | 8.01x10 <sup>-02</sup> | 37.1           | 0.913 (0.880 - 0.947)        | 1.3x10 <sup>-06</sup>        | 0.921 (0.877 - 0.968)        | 2.05x10 <sup>-6</sup>        |
| 4   | rs10029392         | 5616048   | <i>EVC2</i>                         | T            | G            | 0.052 | 13 | 6.51x10 <sup>-04</sup> | 63.6           | 1.107 (1.022 - 1.198)        | 1.25x10 <sup>-02</sup>       | 1.120 (0.973 - 1.289)        | 1.88x10 <sup>-4</sup>        |
| 5   | rs12659791         | 74757758  | <i>COL4A3BP</i>                     | T            | C            | 0.159 | 13 | 1.69x10 <sup>-02</sup> | 50.1           | 1.098 (1.046 - 1.153)        | 1.8x10 <sup>-04</sup>        | 1.071 (0.993 - 1.156)        | 8.18x10 <sup>-6</sup>        |
| 6   | rs3176334          | 36648364  | <i>CDKN1A</i>                       | T            | C            |       |    |                        |                |                              |                              |                              |                              |
| 6   | rs733590 (proxy)   | 36645203  | <i>CDKN1A</i>                       | T            | C            | 0.367 | 13 | 0.183                  | 25.2           | 1.070 (1.031 - 1.11)         | 3.33x10 <sup>-04</sup>       | 1.064 (1.017 - 1.112)        | 5.06x10 <sup>-4</sup>        |
| 9*  | rs10757274         | 22096055  | <i>CDKN2BAS1/ANRIL</i>              | A            | G            | 0.351 | 13 | 5.94x10 <sup>-03</sup> | 55.6           | <b>0.806 (0.778 - 0.834)</b> | <b>1.54x10<sup>-33</sup></b> | <b>0.797 (0.753 - 0.843)</b> | <b>1.21x10<sup>-33</sup></b> |
| 9*  | rs10985349         | 124425243 | <i>DAB2IP</i>                       | T            | C            | 0.462 | 13 | 3.52x10 <sup>-01</sup> | 9.2            | <b>1.171 (1.118 - 1.226)</b> | <b>2.4x10<sup>-11</sup></b>  | <b>1.174 (1.117 - 1.233)</b> | <b>4.47x10<sup>-11</sup></b> |
| 12* | rs1385526          | 57532749  | <i>LRP1</i>                         | C            | G            | 0.195 | 13 | 9.38x10 <sup>-03</sup> | 53.4           | 0.910 (0.877 - 0.944)        | 6.4x10 <sup>-07</sup>        | 0.930 (0.877 - 0.986)        | 6.541x10 <sup>-8</sup>       |
| 13  | rs9316871          | 22861921  | <i>LINC00540</i>                    | A            | G            | 0.328 | 13 | 0.488                  | 0.0            | <b>0.873 (0.837 - 0.911)</b> | <b>4.8x10<sup>-10</sup></b>  | <b>0.873 (0.837 - 0.911)</b> | <b>9.98x10<sup>-10</sup></b> |
| 15  | rs17189674         | 89040591  | <i>DET1</i>                         | A            | G            | 0.201 | 13 | 1.71x10 <sup>-02</sup> | 50.0           | 1.118 (1.058 - 1.181)        | 7.59x10 <sup>-05</sup>       | 1.120 (1.031 - 1.217)        | 1.26x10 <sup>-5</sup>        |
| 19* | rs6511720          | 11202306  | <i>LDLR</i>                         | T            | G            | 0.122 | 13 | 1.53x10 <sup>-03</sup> | 61.0           | <b>0.804 (0.759 - 0.851)</b> | <b>7.9x10<sup>-14</sup></b>  | <b>0.795 (0.72 - 0.878)</b>  | <b>7.19x10<sup>-15</sup></b> |
| 19  | rs12980543         | 56096197  | near <i>ZNF579</i>                  | A            | G            |       |    |                        |                |                              |                              |                              |                              |
| 19  | rs11084402 (proxy) | 56093365  | near <i>ZNF579</i>                  | T            | C            | 0.206 | 13 | 0.019                  | 49.4           | 1.095 (1.048 - 1.144)        | 5.1x10 <sup>-05</sup>        | 1.101 (1.031 - 1.176)        | 2.51x10 <sup>-5</sup>        |
| 20  | rs6516091          | 6050622   | near <i>FERMT1</i>                  | A            | G            | 0.135 | 13 | 4.01x10 <sup>-05</sup> | 70.0           | 1.131 (1.074 - 1.19)         | 2.9x10 <sup>-06</sup>        | <b>1.088 (0.983 - 1.203)</b> | <b>6.58x10<sup>-10</sup></b> |
| 20  | rs58749629         | 44571317  | near <i>PCIF1 ZNF335 MMP9</i>       | A            | G            |       |    |                        |                |                              |                              |                              |                              |
| 20  | rs3827066 (proxy)  | 44586023  | near <i>PCIF1 ZNF335 MMP9</i>       | T            | C            | 0.179 | 13 | 0.552                  | 0.0            | <b>1.223 (1.168 - 1.281)</b> | <b>2.1x10<sup>-17</sup></b>  | <b>1.223 (1.168 - 1.281)</b> | <b>6.12x10<sup>-17</sup></b> |
| 21  | rs2836411          | 39819830  | <i>ERG</i>                          | T            | C            | 0.369 | 13 | 4.83x10 <sup>-02</sup> | 42.2           | <b>1.113 (1.074 - 1.154)</b> | <b>5.8x10<sup>-09</sup></b>  | <b>1.112 (1.057 - 1.17)</b>  | <b>7.07x10<sup>-9</sup></b>  |
| X   | rs5954362          | 140673423 | <i>SPANXA1</i>                      | C            | G            | 0.241 | 7  | 4.18x10 <sup>-10</sup> | 87.9           | 0.896 (0.829 - 0.967)        | 5.0x10 <sup>-03</sup>        | <b>0.857 (0.672 - 1.092)</b> | <b>3.08x10<sup>-11</sup></b> |

**Online Figure II:** Regional association plots for previously reported AAA risk loci.

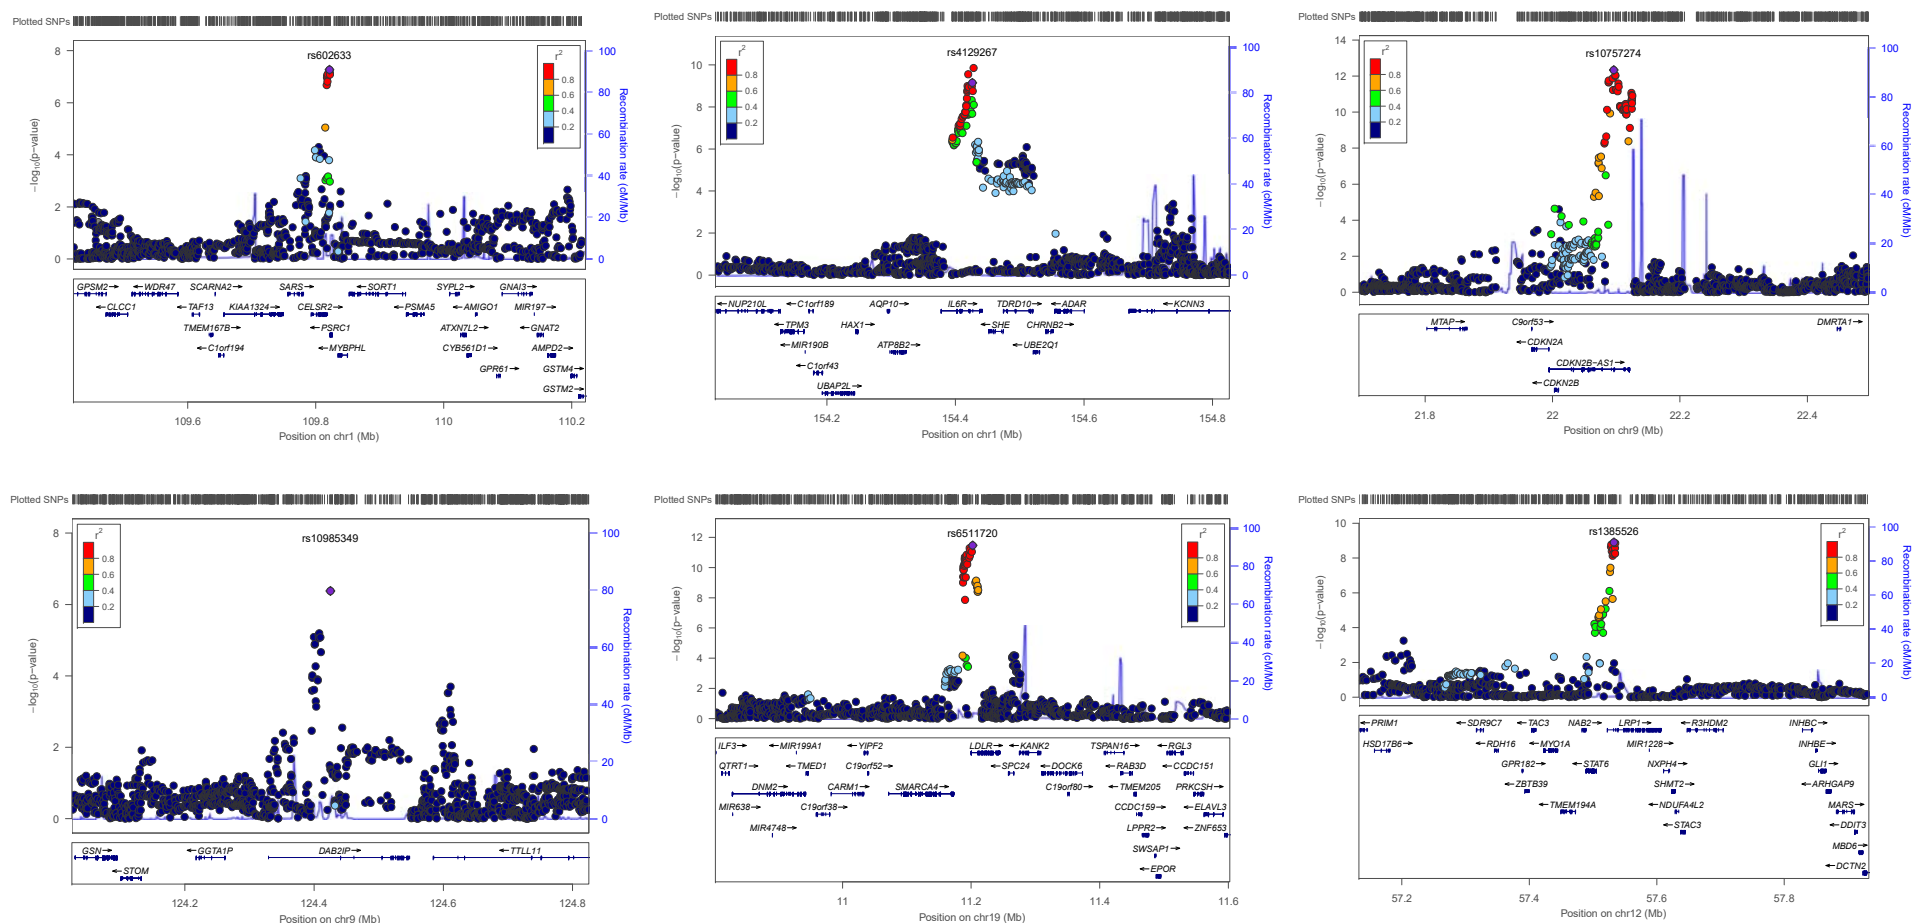

Five of the 6 previously identified AAA loci at 1p13.3 (*SORT1*), 1q21.3 (*IL6R*), 9p21 (*CDKN2BAS1/ANRIL*), 9q33 (*DAB2IP*) and 19p13.2 (*LDLR*) were replicated in this meta-GWAS and validation analysis. Although the previously reported<sup>1</sup> 12q13 (*LRP1*) locus (lower right panel) reached the discovery threshold ( $P=1.1 \times 10^{-9}$ ), it fell below the genome-wide threshold when combined with the validation cohorts (combined  $P=6.4 \times 10^{-7}$ ).

## SNP LOOKUP IN GWAS FOR OTHER TRAITS ASSOCIATED WITH AAA

Data for AAA associated SNPs (those passing the genome-wide association threshold after combination of the results of the meta-analysis and validation studies) were obtained from GWAS datasets for other traits associated with AAA to determine if the associations were unique to AAA or related to generalized CVD (**Online Table IX and Figure 3**). All results were from meta-analyses of multiple primary GWAS datasets for each trait. Summary results for each AAA associated SNP (P-value and effect size) were extracted. Results for type 2 diabetes<sup>34</sup> were obtained from the DIAGRAM consortium (<http://www.diagram-consortium.org/index.html>), CAD data from the CARDIoGRAM consortium<sup>35</sup> ([www.CARDIOGRAMPLUSC4D.ORG](http://www.CARDIOGRAMPLUSC4D.ORG)), lipid trait data from the Global Lipids Genetics Consortium<sup>36</sup> (<http://csg.sph.umich.edu/abecasis/public/lipids2013>) and blood pressure data from the International Consortium for Blood Pressure<sup>37</sup> ([http://www.ncbi.nlm.nih.gov/projects/gap/cgi-bin/study.cgi?study\\_id=phs000585.v1.p1](http://www.ncbi.nlm.nih.gov/projects/gap/cgi-bin/study.cgi?study_id=phs000585.v1.p1)).



## SEARCH FOR OTHER ASSOCIATED TRAITS AND DISEASES USING GWAS DATABASES

The Phenotype-Genotype Integrator<sup>38</sup> (<http://www.ncbi.nlm.nih.gov/gap/phegeni#GenomeView>) and the GWAS catalog (<http://www.gwascentral.org/index>) were searched for diseases and traits associated with the lead SNPs at the AAA loci. In addition, we searched NHLBI GRASP catalog (GRASP v2.0; <http://grasp.nhlbi.nih.gov/Overview.aspx>)<sup>39, 40</sup> to find any further associations. The results obtained using the Phenotype-Genotype Integrator are shown in **Online Table X**, the search results from the GWAS catalog are presented in **Online Table XI**, and those using GRASP in **Online Table XII**.

PheGenI includes results from the NHGRI/EBI catalog. GRASP (Genome-Wide Repository of Associations Between SNPs and Phenotypes) is the largest GWAS results database in terms of coverage. It includes all available genetic association results from papers, their supplements and web-based content meeting the following guidelines:

- All associations with  $P < 0.05$  from GWAS defined as  $\geq 25,000$  markers tested for 1 or more traits.
- Study exclusion criteria: CNV-only studies, replication/follow-up studies testing  $< 25K$  markers, non-human only studies, article not in English, gene-environment or gene-gene GWAS where single SNP main effects are not given, linkage only studies, aCGH/LOH only studies, heterozygosity/homozygosity (genome-wide or long run) studies, studies only presenting gene-based or pathway-based results, simulation-only studies, studies which we judge as redundant with prior studies since they do not provide significant inclusion of new samples or exposure of new results (e.g., many methodological papers on the WTCCC and FHS GWAS).

**Online Table X:** Results from the GWAS database search using the tool called Phenotype-Genotype Integrator (<http://www.ncbi.nlm.nih.gov/gap/phegeni#GenomeView>). All lead SNPs at the AAA loci were used for the search, but only two of the SNPs (rs4129267 and rs6511720) had hits.

| Chr | Location  | SNP       | Gene | Trait                                         | Location in gene | P-Value                 | Source | PubMed ID |
|-----|-----------|-----------|------|-----------------------------------------------|------------------|-------------------------|--------|-----------|
| 1   | 154426264 | rs4129267 | IL6R | Receptors, Interleukin-6                      | intron           | $2.00 \times 10^{-57}$  | NHGRI  | 18464913  |
|     |           |           |      | C-Reactive Protein                            | intron           | $2.00 \times 10^{-48}$  | NHGRI  | 21300955  |
|     |           |           |      | Asthma                                        | intron           | $2.00 \times 10^{-08}$  | NHGRI  | 21907864  |
|     |           |           |      | Maximal Midexpiratory Flow Rate               | intron           | $7.00 \times 10^{-06}$  | NHGRI  | 17903307  |
| 19  | 11202306  | rs6511720 | LDLR | Cholesterol, LDL                              | intron           | $4.00 \times 10^{-117}$ | NHGRI  | 20686565  |
|     |           |           |      | Cholesterol                                   | intron           | $7.00 \times 10^{-97}$  | NHGRI  | 20686565  |
|     |           |           |      | Cholesterol, LDL                              | intron           | $2.00 \times 10^{-51}$  | NHGRI  | 18193044  |
|     |           |           |      | Cholesterol, LDL                              | intron           | $2.00 \times 10^{-26}$  | NHGRI  | 19060906  |
|     |           |           |      | Cholesterol, LDL                              | intron           | $4.00 \times 10^{-26}$  | NHGRI  | 18193043  |
|     |           |           |      | 1-Alkyl-2-acetylglucosphosphocholine Esterase | intron           | $3.00 \times 10^{-11}$  | NHGRI  | 22003152  |
|     |           |           |      | Cholesterol, LDL                              | intron           | $5.00 \times 10^{-11}$  | NHGRI  | 21943158  |
|     |           |           |      | Atherosclerosis                               | intron           | $1.00 \times 10^{-07}$  | NHGRI  | 21909108  |

**Online Table XI:** Results of the dbGAP SNP lookup using the GWAS Catalog available at <http://www.gwascentral.org/index>. The total number of results in the GWAS Catalog (“n results in dbGAP”) and the number of associations with  $P < 1 \times 10^{-3}$  (column labelled “n  $P < 1 \times 10^{-3}$ ”) are shown. Details on the associations with  $P < 1 \times 10^{-3}$  for each SNP are described.

| SNP        | Chromosome | Position  | Gene(s)            | n results in dbGAP | n $P < 1 \times 10^{-3}$ | P-value                | Phenotype                                                                           | Study                                                                          |
|------------|------------|-----------|--------------------|--------------------|--------------------------|------------------------|-------------------------------------------------------------------------------------|--------------------------------------------------------------------------------|
| rs602633   | 1          | 109821511 | PSRC1-CELSR2-SORT1 | 16                 | 3                        | $4.80 \times 10^{-14}$ | LDL cholesterol levels                                                              | Meta-analysis of plasma lipid concentrations (HGVST214)                        |
|            |            |           |                    |                    |                          | $5.70 \times 10^{-14}$ | Serum LDL cholesterol levels                                                        | GWAS of LDL-cholesterol concentrations (HGVST227)                              |
|            |            |           |                    |                    |                          | 0.0001862              | Height                                                                              | GWAS of height (HGVST634)                                                      |
| rs4129267  | 1          | 154426264 | IL6R               | 77                 | 6                        | $2.00 \times 10^{-37}$ | Protein quantitative trait loci                                                     | GWAS of protein quantitative trait loci (HGVST264)                             |
|            |            |           |                    |                    |                          | $2.00 \times 10^{-48}$ | C-reactive protein level                                                            | GWAS of C-reactive protein levels (HGVST728)                                   |
|            |            |           |                    |                    |                          | $2.00 \times 10^{-58}$ | Asthma                                                                              | Unspecified analysis (HGVRS1753)                                               |
|            |            |           |                    |                    |                          | $7.39 \times 10^{-55}$ | Percent predicted forced expiratory flow                                            | GWAS of pulmonary function phenotypes in the Framingham Heart Study (HGVST212) |
|            |            |           |                    |                    |                          | $1.92 \times 10^{-55}$ | Asthma; Total asthma sample fixed effects (HGVRS1509)                               | GWAS of asthma (HGVST631)                                                      |
|            |            |           |                    |                    |                          | 0.00014411             | Asthma; Total asthma sample random effects (HGVRS1257)                              | GWAS of asthma (HGVST631)                                                      |
| rs1795061  | 1          | 214409280 | SMYD2              | 19                 | 0                        |                        |                                                                                     |                                                                                |
| rs10757274 | 9          | 22096055  | ANRIL              | 6                  | 2                        | $8.00 \times 10^{-45}$ | Coronary heart disease                                                              | GWAS of Coronary heart disease (HGVST1380)                                     |
|            |            |           |                    |                    |                          | $3.70 \times 10^{-55}$ | Coronary heart disease                                                              | GWAS of Coronary heart disease (HGVST57)                                       |
| rs10985349 | 9          | 124425243 | DAB2IP             | 19                 | 0                        |                        |                                                                                     |                                                                                |
| rs9316871  | 13         | 22861921  | LINC00540          | 101                | 2                        | 0.0007248              | Schizophrenia                                                                       | GWAS of schizophrenia (HGVST903)                                               |
|            |            |           |                    |                    |                          | 0.00084                | Crohn's disease                                                                     | GWAS of Crohn's disease (HGVST680)                                             |
| rs6511720  | 19         | 11202306  | LDLR               | 57                 | 14                       | $2 \times 10^{-51}$    | LDL cholesterol                                                                     | Meta-analysis of lipid concentrations (HGVST203)                               |
|            |            |           |                    |                    |                          | $4.2 \times 10^{-26}$  | LDL cholesterol levels                                                              | Meta-analysis of plasma lipid concentrations (HGVST214)                        |
|            |            |           |                    |                    |                          | $2 \times 10^{-25}$    | LDL cholesterol                                                                     | GWAS of HDL cholesterol, triglycerides and LDL cholesterol (HGVST235)          |
|            |            |           |                    |                    |                          | 0.00026672             | Serum cholesterol                                                                   | GWAS of serum cholesterol levels in a British population (HGVST312)            |
|            |            |           |                    |                    |                          | 0.0005127              | Height                                                                              | GWAS of height (HGVST634)                                                      |
|            |            |           |                    |                    |                          | 0.0000001              | Carotid intima media thickness, plaque                                              | GWAS of carotid intima media thickness (HGVST923)                              |
|            |            |           |                    |                    |                          | $3 \times 10^{-11}$    | Lipoprotein-associated phospholipase A2 activity and mass (Activity concentrations) | GWAS of lipoprotein-associated phospholipase A2 activity and mass (HGVST931)   |
|            |            |           |                    |                    |                          | $5 \times 10^{-11}$    | Cardiovascular disease risk factors (LDL)                                           | GWAS of cardiovascular disease risk factors (HGVST956)                         |
|            |            |           |                    |                    |                          | 0.000000004            | Metabolite levels                                                                   | GWAS of Metabolite levels (HGVST1409)                                          |
|            |            |           |                    |                    |                          | $2 \times 10^{-31}$    | Lipid metabolism phenotypes (LDL-C.assay, whole)                                    | GWAS of Lipid metabolism phenotypes (HGVST1667)                                |
|            |            |           |                    |                    |                          | $3 \times 10^{-18}$    | Lipid metabolism phenotypes (APOB.assay, fasting)                                   | GWAS of Lipid metabolism phenotypes (HGVST1667)                                |
|            |            |           |                    |                    |                          | $1 \times 10^{-25}$    | Lipid metabolism phenotypes (LDL-C.assay, fasting)                                  | GWAS of Lipid metabolism phenotypes (HGVST1667)                                |
|            |            |           |                    |                    |                          | $5 \times 10^{-25}$    | Lipid metabolism phenotypes (APOB.assay, whole)                                     | GWAS of Lipid metabolism phenotypes (HGVST1667)                                |
| rs3827066  | 20         | 44586023  | PCIF1-ZNF335-MMP9  | 15                 | 0                        |                        |                                                                                     |                                                                                |
| rs2836411  | 21         | 39819830  | ERG                | 94                 | 1                        | 0.0009289              | Height                                                                              | GWAS of height (HGVST634)                                                      |

**Online Table XII:** Previously reported associations of the lead SNPs from AAA loci identified from an analysis of GRASP v2.0 (<http://grasp.nhlbi.nih.gov/Overview.aspx>). The Phenotypes, P values and sample sizes are those reported in the original publication that is referenced under ‘Phenotype’ in the table. The SNP, chromosome, position and genes are those from this analysis that were entered into GRASP v2.0 as a query. This table spans 3 pages.

| SNP        | CHR | Position  | Gene                      | Phenotype                                                                   | P value                | Ancestry    | Total  | Total Replication | Total  |
|------------|-----|-----------|---------------------------|-----------------------------------------------------------------------------|------------------------|-------------|--------|-------------------|--------|
| rs602633   | 1   | 109821511 | <i>PSRC1-CELSR2-SORT1</i> | LDL cholesterol <sup>41</sup>                                               | 4.80x10 <sup>-14</sup> | European    | 8656   | 11399             | 20055  |
|            |     |           |                           | LDL cholesterol in serum <sup>42</sup>                                      | 5.70x10 <sup>-14</sup> | European    | 11685  | 5036              | 16721  |
|            |     |           |                           | LDL cholesterol <sup>43</sup>                                               | 7.60x10 <sup>-41</sup> | European    | 19840  | 20623             | 40463  |
|            |     |           |                           | LDL cholesterol <sup>44</sup>                                               | 3.10x10 <sup>-08</sup> | European    | 5059   | 0                 | 5059   |
|            |     |           |                           | APOB (apolipoprotein B) <sup>44</sup>                                       | 2.20x10 <sup>-07</sup> | European    | 5059   | 0                 | 5059   |
|            |     |           |                           | Coronary artery disease (CAD) <sup>45</sup>                                 | 9.00x10 <sup>-08</sup> | Unspecified | 8319   | 10707             | 19026  |
|            |     |           |                           | LDL cholesterol change with statins <sup>46</sup>                           | 8.40x10 <sup>-08</sup> | European    | 3928   | 0                 | 3928   |
|            |     |           |                           | LDL cholesterol <sup>46</sup>                                               | 8.40x10 <sup>-08</sup> | European    | 3928   | 0                 | 3928   |
|            |     |           |                           | Total cholesterol change with statins <sup>46</sup>                         | 5.50x10 <sup>-06</sup> | European    | 3928   | 0                 | 3928   |
|            |     |           |                           | Total cholesterol <sup>46</sup>                                             | 5.50x10 <sup>-06</sup> | European    | 3928   | 0                 | 3928   |
|            |     |           |                           | LDL cholesterol <sup>47</sup>                                               | 4.90x10 <sup>-16</sup> | Mixed       | 100184 | 39875             | 140059 |
|            |     |           |                           | Total cholesterol <sup>47</sup>                                             | 3.90x10 <sup>-12</sup> | Mixed       | 100184 | 39875             | 140059 |
|            |     |           |                           | HDL cholesterol <sup>47</sup>                                               | 5.20x10 <sup>-07</sup> | Mixed       | 100184 | 39875             | 140059 |
|            |     |           |                           | Height <sup>48</sup>                                                        | 1.90x10 <sup>-04</sup> | European    | 133653 | 50074             | 183727 |
|            |     |           |                           | LDL cholesterol <sup>49</sup>                                               | 2.90x10 <sup>-06</sup> | African     | 8090   | 8849              | 16939  |
|            |     |           |                           | LDL cholesterol <sup>50</sup>                                               | 1.20x10 <sup>-22</sup> | European    | 11683  | 0                 | 11683  |
|            |     |           |                           | LDL cholesterol (baseline) <sup>51</sup>                                    | 5.00x10 <sup>-08</sup> | European    | 5244   | 0                 | 5244   |
|            |     |           |                           | Lp-PLA2 activity <sup>52</sup>                                              | 1.40x10 <sup>-16</sup> | European    | 13664  | 0                 | 13664  |
|            |     |           |                           | Total cholesterol <sup>53</sup>                                             | 5.90x10 <sup>-65</sup> | European    | 66240  | 25282             | 91522  |
|            |     |           |                           | LDL cholesterol <sup>53</sup>                                               | 6.90x10 <sup>-65</sup> | European    | 66240  | 25282             | 91522  |
|            |     |           |                           | HDL cholesterol <sup>53</sup>                                               | 1.30x10 <sup>-07</sup> | European    | 66240  | 25282             | 91522  |
|            |     |           |                           | Coronary artery disease (CAD) <sup>54</sup>                                 | 4.70x10 <sup>-26</sup> | Mixed       | 194427 | 15613             | 210040 |
|            |     |           |                           | Coronary artery disease (CAD) age <=50 <sup>54</sup>                        | 2.80x10 <sup>-20</sup> | Mixed       | 194427 | 15613             | 210040 |
|            |     |           |                           | Coronary artery disease (CAD) (males) <sup>54</sup>                         | 1.30x10 <sup>-18</sup> | Mixed       | 194427 | 15613             | 210040 |
|            |     |           |                           | Coronary artery disease (CAD) with myocardial infarction (MI) <sup>54</sup> | 2.20x10 <sup>-16</sup> | Mixed       | 194427 | 15613             | 210040 |
|            |     |           |                           | Coronary artery disease (CAD) age >50 <sup>54</sup>                         | 5.00x10 <sup>-08</sup> | Mixed       | 194427 | 15613             | 210040 |
|            |     |           |                           | Coronary artery disease (CAD) (females) <sup>54</sup>                       | 3.40x10 <sup>-05</sup> | Mixed       | 194427 | 15613             | 210040 |
| rs4129267  | 1   | 154426264 | <i>IL6R</i>               | Lung function, predicted forced expiratory flow (FEF) <sup>55</sup>         | 7.40x10 <sup>-06</sup> | European    | 1222   | 0                 | 1222   |
|            |     |           |                           | Plasma C-reactive protein (female) <sup>56</sup>                            | 2.00x10 <sup>-08</sup> | European    | 6345   | 0                 | 6345   |
|            |     |           |                           | Soluble IL6R (sIL6R) <sup>57</sup>                                          | 2.50x10 <sup>-76</sup> | European    | 1200   | 0                 | 1200   |
|            |     |           |                           | C-reactive protein [log (mg/l)] <sup>58</sup>                               | 4.40x10 <sup>-04</sup> | European    | 4763   | 0                 | 4763   |
|            |     |           |                           | Plasma fibrinogen (females) <sup>59</sup>                                   | 1.80x10 <sup>-11</sup> | European    | 17686  | 0                 | 17686  |
|            |     |           |                           | Asthma <sup>60</sup>                                                        | 1.90x10 <sup>-05</sup> | European    | 26475  | 0                 | 26475  |
|            |     |           |                           | Fibrinogen <sup>61</sup>                                                    | 8.40x10 <sup>-07</sup> | Mixed       | 30291  | 0                 | 30291  |
|            |     |           |                           | C-reactive protein (CRP) <sup>62</sup>                                      | 2.10x10 <sup>-48</sup> | European    | 66185  | 16540             | 82725  |
|            |     |           |                           | Asthma <sup>60</sup>                                                        | 2.40x10 <sup>-08</sup> | European    | 7197   | 57800             | 64997  |
|            |     |           |                           | Interleukin-6 (IL-6) levels <sup>63</sup>                                   | 2.40x10 <sup>-08</sup> | European    | 4694   | 1392              | 6086   |
|            |     |           |                           | C-reactive protein (CRP) <sup>64</sup>                                      | 1.80x10 <sup>-05</sup> | Mixed       | 11828  | 11991             | 23819  |
|            |     |           |                           | Coronary artery disease (CAD) <sup>54</sup>                                 | 1.70x10 <sup>-08</sup> | Mixed       | 194427 | 15613             | 210040 |
|            |     |           |                           | Interleukin-6 (IL-6) levels <sup>65</sup>                                   | 1.60x10 <sup>-21</sup> | European    | 8356   | 0                 | 8356   |
|            |     |           |                           | C-reactive protein (CRP) <sup>65</sup>                                      | 8.80x10 <sup>-12</sup> | European    | 8356   | 0                 | 8356   |
| rs1795061  | 1   | 214409280 | <i>SMYD2</i>              | None                                                                        |                        |             |        |                   |        |
| rs10757274 | 9   | 22096055  | <i>ANRIL</i>              | Coronary heart disease (CHD) <sup>66</sup>                                  | 3.70x10 <sup>-06</sup> | Mixed       | 634    | 28047             | 28681  |
|            |     |           |                           | Coronary artery disease (CAD) <sup>45</sup>                                 | 7.00x10 <sup>-11</sup> | Unspecified | 8319   | 10707             | 19026  |
|            |     |           |                           | Coronary artery disease (CAD) <sup>67</sup>                                 | 7.60x10 <sup>-45</sup> | Asian       | 6534   | 26932             | 33466  |
|            |     |           |                           | Coronary artery calcification (CAC) <sup>68</sup>                           | 8.00x10 <sup>-10</sup> | European    | 4518   | 0                 | 4518   |

| SNP        | CHR | Position  | Gene      | Phenotype                                                                                 | P value                | Ancestry             | Total  | Total Replication | Total  |
|------------|-----|-----------|-----------|-------------------------------------------------------------------------------------------|------------------------|----------------------|--------|-------------------|--------|
|            |     |           |           | Coronary artery calcification (CAC) <sup>69</sup>                                         | 6.80x10 <sup>-68</sup> | Mixed                | 1509   | 3344              | 4853   |
| rs10985349 | 9   | 124425243 | DAB2IP    | None                                                                                      |                        |                      |        |                   |        |
| rs9316871  | 13  | 22861921  | LINC00540 | Body mass index (BMI) <sup>70</sup>                                                       | 6.90x10 <sup>-04</sup> | European             | 5217   | 0                 | 5217   |
|            |     |           |           | Schizophrenia <sup>71</sup>                                                               | 9.40x10 <sup>-05</sup> | European             | 16161  | 31375             | 47536  |
|            |     |           |           | HDL cholesterol change with statins <sup>46</sup>                                         | 7.70x10 <sup>-04</sup> | European             | 3928   | 0                 | 3928   |
| rs6511720  | 19  | 11202306  | LDLR      | LDL cholesterol <sup>41</sup>                                                             | 4.20x10 <sup>-26</sup> | European             | 8656   | 11399             | 20055  |
|            |     |           |           | LDL cholesterol <sup>72</sup>                                                             | 2.00x10 <sup>-51</sup> | Mixed                | 2758   | 22803             | 25561  |
|            |     |           |           | LDL cholesterol <sup>43</sup>                                                             | 5.20x10 <sup>-30</sup> | European             | 19840  | 20623             | 40463  |
|            |     |           |           | LDL cholesterol exam 1 values <sup>43</sup>                                               | 3.00x10 <sup>-04</sup> | European             | 19840  | 20623             | 40463  |
|            |     |           |           | Total cholesterol (exam 1) <sup>43</sup>                                                  | 3.40x10 <sup>-04</sup> | European             | 19840  | 20623             | 40463  |
|            |     |           |           | LDL cholesterol (mmol/l) <sup>38</sup>                                                    | 1.50x10 <sup>-09</sup> | European             | 4763   | 0                 | 4763   |
|            |     |           |           | Total cholesterol <sup>73</sup>                                                           | 6.80x10 <sup>-18</sup> | European             | 22562  | 0                 | 22562  |
|            |     |           |           | APOB (apolipoprotein B) <sup>74</sup>                                                     | 7.00x10 <sup>-18</sup> | European             | 6382   | 970               | 7352   |
|            |     |           |           | LDL cholesterol <sup>74</sup>                                                             | 5.20x10 <sup>-15</sup> | European             | 6382   | 970               | 7352   |
|            |     |           |           | LDL cholesterol <sup>44</sup>                                                             | 7.30x10 <sup>-24</sup> | European             | 5059   | 0                 | 5059   |
|            |     |           |           | APOB (apolipoprotein B) <sup>44</sup>                                                     | 6.80x10 <sup>-15</sup> | European             | 5059   | 0                 | 5059   |
|            |     |           |           | LDL cholesterol lipoprotein fraction concentration <sup>75</sup>                          | 2.30x10 <sup>-31</sup> | European/Unspecified | 17296  | 9472              | 26768  |
|            |     |           |           | LDL cholesterol lipoprotein fraction concentration in fasting sample <sup>75</sup>        | 1.50x10 <sup>-25</sup> | European/Unspecified | 17296  | 9472              | 26768  |
|            |     |           |           | APOB assay lipoprotein fraction concentration <sup>75</sup>                               | 4.80x10 <sup>-25</sup> | European/Unspecified | 17296  | 9472              | 26768  |
|            |     |           |           | APOB assay lipoprotein fraction concentration in fasting sample <sup>75</sup>             | 2.80x10 <sup>-18</sup> | European/Unspecified | 17296  | 9472              | 26768  |
|            |     |           |           | LDL cholesterol large lipoprotein fraction concentration <sup>75</sup>                    | 4.30x10 <sup>-15</sup> | European/Unspecified | 17296  | 9472              | 26768  |
|            |     |           |           | LDL cholesterol total lipoprotein fraction concentration <sup>75</sup>                    | 1.90x10 <sup>-13</sup> | European/Unspecified | 17296  | 9472              | 26768  |
|            |     |           |           | LDL cholesterol large lipoprotein fraction concentration in fasting sample <sup>75</sup>  | 3.00x10 <sup>-12</sup> | European/Unspecified | 17296  | 9472              | 26768  |
|            |     |           |           | VLDL cholesterol small lipoprotein fraction concentration <sup>75</sup>                   | 1.60x10 <sup>-10</sup> | European/Unspecified | 17296  | 9472              | 26768  |
|            |     |           |           | LDL cholesterol total lipoprotein fraction concentration in fasting sample <sup>75</sup>  | 2.10x10 <sup>-09</sup> | European/Unspecified | 17296  | 9472              | 26768  |
|            |     |           |           | VLDL cholesterol small lipoprotein fraction concentration in fasting sample <sup>75</sup> | 1.90x10 <sup>-08</sup> | European/Unspecified | 17296  | 9472              | 26768  |
|            |     |           |           | LDL cholesterol change with statins <sup>46</sup>                                         | 2.80x10 <sup>-05</sup> | European             | 3928   | 0                 | 3928   |
|            |     |           |           | LDL cholesterol <sup>46</sup>                                                             | 2.80x10 <sup>-05</sup> | European             | 3928   | 0                 | 3928   |
|            |     |           |           | LDL cholesterol <sup>47</sup>                                                             | 8.60x10 <sup>-12</sup> | Mixed                | 100184 | 39875             | 140059 |
|            |     |           |           | Total cholesterol <sup>47</sup>                                                           | 1.70x10 <sup>-10</sup> | Mixed                | 100184 | 39875             | 140059 |
|            |     |           |           | Coronary artery disease (CAD) <sup>47</sup>                                               | 5.00x10 <sup>-09</sup> | Mixed                | 100184 | 39875             | 140059 |
|            |     |           |           | Height <sup>48</sup>                                                                      | 5.10x10 <sup>-04</sup> | European             | 133653 | 50074             | 183727 |
|            |     |           |           | LDL cholesterol <sup>49</sup>                                                             | 2.00x10 <sup>-51</sup> | African              | 8090   | 8849              | 16939  |
|            |     |           |           | Presence of carotid artery plaque <sup>76</sup>                                           | 8.20x10 <sup>-08</sup> | European             | 31211  | 11273             | 42484  |
|            |     |           |           | Carotid artery plaque <sup>76</sup>                                                       | 1.00x10 <sup>-07</sup> | European             | 31211  | 11273             | 42484  |
|            |     |           |           | Coronary artery disease (CAD) <sup>76</sup>                                               | 2.00x10 <sup>-04</sup> | European             | 31211  | 11273             | 42484  |
|            |     |           |           | LDL cholesterol <sup>50</sup>                                                             | 5.00x10 <sup>-11</sup> | European             | 11683  | 0                 | 11683  |
|            |     |           |           | Coronary artery disease (CAD) <sup>77</sup>                                               | 1.10x10 <sup>-08</sup> | Mixed                | 50587  | 57594             | 108181 |
|            |     |           |           | LDL cholesterol (baseline) <sup>51</sup>                                                  | 5.20x10 <sup>-15</sup> | European             | 5244   | 0                 | 5244   |
|            |     |           |           | Lp-PLA2 activity <sup>52</sup>                                                            | 2.60x10 <sup>-11</sup> | European             | 13664  | 0                 | 13664  |
|            |     |           |           | Lp-PLA2 mass <sup>52</sup>                                                                | 5.50x10 <sup>-05</sup> | European             | 13664  | 0                 | 13664  |
|            |     |           |           | Metabolic syndrome domains (Atherogenic Dyslipidemia - PC1) <sup>78</sup>                 | 5.20x10 <sup>-30</sup> | Mixed                | 25755  | 0                 | 25755  |
|            |     |           |           | Metabolic syndrome domains (Multivariate analysis) <sup>78</sup>                          | 8.30x10 <sup>-28</sup> | Mixed                | 25755  | 0                 | 25755  |
|            |     |           |           | LDL cholesterol <sup>79</sup>                                                             | 1.40x10 <sup>-49</sup> | Mixed                | 44957  | 0                 | 44957  |
|            |     |           |           | LDL cholesterol (female) <sup>79</sup>                                                    | 7.50x10 <sup>-29</sup> | Mixed                | 44957  | 0                 | 44957  |
|            |     |           |           | LDL cholesterol (male) <sup>79</sup>                                                      | 3.10x10 <sup>-25</sup> | Mixed                | 44957  | 0                 | 44957  |
|            |     |           |           | LDL cholesterol <sup>53</sup>                                                             | 1.30x10 <sup>-79</sup> | European             | 66240  | 25282             | 91522  |
|            |     |           |           | Total cholesterol <sup>53</sup>                                                           | 1.70x10 <sup>-71</sup> | European             | 66240  | 25282             | 91522  |
|            |     |           |           | APOB (apolipoprotein B) <sup>80</sup>                                                     | 4.10x10 <sup>-27</sup> | European             | 3895   | 14810             | 18705  |
|            |     |           |           | LDL cholesterol <sup>80</sup>                                                             | 3.80x10 <sup>-25</sup> | European             | 3895   | 14810             | 18705  |
|            |     |           |           | APOB (apolipoprotein B) response after 40mg daily simvastatin treatment <sup>80</sup>     | 1.40x10 <sup>-07</sup> | European             | 3895   | 14810             | 18705  |
|            |     |           |           | LDL cholesterol response after 40mg daily simvastatin treatment <sup>80</sup>             | 4.30x10 <sup>-07</sup> | European             | 3895   | 14810             | 18705  |
|            |     |           |           | LDL cholesterol <sup>81</sup>                                                             | 2.60x10 <sup>-17</sup> | Mixed                | 9813   | 7000              | 16813  |
|            |     |           |           | Total cholesterol <sup>81</sup>                                                           | 1.80x10 <sup>-16</sup> | Mixed                | 9813   | 7000              | 16813  |

| SNP       | CHR | Position | Gene              | Phenotype                                   | P value                | Ancestry | Total  | Total Replication | Total  |
|-----------|-----|----------|-------------------|---------------------------------------------|------------------------|----------|--------|-------------------|--------|
|           |     |          |                   | Total cholesterol <sup>52</sup>             | 4.40x10 <sup>-68</sup> | Hispanic | 2240   | 2121              | 4361   |
| rs3827066 | 20  | 44586023 | PCIF1-ZNF335-MMP9 | Coronary artery disease (CAD) <sup>54</sup> | 1.40x10 <sup>-65</sup> | Mixed    | 194427 | 15613             | 210040 |
| rs2836411 | 21  | 39819830 | ERG               | None                                        |                        |          |        |                   |        |

## PheWAS ANALYSIS

We performed a phenome-wide association study (PheWAS)<sup>83, 84</sup> exploring the association between the 9 AAA-associated SNPs and an extensive group of diagnoses to identify novel associations and uncover potential pleiotropy. For the PheWAS we used data from the electronic Medical Records and Genomics (eMERGE) Network<sup>23</sup> derived from 7 adult sites with a total of 27,077 unrelated patients of European ancestry above 19 years of age. We divided these samples into two datasets by proportional sampling based on eMERGE site, sex, and genotyping platform (13,559 and 13,518 individuals in sets 1 and 2, respectively). We calculated associations between the 9 AAA-associated SNPs and case or control status based on the extensive set of ICD-9 diagnoses, where for a specific diagnosis, individuals with the diagnosis are considered cases. Associations were adjusted for sex, site, genotyping platform and the first 3 principal components to account for global ancestry. We considered the identification of previously known associations, such as rs602633 associated with hyperglyceridemia and rs10757274 associated with CAD, to be indications that the PheWAS approach was robust. The PheWAS results are presented in **Online Table XIII**.

**Online Table XIII: PheWAS Results**

| Chr | Position  | SNP        | Locus    | Gene(s)                       | PheWAS associations | ICD-9 Description                                                       | PheWAS dataset 1 |                 |                           | PheWAS dataset 2 |                |                        |
|-----|-----------|------------|----------|-------------------------------|---------------------|-------------------------------------------------------------------------|------------------|-----------------|---------------------------|------------------|----------------|------------------------|
|     |           |            |          |                               |                     |                                                                         | n cases/controls | Beta(SE)        | P                         | n cases/controls | Beta(SE)       | P                      |
| 1   | 214409280 | rs1795061  | 1q32.3   | near <i>SMYD2</i>             | None                |                                                                         |                  |                 |                           |                  |                |                        |
| 1   | 154426264 | rs4129267  | 1q21.3   | <i>IL6R</i>                   | None                |                                                                         |                  |                 |                           |                  |                |                        |
| 1   | 109821511 | rs602633   | 1p13.3   | <i>CELSR2/SORT1</i>           | 6                   | Other and unspecified hyperlipidemia                                    | 5467/5722        | -0.187 (0.035)  | 7.86171x10 <sup>-08</sup> | 5539/5645        | -0.151 (0.035) | 1.54x10 <sup>-05</sup> |
|     |           |            |          |                               |                     | Other and unspecified hyperlipidemia                                    | 5467/5722        | -0.187 (0.0345) | 7.86171x10 <sup>-08</sup> | 2506/8687        | -0.114 (0.042) | 0.006402               |
|     |           |            |          |                               |                     | Pure hypercholesterolemia                                               | 2436/8780        | -0.116 (0.042)  | 0.0055185                 | 5539/5645        | -0.151 (0.035) | 1.54x10 <sup>-05</sup> |
|     |           |            |          |                               |                     | Pure hypercholesterolemia                                               | 2436/8780        | -0.116 (0.042)  | 0.0055185                 | 2506/8687        | -0.114 (0.042) | 0.006402               |
|     |           |            |          |                               |                     | Mixed hyperlipidemia                                                    | 1310/11032       | -0.141 (0.054)  | 0.0083104                 | 5539/5645        | -0.151 (0.035) | 1.54x10 <sup>-05</sup> |
|     |           |            |          |                               |                     | Mixed hyperlipidemia                                                    | 1310/11032       | -0.141 (0.054)  | 0.0083104                 | 2506/8687        | -0.114 (0.042) | 0.006402               |
| 9   | 22096055  | rs10757274 | 9p21     | <i>ANRIL</i>                  | 2                   | Coronary atherosclerosis of native coronary artery                      | 2332/9886        | 0.210 (0.034)   | 3.70081x10 <sup>-10</sup> | 2141/9972        | 0.158 (0.035)  | 6.9x10 <sup>-06</sup>  |
|     |           |            |          |                               |                     | Coronary atherosclerosis of unspecified type of vessel, native or graft | 2167/10004       | 0.202 (0.035)   | 4.61186x10 <sup>-09</sup> | 2141/9972        | 0.158 (0.035)  | 6.9x10 <sup>-06</sup>  |
| 9   | 124425243 | rs10985349 | 9q33.2   | <i>DAB2IP</i>                 | None                |                                                                         |                  |                 |                           |                  |                |                        |
| 13  | 22861921  | rs9316871  | 13q12.11 | <i>LINC00540</i>              | None                |                                                                         |                  |                 |                           |                  |                |                        |
| 19  | 11202306  | rs6511720  | 19p13.2  | <i>LDLR</i>                   | 4                   | Other and unspecified hyperlipidemia                                    | 5638/5878        | -0.201 (0.046)  | 1.05931x10 <sup>-05</sup> | 2583/8928        | -0.218 (0.055) | 4.95x10 <sup>-05</sup> |
|     |           |            |          |                               |                     | Other and unspecified hyperlipidemia                                    | 5638/5878        | -0.201 (0.046)  | 1.05931x10 <sup>-05</sup> | 5697/5803        | -0.173 (0.045) | 9.53x10 <sup>-05</sup> |
|     |           |            |          |                               |                     | Pure hypercholesterolemia                                               | 2502/9017        | -0.183 (0.056)  | 0.000948352               | 2583/8928        | -0.218 (0.055) | 4.95x10 <sup>-05</sup> |
|     |           |            |          |                               |                     | Pure hypercholesterolemia                                               | 2502/9017        | -0.183 (0.056)  | 0.000948352               | 5697/5803        | -0.173 (0.045) | 9.53x10 <sup>-05</sup> |
| 20  | 44586023  | rs3827066  | 20q13.12 | Near <i>PCIF1/MMP9/ZNF335</i> | None                |                                                                         |                  |                 |                           |                  |                |                        |
| 21  | 39819830  | rs2836411  | 21q22.2  | <i>ERG</i>                    | None                |                                                                         |                  |                 |                           |                  |                |                        |

## ANNOTATION OF AAA ASSOCIATED SNPs USING THE UCSC GENOME BROWSER

The 9 AAA-associated loci were manually annotated using the UCSC Genome Browser (<http://genome.ucsc.edu/cgi-bin/hgGateway>) on the hg19 human genome assembly. To annotate a gene, the SNP identification number (rs ID) was typed into the browser, and the genomic region centered on the SNP was examined. We noted genomic elements within 10 kbp of the SNP and on either side of the SNP. Within the browser, there were eleven main tracks that were used to annotate the SNP, which displayed gene locations, related literature, full-length public transcriptome data (mRNAs and ESTs), regulation, conservation, and repetitive elements. The results of this annotation are presented in **Online Table XIV**.

### *Gene Location*

We used several UCSC Genome Browser tracks to determine whether a locus was exonic, intronic, or intergenic, as well as the identity and classification of the gene, if any, at the locus. One of the tracks used was the UCSC Known Genes track. This track displays information on genes and their location, including both protein-coding and non-coding RNA genes<sup>85</sup>. Within this track, NCBI Reference Sequence (RefSeq) genes and GenBank genes were aligned to the genome (by the UCSC Genome Bioinformatics team) using the BLAST-like alignment tool (BLAT)<sup>86-88</sup>. In order to be included, genes needed a 98% alignment. The track also included gene models from the Consensus CDS (CCDS) project. Predicted genes from tRNA and mouse genes from Rfam with synteny to the human genome are also included in the track<sup>89,90</sup>. The track also reports whether the gene is coding or non-coding. In addition to using the NCBI RefSeq to search proteins, UniProt proteins are also reported<sup>91</sup>.

Another UCSC track that describes the location of coding and non-coding genes is the NCBI RefSeq track. This displays genes that were aligned to genome with at least a 96% match<sup>88</sup>. We also used ENCODE Consortium's Gencode human gene catalog (v19)<sup>92</sup>. The track combines automatic annotations with manual and experimentally validated entries. Another track used to examine gene location is the Broad Institute lincRNA track. The long intergenic non-coding RNA (lincRNA) data were collected by RNA sequencing (RNA-seq)<sup>93</sup>. In addition to lincRNAs, the track also displays transcripts of uncertain coding potential (TUCP). For each of these gene types, expression was displayed across 22 different cell and tissue types<sup>94</sup>.

### *Related Literature*

The loci were also annotated according to their relationship to other SNPs. The National Human Genome Research Institute (NHGRI) has a UCSC track of manually curated loci from published Genome-Wide Association Studies (GWAS)<sup>95</sup> with  $P < 1.0 \times 10^{-5}$ . This track was used to check independent previously reported disease or phenotype association of each SNP, and to see if the locus of interest fell within a "SNP cloud", which is an area with several SNPs all significantly associated with complementary or biologically similar quantitative traits.

### *mRNAs and ESTs*

In addition to looking at genes, mRNAs and expressed sequence tags (ESTs) were examined. One track used was the human mRNA track. This is comprised of human mRNAs from GenBank aligned to the genome using BLAT<sup>86,87</sup>. The Human ESTs track was compiled in the same manner, and included both spliced and un-spliced ESTs. Both of these tracks contain raw full-length public transcriptome data

captured through transcript-to-genome alignments and were used to confirm the presence of genes, to interrogate gene expression profiles, to derive comprehensive information on gene structures (promoters, splice junctions, 3'ends), and novel transcriptional units absent from gene databases.

### *Regulation*

There were also several UCSC Browser tracks used to examine epigenetic and post-transcriptional regulation in the vicinity of a SNP. One track is the TS miRNA track. This shows 3' untranslated region (UTR) microRNA (miRNA) binding sites predicted using TargetScanHuman version 5.1. First, the UTRs were scanned for miRNA sites<sup>96</sup>. After all the matches were found, they were ranked<sup>97</sup>. Another track that displayed regulatory information was the ENCODE Regulation supertrack, which consists of 7 sub-tracks. All of the tracks were used in annotating the locus. The first of these sub-tracks is the transcription track, which displays ENCODE RNA-seq results from cells representing 9 different tissues<sup>98</sup>.

Three of the sub-tracks show information on histone modifications. This was collected by ENCODE using chromatin immunoprecipitation sequencing (ChIP-seq) on cells representing seven different tissues<sup>99</sup>. One histone modification is the monomethylation of lysine 4 in the histone 3 protein, referred to as H3K4Me1. Another modification is the acetylation of lysine 27 in the same histone protein, referred to as H3K27Ac. The presence of either modification suggests an activating regulatory element, and the co-occurrence of the two modifications indicates a putative enhancer region. The third histone modification examined is a trimethylation of lysine 4 in the same histone protein, referred to as H3K4Me3. This signal indicates the presence of a promoter.

Another sub-track we used is the DNase hypersensitivity track version 3, which shows areas of open chromosome accessibility in 125 different cell lines<sup>100</sup>. The final two sub-tracks display transcription factor binding sites (TFBSs). Both were created using ChIP-Seq and have information for 161 different transcription factors in 91 different cell types<sup>101</sup>. The differentiating factor between the two tracks is that one includes information from Factorbook, which displays consensus motifs in binding sites<sup>102</sup>.

### *Conservation*

To examine the evolutionary conservation of a locus, the PhyloP Conservation track is used. This displays conservation across 100 different species in a human-centric multispecies alignment<sup>103</sup>.

### *Repetitive Elements*

The final track used is RepeatMaster, which searches the genome for 10 different forms of repeating elements, including long interspersed nuclear elements (LINE), short interspersed nuclear element (SINE), and retrotransposons. This track uses information from the Genetic Information Research Institute's (GIRI) Repbase Update library<sup>104</sup> and makes it possible to determine whether a SNP resides within a genomic repetitive element.

**Online Table XIV.** Annotation of AAA-Associated SNPs using the UCSC Genome Browser  
(<http://genome.ucsc.edu/cgi-bin/hgGateway>)

| SNP rs#    | Information Available in UCSC Genome Browser                                                                                                                                                                                                                                                                                                                                                                                                                                                                                                                                                                                                                                                                                                                                                                                                                                                                                                                                                                                                                      |
|------------|-------------------------------------------------------------------------------------------------------------------------------------------------------------------------------------------------------------------------------------------------------------------------------------------------------------------------------------------------------------------------------------------------------------------------------------------------------------------------------------------------------------------------------------------------------------------------------------------------------------------------------------------------------------------------------------------------------------------------------------------------------------------------------------------------------------------------------------------------------------------------------------------------------------------------------------------------------------------------------------------------------------------------------------------------------------------|
| rs1795061  | Intron of one mRNA (AY343912), but no ESTs<br>~550 bp downstream of CEBP beta binding site with consensus motif                                                                                                                                                                                                                                                                                                                                                                                                                                                                                                                                                                                                                                                                                                                                                                                                                                                                                                                                                   |
| rs4129267  | In a LINE repeat<br>NHGRI: associated with CAD, asthma, C-protein levels, and protein quantitative traits.<br>Intron of <i>IL6R</i> (involved in immune responses), H3K4Me1 expression<br>In a DNase hypersensitivity cluster (83/125) and 7 TFBSs, including one with a consensus site (MYC).<br>Low expression level.<br>Two ESTs are near the hypersensitivity site, but are not related to any gene/mRNAs.                                                                                                                                                                                                                                                                                                                                                                                                                                                                                                                                                                                                                                                    |
| rs602633   | NHGRI: associated with stroke<br>850 bp downstream of 3' end of <i>PSRC1</i> (involved in mitosis)<br>900 bp downstream of large H3K4Me1 peak; high transcription levels<br>Associated with a DNase site (9/125) and 3 TFBSs, including a consensus site in <i>EGR1</i> .<br>Approximately 1 kb upstream of a DNase hypersensitivity region (125/125, 100% of cell types) with a large H3K4Me1 peak and mild H3K27Ac levels. There are 36 TFBSs, 6 with consensus motifs.<br>3 kb downstream of <i>CELSR2</i> (brain expressed cadherin like protein). This region also has high H3K4Me1 expression and moderate H3K27Ac levels, indicating an enhancer region. There are also high transcription levels. There is a DNase hypersensitivity region (62/125) that correlates with 50 TFBSs, 18 with consensus motifs.<br>5 kbp downstream of another DNase hypersensitivity site (20/125) with 6 TFBSs, 4 of which have consensus motifs.<br>SNP cloud with 9 other SNPs, which have been associated with cholesterol and lipid levels, as well as stroke, and CAD |
| rs10757274 | NHGRI: associated with CAD<br>In a LINE and intron of <i>ANRIL</i><br>1.6 kb upstream from high H3K4Me1 and moderate H3K27Ac<br>DNase hypersensitivity site (61) and 15 TFBSs (2 consensus motifs)<br>7 kbp upstream from a putative enhancer region (high H3K4Me1 and H3K27Ac), associated with DNase hypersensitivity (88) and over 50 TFBSs                                                                                                                                                                                                                                                                                                                                                                                                                                                                                                                                                                                                                                                                                                                    |
| rs10985349 | Intron of <i>DAB2IP</i><br>In a DNase hypersensitivity cluster (22) and H3K4Me1 peak                                                                                                                                                                                                                                                                                                                                                                                                                                                                                                                                                                                                                                                                                                                                                                                                                                                                                                                                                                              |
| rs9316871  | Intergenic                                                                                                                                                                                                                                                                                                                                                                                                                                                                                                                                                                                                                                                                                                                                                                                                                                                                                                                                                                                                                                                        |
| rs6511720  | NHGRI: associated with CAD and aneurysm, as well as with lipid and cholesterol levels<br>Intronic to <i>LDLR</i><br>Moderate transcription levels<br>High levels of H3K4Me1, H3K4Me3, and H3K27Ac (indicating an enhancer/promoter region)<br>In a DNase hypersensitivity cluster of 105/125 with approximately 40 TFBSs (9 consensus motifs)                                                                                                                                                                                                                                                                                                                                                                                                                                                                                                                                                                                                                                                                                                                     |
| rs3827066  | Intron of <i>ZNF335</i><br>Moderate transcription levels                                                                                                                                                                                                                                                                                                                                                                                                                                                                                                                                                                                                                                                                                                                                                                                                                                                                                                                                                                                                          |
| rs2836411  | Intron of <i>ERG</i><br>High H3K4Me1 levels, mild H3K27Ac levels<br>Inside a DNase hypersensitivity cluster (11)                                                                                                                                                                                                                                                                                                                                                                                                                                                                                                                                                                                                                                                                                                                                                                                                                                                                                                                                                  |

## PUPASUITE ANALYSIS

The lead SNPs at the 4 novel AAA risk loci (**Table 1**) were identified in the 1000 Genomes phase 3 CEU panel. SNPs in LD ( $r^2 > 0.5$ ) and the lead SNPs were extracted from the 1000 Genomes data and entered into Pupasuite v3.1<sup>105</sup> (**Online Table XV**). No non-synonymous, transcript structure, transcript processing, transcription factor (TF) binding site (Transfac/Jaspar/Oreganno), miRNA sequence, miRNA target, splice site or other functional results were identified.

**Online Table XV:** Pupasuite 3.1 output for SNPs in LD ( $r^2 > 0.5$ ) with lead SNPs at novel AAA loci.

\*Transcript IDs are shown without the full Ensembl Transcript ID (ENST number) for display purposes.

This table spans 2 pages.

| Lead SNP  | Chr | Position  | Nearest gene(s)                   | LD SNPs     | $r^2$ | Location relative to transcript | Gene   | Transcript(s)*                                                                                                                 |
|-----------|-----|-----------|-----------------------------------|-------------|-------|---------------------------------|--------|--------------------------------------------------------------------------------------------------------------------------------|
| rs1795061 | 1   | 214409280 | <a href="#">SMYD2</a>             | rs1795065   | 1     | INTERGENIC                      |        |                                                                                                                                |
|           |     |           |                                   | rs1660364   | 1     | INTERGENIC                      |        |                                                                                                                                |
|           |     |           |                                   | rs1660365   | 1     | INTERGENIC                      |        |                                                                                                                                |
|           |     |           |                                   | rs1795064   | 1     | INTERGENIC                      |        |                                                                                                                                |
|           |     |           |                                   | rs1795063   | 1     | INTERGENIC                      |        |                                                                                                                                |
|           |     |           |                                   | rs1795062   | 1     | INTERGENIC                      |        |                                                                                                                                |
|           |     |           |                                   | rs1660368   | 1     | INTERGENIC                      |        |                                                                                                                                |
|           |     |           |                                   | rs199679227 | 1     | INTERGENIC                      |        |                                                                                                                                |
|           |     |           |                                   | rs1660371   | 1     | INTERGENIC                      |        |                                                                                                                                |
|           |     |           |                                   | rs1795060   | 1     | INTERGENIC                      |        |                                                                                                                                |
|           |     |           |                                   | rs201675223 | 0.978 | INTERGENIC                      |        |                                                                                                                                |
|           |     |           |                                   | rs1147673   | 0.912 | INTERGENIC                      |        |                                                                                                                                |
|           |     |           |                                   | rs12745411  | 0.724 | INTERGENIC                      |        |                                                                                                                                |
|           |     |           |                                   | rs11585945  | 0.724 | INTERGENIC                      |        |                                                                                                                                |
|           |     |           |                                   | rs61819142  | 0.724 | INTERGENIC                      |        |                                                                                                                                |
|           |     |           |                                   | rs12754343  | 0.724 | INTERGENIC                      |        |                                                                                                                                |
|           |     |           |                                   | rs17784245  | 0.628 | INTERGENIC                      |        |                                                                                                                                |
|           |     |           |                                   | rs1021639   | 0.609 | INTERGENIC                      |        |                                                                                                                                |
| rs9316871 | 13  | 22861921  | <a href="#">LINC00540</a>         | rs9506822   | 0.85  | INTERGENIC                      |        |                                                                                                                                |
|           |     |           |                                   | rs9510086   | 0.763 | INTERGENIC                      |        |                                                                                                                                |
|           |     |           |                                   | rs12863716  | 0.763 | INTERGENIC                      |        |                                                                                                                                |
|           |     |           |                                   | rs7336555   | 0.763 | INTERGENIC                      |        |                                                                                                                                |
|           |     |           |                                   | rs12857403  | 0.763 | INTERGENIC                      |        |                                                                                                                                |
|           |     |           |                                   | rs12866004  | 0.763 | INTERGENIC                      |        |                                                                                                                                |
|           |     |           |                                   | rs11618858  | 0.763 | INTERGENIC                      |        |                                                                                                                                |
|           |     |           |                                   | rs7994761   | 0.763 | INTERGENIC                      |        |                                                                                                                                |
|           |     |           |                                   | rs9506820   | 0.696 | INTERGENIC                      |        |                                                                                                                                |
| rs3827066 | 20  | 44586023  | <a href="#">PCIF1-ZNF335-MMP9</a> | rs73128528  | 0.922 | INTRONIC                        | ZNF335 | 243961                                                                                                                         |
|           |     |           |                                   |             |       | INTRONIC                        | ZNF335 | 322927                                                                                                                         |
|           |     |           |                                   |             |       | INTRONIC                        | ZNF335 | 426788                                                                                                                         |
|           |     |           |                                   | rs17448653  | 0.629 | DOWNSTREAM                      | ZNF335 | 494955                                                                                                                         |
|           |     |           |                                   |             |       | INTRONIC                        | ZNF335 | 243961                                                                                                                         |
|           |     |           |                                   |             |       | INTRONIC                        | ZNF335 | 322927                                                                                                                         |
|           |     |           |                                   |             |       | INTRONIC                        | ZNF335 | 426788                                                                                                                         |
|           |     |           |                                   |             |       | UPSTREAM                        | ZNF335 | 475002                                                                                                                         |
|           |     |           |                                   |             |       | WITHIN_NON_CODING_GENE          | ZNF335 | 476822                                                                                                                         |
|           |     |           |                                   |             |       |                                 |        |                                                                                                                                |
|           |     |           |                                   |             |       |                                 |        |                                                                                                                                |
| rs2836411 | 21  | 39819830  | <a href="#">ERG</a>               | rs2836399   | 0.555 | INTRONIC                        | ERG    | 288319, 357391, 398897, 398899, 398905, 398907, 398910, 398911, 398916, 398919, 415743, 417133, 429727, 442448, 451178, 453032 |
|           |     |           |                                   |             |       | WITHIN_NON_CODING_GENE          | ERG    | 468474, 473107, 481609, 492833                                                                                                 |
|           |     |           |                                   |             |       |                                 |        |                                                                                                                                |
|           |     |           |                                   | rs2298336   | 0.53  | INTRONIC                        | ERG    | 288319, 357391, 398897, 398899, 398905, 398907, 398910, 398911, 398916, 398919, 415743, 417133, 429727, 442448, 451178, 453032 |
|           |     |           |                                   |             |       | WITHIN_NON_CODING_GENE          | ERG    | 468474, 473107, 481609, 492833                                                                                                 |
|           |     |           |                                   |             |       |                                 |        |                                                                                                                                |
|           |     |           |                                   | rs2836402   | 0.53  | INTRONIC                        | ERG    | 288319, 357391, 398897,                                                                                                        |

|           |       |          |                        |     |                                                                                                                                |
|-----------|-------|----------|------------------------|-----|--------------------------------------------------------------------------------------------------------------------------------|
|           |       |          |                        |     | 398899, 398905, 398907, 398910, 398911, 398916, 398919, 415743, 417133, 429727, 442448, 451178, 453032                         |
|           |       |          | WITHIN_NON_CODING_GENE | ERG | 468474, 473107, 481609, 492833                                                                                                 |
| rs2836400 | 0.519 | INTRONIC |                        | ERG | 288319, 357391, 398897, 398899, 398905, 398907, 398910, 398911, 398916, 398919, 415743, 417133, 429727, 442448, 451178, 453032 |
|           |       |          | WITHIN_NON_CODING_GENE | ERG | 468474, 473107, 481609, 492833                                                                                                 |
| rs2836407 | 0.519 | INTRONIC |                        | ERG | 288319, 357391, 398897, 398899, 398905, 398907, 398910, 398911, 398916, 398919, 415743, 417133, 429727, 442448, 451178, 453032 |
|           |       |          | UPSTREAM               | ERG | 492833                                                                                                                         |
|           |       |          | WITHIN_NON_CODING_GENE | ERG | 468474, 473107, 481609                                                                                                         |
| rs2836409 | 0.519 | INTRONIC |                        | ERG | 288319, 398897, 398899, 398905, 398907, 398910, 398911, 398916, 398919, 417133, 442448, 451178, 453032                         |
|           |       |          | UPSTREAM               | ERG | 357391, 415743, 429727, 492833                                                                                                 |
|           |       |          | WITHIN_NON_CODING_GENE | ERG | 468474, 473107, 481609                                                                                                         |

## GWAS3D ANALYSIS

The 9 AAA GWAS SNPs (LeadSNP) were entered into the GWAS3D<sup>106</sup> web-portal (<http://jjwanglab.org/gwas3d>), using the following settings: 1. SNP dataset: 1000 Genomes pilot 1, 2. Population: EUR, 3. LD threshold:  $R^2 > 0.8$ , 4. Cell type: All; and 5. all ENCODE TF Family Motifs (binding site P-value 0.02).

The predicted lead functional SNP (Fn\_SNPID) associations for the 9 AAA SNPs are shown in **Figure 4 and Online Table XVI**. For example, the AAA GWAS SNP rs602633 is in high LD with rs599839, which has previously been associated with AAA<sup>3</sup>. GWAS3D predicted the rs599839 variant to alter STAT, Ets, p300 and RFX5 binding affinities.

The extended list of potential functional variant associations within each locus is shown in **Online Table XVII**. All AAA SNPs were predicted to be associated with transcription factor binding site affinity variants and eight map to interactions with distal regions.

**Online Table XVI:** Lead functional associations for each of the 9 replicated AAA SNPs.

| Fn_SNPID   | Chr:Position | Locus    | Combined P             | LeadSNP    | GWAS P                | R <sup>2</sup> | Status                                                                                |
|------------|--------------|----------|------------------------|------------|-----------------------|----------------|---------------------------------------------------------------------------------------|
| rs4977575  | 9:22124744   | 9p21.3   | $1.70 \times 10^{-35}$ | rs10757274 | $1.5 \times 10^{-33}$ | 0.87           | 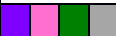   |
| rs73128528 | 20:44582187  | ZNF335   | $3.72 \times 10^{-19}$ | rs3827066  | $2.1 \times 10^{-17}$ | 0.83           | 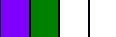   |
| rs73015013 | 19:11190873  | 19p13.2  | $2.58 \times 10^{-16}$ | rs6511720  | $7.9 \times 10^{-14}$ | 0.94           | 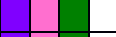  |
| rs4845620  | 1:154406656  | IL6R     | $9.92 \times 10^{-15}$ | rs4129267  | $4.8 \times 10^{-13}$ | 0.87           | 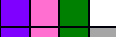 |
| rs1660368  | 1:214407335  | 1q32.3   | $4.64 \times 10^{-14}$ | rs1795061  | $8.8 \times 10^{-11}$ | 0.97           | 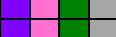 |
| rs599839   | 1:109822166  | 1p13.3   | $3.07 \times 10^{-13}$ | rs602633   | $6.6 \times 10^{-9}$  | 0.92           | 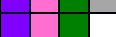 |
| rs9510086  | 13:22862440  | 13q12.11 | $8.33 \times 10^{-12}$ | rs9316871  | $4.8 \times 10^{-10}$ | 0.82           | 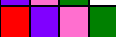 |
| rs10985349 | 9:124425243  | DAB2IP   | $7.46 \times 10^{-11}$ | rs10985349 | $2.4 \times 10^{-11}$ | 1              | 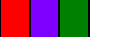 |
| rs2836411  | 21:39819830  | ERG      | $4.72 \times 10^{-9}$  | rs2836411  | $5.8 \times 10^{-9}$  | 1              | 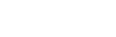 |

|                                                                                     |                                        |  |  |
|-------------------------------------------------------------------------------------|----------------------------------------|--|--|
| 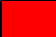 | Leading variant                        |  |  |
| 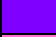 | Significant TFBS                       |  |  |
| 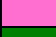 | Mapping on distal interaction          |  |  |
| 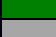 | Mapping on putative enhancer region    |  |  |
| 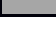 | Mapping on GERP++ conservation element |  |  |

**Online Table XVII:** Significant regulatory variants detected by the GWAS3D algorithm. Status: distal interaction (td), transcription factor binding affinity (bda), chromatin modification state (chromhmm), sites under evolutionary constraint (gerp). This table spans 4 pages.

| SNPID      | CHRPOS     | GENOTYPE | LOCUS  | FINALP                 | LeadSNP    | LEADSNP_P              | RSQUARE | STATUS               |
|------------|------------|----------|--------|------------------------|------------|------------------------|---------|----------------------|
| rs4977575  | 9:22124744 | C G      | 9p21.3 | 1.70x10 <sup>-35</sup> | rs10757274 | 1.54x10 <sup>-33</sup> | 0.87    | td,bda,enhancer,gerp |
| rs1333049  | 9:22125503 | G C      | 9p21.3 | 3.13x10 <sup>-35</sup> | rs10757274 | 1.54x10 <sup>-33</sup> | 0.88    | td,bda,enhancer      |
| rs1333046  | 9:22124123 | T A      | 9p21.3 | 6.47x10 <sup>-35</sup> | rs10757274 | 1.54x10 <sup>-33</sup> | 0.93    | td,bda,enhancer      |
| rs10738610 | 9:22123766 | A C      | 9p21.3 | 4.51x10 <sup>-34</sup> | rs10757274 | 1.54x10 <sup>-33</sup> | 0.93    | td,bda,enhancer      |
| rs7857118  | 9:22124140 | A T      | 9p21.3 | 4.85x10 <sup>-34</sup> | rs10757274 | 1.54x10 <sup>-33</sup> | 0.92    | td,bda,enhancer      |
| rs7859362  | 9:22105927 | T C      | ANRIL  | 7.83x10 <sup>-34</sup> | rs10757274 | 1.54x10 <sup>-33</sup> | 0.93    | td,bda,enhancer      |
| rs10217586 | 9:22121349 | A T      | 9p21.3 | 9.21x10 <sup>-34</sup> | rs10757274 | 1.54x10 <sup>-33</sup> | 0.81    | td,bda,enhancer      |
| rs7859727  | 9:22102165 | C T      | ANRIL  | 1.12x10 <sup>-33</sup> | rs10757274 | 1.54x10 <sup>-33</sup> | 0.97    | td,bda,enhancer      |
| rs10811656 | 9:22124472 | C T      | 9p21.3 | 1.19x10 <sup>-33</sup> | rs10757274 | 1.54x10 <sup>-33</sup> | 0.85    | td,bda,enhancer      |
| rs1333043  | 9:22106731 | T A      | ANRIL  | 2.16x10 <sup>-33</sup> | rs10757274 | 1.54x10 <sup>-33</sup> | 0.93    | td,bda,enhancer      |
| rs2891168  | 9:22098619 | A G      | ANRIL  | 2.44x10 <sup>-33</sup> | rs10757274 | 1.54x10 <sup>-33</sup> | 0.99    | td,bda,enhancer      |
| rs10738608 | 9:22094796 | A C      | ANRIL  | 2.72x10 <sup>-33</sup> | rs10757274 | 1.54x10 <sup>-33</sup> | 0.95    | td,bda,enhancer      |
| rs10738607 | 9:22088094 | A G      | ANRIL  | 2.72x10 <sup>-33</sup> | rs10757274 | 1.54x10 <sup>-33</sup> | 0.95    | td,bda,enhancer      |
| rs6475609  | 9:22106271 | A G      | ANRIL  | 4.57x10 <sup>-33</sup> | rs10757274 | 1.54x10 <sup>-33</sup> | 0.93    | td,bda,enhancer      |
| rs2383207  | 9:22115959 | A G      | ANRIL  | 4.60x10 <sup>-33</sup> | rs10757274 | 1.54x10 <sup>-33</sup> | 0.90    | td,bda,enhancer      |
| rs1537370  | 9:22084310 | C T      | ANRIL  | 1.19x10 <sup>-32</sup> | rs10757274 | 1.54x10 <sup>-33</sup> | 0.84    | td,bda,enhancer      |
| rs10511701 | 9:22112599 | T C      | ANRIL  | 1.39x10 <sup>-32</sup> | rs10757274 | 1.54x10 <sup>-33</sup> | 0.90    | td,bda,enhancer      |
| rs1333047  | 9:22124504 | A T      | 9p21.3 | 1.53x10 <sup>-32</sup> | rs10757274 | 1.54x10 <sup>-33</sup> | 0.87    | td,bda,enhancer      |
| rs10757275 | 9:22106225 | G A      | ANRIL  | 1.67x10 <sup>-32</sup> | rs10757274 | 1.54x10 <sup>-33</sup> | 0.94    | td,bda,enhancer      |
| rs1333048  | 9:22125347 | A C      | 9p21.3 | 1.67x10 <sup>-32</sup> | rs10757274 | 1.54x10 <sup>-33</sup> | 0.94    | td,bda,enhancer      |
| rs4977574  | 9:22098574 | A G      | ANRIL  | 2.01x10 <sup>-32</sup> | rs10757274 | 1.54x10 <sup>-33</sup> | 0.99    | td,bda,enhancer      |
| rs10757278 | 9:22124477 | A G      | 9p21.3 | 2.25x10 <sup>-32</sup> | rs10757274 | 1.54x10 <sup>-33</sup> | 0.88    | td,bda,enhancer      |
| rs1537374  | 9:22116046 | A G      | ANRIL  | 2.27x10 <sup>-32</sup> | rs10757274 | 1.54x10 <sup>-33</sup> | 0.90    | td,bda,enhancer      |
| rs1537375  | 9:22116071 | T C      | ANRIL  | 2.66x10 <sup>-32</sup> | rs10757274 | 1.54x10 <sup>-33</sup> | 0.91    | td,bda,enhancer      |
| rs7341791  | 9:22112427 | A G      | ANRIL  | 2.69x10 <sup>-32</sup> | rs10757274 | 1.54x10 <sup>-33</sup> | 0.89    | td,bda,enhancer      |
| rs10757279 | 9:22124630 | A G      | 9p21.3 | 3.05x10 <sup>-32</sup> | rs10757274 | 1.54x10 <sup>-33</sup> | 0.88    | td,bda,enhancer      |
| rs2383206  | 9:22115026 | A G      | ANRIL  | 3.05x10 <sup>-32</sup> | rs10757274 | 1.54x10 <sup>-33</sup> | 0.90    | td,bda,enhancer      |
| rs7341786  | 9:22112241 | A C      | ANRIL  | 3.35x10 <sup>-32</sup> | rs10757274 | 1.54x10 <sup>-33</sup> | 0.89    | td,bda,enhancer      |
| rs10757272 | 9:22088260 | C T      | ANRIL  | 3.38x10 <sup>-32</sup> | rs10757274 | 1.54x10 <sup>-33</sup> | 0.96    | td,bda,enhancer      |
| rs1537376  | 9:22116220 | T C      | ANRIL  | 3.95x10 <sup>-32</sup> | rs10757274 | 1.54x10 <sup>-33</sup> | 0.90    | td,bda,enhancer      |
| rs1537373  | 9:22103341 | T G      | ANRIL  | 5.37x10 <sup>-32</sup> | rs10757274 | 1.54x10 <sup>-33</sup> | 0.96    | td,bda,enhancer      |
| rs10757274 | 9:22096055 | A G      | ANRIL  | 6.09x10 <sup>-32</sup> | rs10757274 | 1.54x10 <sup>-33</sup> | 1.00    | td,bda,enhancer,self |
| rs2210538  | 9:22092257 | G A      | ANRIL  | 6.51x10 <sup>-32</sup> | rs10757274 | 1.54x10 <sup>-33</sup> | 0.85    | td,bda,enhancer      |
| rs1537371  | 9:22099568 | C A      | ANRIL  | 6.84x10 <sup>-32</sup> | rs10757274 | 1.54x10 <sup>-33</sup> | 0.96    | td,bda,enhancer      |
| rs10757277 | 9:22124450 | A G      | 9p21.3 | 6.93x10 <sup>-32</sup> | rs10757274 | 1.54x10 <sup>-33</sup> | 0.88    | td,bda,enhancer      |
| rs10733376 | 9:22114469 | G C      | ANRIL  | 7.49x10 <sup>-32</sup> | rs10757274 | 1.54x10 <sup>-33</sup> | 0.90    | td,bda,enhancer      |

| SNPID          | CHRPOS      | GENOTYPE | LOCUS    | FINALP                 | LeadSNP    | LEADSNP_P              | RSQUARE | STATUS                     |
|----------------|-------------|----------|----------|------------------------|------------|------------------------|---------|----------------------------|
| rs10738606     | 9:22088090  | A T      | ANRIL    | 9.11x10 <sup>-32</sup> | rs10757274 | 1.54x10 <sup>-33</sup> | 0.95    | td,bda,enhancer            |
| rs4977757      | 9:22094330  | A G      | ANRIL    | 9.23x10 <sup>-32</sup> | rs10757274 | 1.54x10 <sup>-33</sup> | 0.91    | td,bda,enhancer            |
| rs1004638      | 9:22115589  | A T      | ANRIL    | 9.85x10 <sup>-32</sup> | rs10757274 | 1.54x10 <sup>-33</sup> | 0.90    | td,bda,enhancer            |
| rs10738609     | 9:22114495  | A C,G,T  | ANRIL    | 1.05x10 <sup>-31</sup> | rs10757274 | 1.54x10 <sup>-33</sup> | 0.91    | td,bda,enhancer            |
| rs9644860      | 9:22090603  | C T      | ANRIL    | 1.08x10 <sup>-31</sup> | rs10757274 | 1.54x10 <sup>-33</sup> | 0.81    | td,bda,enhancer            |
| rs944797       | 9:22115286  | T C      | ANRIL    | 1.14x10 <sup>-31</sup> | rs10757274 | 1.54x10 <sup>-33</sup> | 0.90    | td,bda,enhancer            |
| rs1556516      | 9:22100176  | G C      | ANRIL    | 1.37x10 <sup>-31</sup> | rs10757274 | 1.54x10 <sup>-33</sup> | 0.96    | td,bda,enhancer            |
| rs10116277     | 9:22081397  | G T      | ANRIL    | 1.58x10 <sup>-31</sup> | rs10757274 | 1.54x10 <sup>-33</sup> | 0.85    | td,bda,enhancer            |
| rs1412834      | 9:22110131  | T C      | ANRIL    | 1.59x10 <sup>-31</sup> | rs10757274 | 1.54x10 <sup>-33</sup> | 0.91    | td,bda,enhancer            |
| rs1333042      | 9:22103813  | A G      | ANRIL    | 1.84x10 <sup>-31</sup> | rs10757274 | 1.54x10 <sup>-33</sup> | 0.95    | td,bda,enhancer            |
| rs6475606      | 9:22081850  | C T      | ANRIL    | 2.11x10 <sup>-31</sup> | rs10757274 | 1.54x10 <sup>-33</sup> | 0.85    | td,bda,enhancer            |
| rs1970112      | 9:22085598  | T C      | ANRIL    | 2.49x10 <sup>-31</sup> | rs10757274 | 1.54x10 <sup>-33</sup> | 0.86    | td,bda,enhancer            |
| rs73128528     | 20:44582187 | A T      | ZNF335   | 3.72x10 <sup>-19</sup> | rs3827066  | 2.10x10 <sup>-17</sup> | 0.83    | bda,enhancer               |
| rs7267295      | 20:44570683 | C T      | PCIF1    | 4.78x10 <sup>-18</sup> | rs3827066  | 2.10x10 <sup>-17</sup> | 0.84    | td,bda,enhancer            |
| rs58749629     | 20:44571317 | G A      | PCIF1    | 1.84x10 <sup>-16</sup> | rs3827066  | 2.10x10 <sup>-17</sup> | 0.91    | td,bda,enhancer            |
| rs73015013     | 19:11190873 | C T      | 19p13.2  | 2.58x10 <sup>-16</sup> | rs6511720  | 7.90x10 <sup>-14</sup> | 0.94    | td,bda,enhancer            |
| rs8124182      | 20:44608901 | G A      | 20q13.12 | 2.86x10 <sup>-16</sup> | rs3827066  | 2.10x10 <sup>-17</sup> | 0.84    | td,bda,enhancer            |
| rs7270354      | 20:44607661 | G A      | 20q13.12 | 4.86x10 <sup>-16</sup> | rs3827066  | 2.10x10 <sup>-17</sup> | 0.91    | td,bda,enhancer            |
| chr19:11190074 | 19:11190074 | G A      | 19p13.2  | 1.41x10 <sup>-15</sup> | rs6511720  | 7.90x10 <sup>-14</sup> | 0.96    | td,bda,enhancer            |
| chr19:11189272 | 19:11189272 | T C      | 19p13.2  | 1.65x10 <sup>-15</sup> | rs6511720  | 7.90x10 <sup>-14</sup> | 0.94    | td,bda,enhancer            |
| chr19:11189937 | 19:11189937 | T A      | 19p13.2  | 1.81x10 <sup>-15</sup> | rs6511720  | 7.90x10 <sup>-14</sup> | 0.96    | td,bda,enhancer            |
| rs6511720      | 19:11202306 | G T      | LDLR     | 2.06x10 <sup>-15</sup> | rs6511720  | 7.90x10 <sup>-14</sup> | 1       | bda,enhancer,chromhmm,self |
| rs56289821     | 19:11188247 | G A      | 19p13.2  | 3.84x10 <sup>-15</sup> | rs6511720  | 7.90x10 <sup>-14</sup> | 0.92    | td,bda,enhancer            |
| rs8106503      | 19:11196886 | T C      | 19p13.2  | 6.27x10 <sup>-15</sup> | rs6511720  | 7.90x10 <sup>-14</sup> | 0.94    | td,bda,enhancer,chromhmm   |
| rs4845620      | 1:154406656 | A G      | IL6R     | 9.92x10 <sup>-15</sup> | rs4129267  | 4.76x10 <sup>-13</sup> | 0.87    | td,bda,enhancer            |
| rs17248720     | 19:11198187 | C T      | LDLR     | 1.87x10 <sup>-14</sup> | rs6511720  | 7.90x10 <sup>-14</sup> | 0.91    | td,bda,enhancer,chromhmm   |
| rs1660368      | 1:214407335 | C T      | 1q32.3   | 4.64x10 <sup>-14</sup> | rs1795061  | 8.80x10 <sup>-11</sup> | 0.97    | td,bda,enhancer,gerp       |
| rs4537545      | 1:154418879 | C T      | IL6R     | 4.72x10 <sup>-14</sup> | rs4129267  | 4.76x10 <sup>-13</sup> | 0.87    | td,bda,enhancer            |
| chr19:11187358 | 19:11187358 | T G      | 19p13.2  | 5.55x10 <sup>-14</sup> | rs6511720  | 7.90x10 <sup>-14</sup> | 0.92    | td,bda,enhancer            |
| rs56383622     | 1:154405024 | A G      | IL6R     | 5.67x10 <sup>-14</sup> | rs4129267  | 4.76x10 <sup>-13</sup> | 0.87    | td,bda,enhancer            |
| chr19:11191197 | 19:11191197 | G A      | 19p13.2  | 7.26x10 <sup>-14</sup> | rs6511720  | 7.90x10 <sup>-14</sup> | 0.94    | td,bda,enhancer            |
| rs57217136     | 19:11201124 | T C      | LDLR     | 8.82x10 <sup>-14</sup> | rs6511720  | 7.90x10 <sup>-14</sup> | 1       | bda,enhancer,chromhmm      |
| rs4129267      | 1:154426264 | C T      | IL6R     | 9.12x10 <sup>-14</sup> | rs4129267  | 4.76x10 <sup>-13</sup> | 1       | bda,enhancer,self          |
| rs12151108     | 19:11197261 | G A      | 19p13.2  | 1.10x10 <sup>-13</sup> | rs6511720  | 7.90x10 <sup>-14</sup> | 0.93    | td,bda,enhancer            |
| rs17248727     | 19:11198502 | T C      | LDLR     | 1.31x10 <sup>-13</sup> | rs6511720  | 7.90x10 <sup>-14</sup> | 0.92    | td,bda,enhancer,chromhmm   |
| rs2228145      | 1:154426970 | A C,T    | IL6R     | 1.39x10 <sup>-13</sup> | rs4129267  | 4.76x10 <sup>-13</sup> | 0.99    | bda,enhancer               |
| chr19:11189205 | 19:11189205 | C G      | 19p13.2  | 1.54x10 <sup>-13</sup> | rs6511720  | 7.90x10 <sup>-14</sup> | 0.94    | td,bda,enhancer            |
| chr19:11189980 | 19:11189980 | C A      | 19p13.2  | 1.73x10 <sup>-13</sup> | rs6511720  | 7.90x10 <sup>-14</sup> | 0.96    | td,bda,enhancer            |
| chr19:11188899 | 19:11188899 | C T      | 19p13.2  | 1.74x10 <sup>-13</sup> | rs6511720  | 7.90x10 <sup>-14</sup> | 0.94    | td,bda,enhancer            |
| rs73015021     | 19:11192915 | A G      | 19p13.2  | 1.91x10 <sup>-13</sup> | rs6511720  | 7.90x10 <sup>-14</sup> | 0.96    | td,bda,enhancer            |

| SNPID          | CHRPOS      | GENOTYPE | LOCUS       | FINALP                 | LeadSNP   | LEADSNP_P              | RSQUARE | STATUS               |
|----------------|-------------|----------|-------------|------------------------|-----------|------------------------|---------|----------------------|
| chr19:11190544 | 19:11190544 | C T      | 19p13.2     | 2.15x10 <sup>-13</sup> | rs6511720 | 7.90x10 <sup>-14</sup> | 0.88    | td,bda,enhancer      |
| rs6684439      | 1:154395839 | C T      | <i>IL6R</i> | 2.51x10 <sup>-13</sup> | rs4129267 | 4.76x10 <sup>-13</sup> | 0.83    | td,bda,enhancer      |
| chr19:11191729 | 19:11191729 | C T      | 19p13.2     | 2.95x10 <sup>-13</sup> | rs6511720 | 7.90x10 <sup>-14</sup> | 0.94    | td,bda,enhancer      |
| rs599839       | 1:109822166 | G A      | 1p13.3      | 3.07x10 <sup>-13</sup> | rs602633  | 6.58x10 <sup>-09</sup> | 0.92    | td,bda,enhancer,gerp |
| chr19:11190481 | 19:11190481 | G T      | 19p13.2     | 3.15x10 <sup>-13</sup> | rs6511720 | 7.90x10 <sup>-14</sup> | 0.96    | td,bda,enhancer      |
| rs10412048     | 19:11193949 | A G      | 19p13.2     | 3.58x10 <sup>-13</sup> | rs6511720 | 7.90x10 <sup>-14</sup> | 0.93    | td,bda,enhancer      |
| rs73015011     | 19:11189764 | T C      | 19p13.2     | 3.78x10 <sup>-13</sup> | rs6511720 | 7.90x10 <sup>-14</sup> | 0.94    | td,bda,enhancer      |
| rs4845373      | 1:154417829 | C T      | <i>IL6R</i> | 4.52x10 <sup>-13</sup> | rs4129267 | 4.76x10 <sup>-13</sup> | 0.87    | td,bda,enhancer      |
| rs55997232     | 19:11188117 | C T      | 19p13.2     | 4.98x10 <sup>-13</sup> | rs6511720 | 7.90x10 <sup>-14</sup> | 0.94    | td,bda,enhancer      |
| rs56125973     | 19:11188164 | T C      | 19p13.2     | 5.03x10 <sup>-13</sup> | rs6511720 | 7.90x10 <sup>-14</sup> | 0.91    | td,bda,enhancer      |
| chr19:11188850 | 19:11188850 | T C      | 19p13.2     | 6.17x10 <sup>-13</sup> | rs6511720 | 7.90x10 <sup>-14</sup> | 0.93    | td,bda,enhancer      |
| rs12126142     | 1:154425456 | G A      | <i>IL6R</i> | 6.17x10 <sup>-13</sup> | rs4129267 | 4.76x10 <sup>-13</sup> | 1       | bda,enhancer         |
| chr19:11187422 | 19:11187422 | T C      | 19p13.2     | 6.25x10 <sup>-13</sup> | rs6511720 | 7.90x10 <sup>-14</sup> | 0.93    | td,bda,enhancer      |
| chr19:11190556 | 19:11190556 | T C      | 19p13.2     | 6.99x10 <sup>-13</sup> | rs6511720 | 7.90x10 <sup>-14</sup> | 0.93    | td,bda,enhancer      |
| rs10402112     | 19:11191677 | T A      | 19p13.2     | 7.26x10 <sup>-13</sup> | rs6511720 | 7.90x10 <sup>-14</sup> | 0.94    | td,bda,enhancer      |
| rs11265613     | 1:154418415 | T C      | <i>IL6R</i> | 7.93x10 <sup>-13</sup> | rs4129267 | 4.76x10 <sup>-13</sup> | 0.88    | td,bda,enhancer      |
| chr19:11187324 | 19:11187324 | C G      | 19p13.2     | 8.25x10 <sup>-13</sup> | rs6511720 | 7.90x10 <sup>-14</sup> | 0.93    | td,bda,enhancer      |
| rs55791371     | 19:11188153 | A C      | 19p13.2     | 8.67x10 <sup>-13</sup> | rs6511720 | 7.90x10 <sup>-14</sup> | 0.93    | td,bda,enhancer      |
| rs1147673      | 1:214402313 | A G      | 1q32.3      | 9.07x10 <sup>-13</sup> | rs1795061 | 8.80x10 <sup>-11</sup> | 0.93    | td,bda,enhancer      |
| rs61194703     | 19:11192193 | A T      | 19p13.2     | 9.20x10 <sup>-13</sup> | rs6511720 | 7.90x10 <sup>-14</sup> | 0.94    | td,bda,enhancer      |
| chr19:11190292 | 19:11190292 | T C      | 19p13.2     | 1.03x10 <sup>-12</sup> | rs6511720 | 7.90x10 <sup>-14</sup> | 0.94    | td,bda,enhancer      |
| rs4845622      | 1:154411419 | A C      | <i>IL6R</i> | 1.13x10 <sup>-12</sup> | rs4129267 | 4.76x10 <sup>-13</sup> | 0.87    | td,bda,enhancer      |
| rs73015024     | 19:11197598 | G T      | 19p13.2     | 1.13x10 <sup>-12</sup> | rs6511720 | 7.90x10 <sup>-14</sup> | 0.94    | td,bda,enhancer      |
| rs12133641     | 1:154428283 | A G      | <i>IL6R</i> | 1.32x10 <sup>-12</sup> | rs4129267 | 4.76x10 <sup>-13</sup> | 0.97    | bda,enhancer         |
| chr19:11190534 | 19:11190534 | G A      | 19p13.2     | 1.36x10 <sup>-12</sup> | rs6511720 | 7.90x10 <sup>-14</sup> | 0.93    | td,bda,enhancer      |
| chr19:11190110 | 19:11190110 | A G      | 19p13.2     | 1.44x10 <sup>-12</sup> | rs6511720 | 7.90x10 <sup>-14</sup> | 0.96    | td,bda,enhancer      |
| chr19:11190549 | 19:11190549 | G A      | 19p13.2     | 1.50x10 <sup>-12</sup> | rs6511720 | 7.90x10 <sup>-14</sup> | 0.93    | td,bda,enhancer      |
| rs73015016     | 19:11191300 | G A      | 19p13.2     | 1.56x10 <sup>-12</sup> | rs6511720 | 7.90x10 <sup>-14</sup> | 0.94    | td,bda,enhancer      |
| rs12730935     | 1:154419892 | G A      | <i>IL6R</i> | 1.60x10 <sup>-12</sup> | rs4129267 | 4.76x10 <sup>-13</sup> | 0.86    | td,bda               |
| chr19:11192831 | 19:11192831 | A G      | 19p13.2     | 1.88x10 <sup>-12</sup> | rs6511720 | 7.90x10 <sup>-14</sup> | 0.94    | td,bda,enhancer      |
| rs73015020     | 19:11192550 | G A      | 19p13.2     | 1.98x10 <sup>-12</sup> | rs6511720 | 7.90x10 <sup>-14</sup> | 0.93    | td,bda,enhancer      |
| rs4576655      | 1:154418749 | C T      | <i>IL6R</i> | 2.56x10 <sup>-12</sup> | rs4129267 | 4.76x10 <sup>-13</sup> | 0.88    | td,bda,enhancer      |
| rs4845621      | 1:154409730 | G A      | <i>IL6R</i> | 2.95x10 <sup>-12</sup> | rs4129267 | 4.76x10 <sup>-13</sup> | 0.87    | td,bda               |
| rs4393147      | 1:154414037 | C T      | <i>IL6R</i> | 3.16x10 <sup>-12</sup> | rs4129267 | 4.76x10 <sup>-13</sup> | 0.87    | td,bda,enhancer      |
| rs12753254     | 1:154416935 | G A      | <i>IL6R</i> | 3.49x10 <sup>-12</sup> | rs4129267 | 4.76x10 <sup>-13</sup> | 0.87    | td,bda,enhancer      |
| rs4845372      | 1:154415396 | C A      | <i>IL6R</i> | 4.58x10 <sup>-12</sup> | rs4129267 | 4.76x10 <sup>-13</sup> | 0.83    | td,bda,enhancer      |
| rs6664201      | 1:154414296 | C T      | <i>IL6R</i> | 5.08x10 <sup>-12</sup> | rs4129267 | 4.76x10 <sup>-13</sup> | 0.87    | td,bda,enhancer      |
| rs4845623      | 1:154415777 | A G      | <i>IL6R</i> | 5.10x10 <sup>-12</sup> | rs4129267 | 4.76x10 <sup>-13</sup> | 0.83    | td,bda,enhancer      |
| rs7521458      | 1:154407713 | T C      | <i>IL6R</i> | 5.55x10 <sup>-12</sup> | rs4129267 | 4.76x10 <sup>-13</sup> | 0.87    | td,bda               |
| rs12730036     | 1:154416969 | C T      | <i>IL6R</i> | 6.86x10 <sup>-12</sup> | rs4129267 | 4.76x10 <sup>-13</sup> | 0.87    | td,bda,enhancer      |

| SNPID      | CHRPOS      | GENOTYPE | LOCUS         | FINALP                 | LeadSNP    | LEADSNP_P              | RSQUARE | STATUS                        |
|------------|-------------|----------|---------------|------------------------|------------|------------------------|---------|-------------------------------|
| rs9510086  | 13:22862440 | G C      | 13q12.11      | 8.33x10 <sup>-12</sup> | rs9316871  | 4.80x10 <sup>-10</sup> | 0.81    | td,bda,enhancer               |
| rs7518199  | 1:154407419 | A C      | <i>IL6R</i>   | 8.49x10 <sup>-12</sup> | rs4129267  | 4.76x10 <sup>-13</sup> | 0.87    | td,bda,enhancer               |
| rs4453032  | 1:154414086 | A G      | <i>IL6R</i>   | 8.54x10 <sup>-12</sup> | rs4129267  | 4.76x10 <sup>-13</sup> | 0.87    | td,bda,enhancer               |
| rs1795065  | 1:214405194 | G A      | 1q32.3        | 1.75x10 <sup>-11</sup> | rs1795061  | 8.80x10 <sup>-11</sup> | 0.97    | td,bda,enhancer               |
| rs1795060  | 1:214410021 | C T      | 1q32.3        | 1.90x10 <sup>-11</sup> | rs1795061  | 8.80x10 <sup>-11</sup> | 1       | bda,enhancer                  |
| rs12740374 | 1:109817590 | G T      | <i>CELSR2</i> | 2.07x10 <sup>-11</sup> | rs602633   | 6.58x10 <sup>-09</sup> | 0.90    | td,bda,enhancer,chromhmm,gerp |
| rs904320   | 1:214408457 | A T      | 1q32.3        | 4.93x10 <sup>-11</sup> | rs1795061  | 8.80x10 <sup>-11</sup> | 0.98    | td,bda,enhancer               |
| rs1795061  | 1:214409280 | T C      | 1q32.3        | 5.62x10 <sup>-11</sup> | rs1795061  | 8.80x10 <sup>-11</sup> | 1       | td,bda,enhancer,self          |
| rs629301   | 1:109818306 | G T      | <i>CELSR2</i> | 7.32x10 <sup>-11</sup> | rs602633   | 6.58x10 <sup>-09</sup> | 0.90    | td,bda,enhancer,chromhmm,gerp |
| rs10985349 | 9:124425243 | C T      | <i>DAB2IP</i> | 7.46x10 <sup>-11</sup> | rs10985349 | 2.40x10 <sup>-11</sup> | 1       | td,bda,enhancer,self          |
| rs10985350 | 9:124429196 | A C      | <i>DAB2IP</i> | 1.67x10 <sup>-10</sup> | rs10985349 | 2.40x10 <sup>-11</sup> | 0.81    | td,bda,enhancer               |
| rs660240   | 1:109817838 | T C      | <i>CELSR2</i> | 1.88x10 <sup>-10</sup> | rs602633   | 6.58x10 <sup>-09</sup> | 0.96    | td,bda,enhancer,chromhmm,gerp |
| rs7528419  | 1:109817192 | A G      | <i>CELSR2</i> | 4.03x10 <sup>-10</sup> | rs602633   | 6.58x10 <sup>-09</sup> | 0.90    | td,bda,enhancer,chromhmm,gerp |
| rs1795064  | 1:214406272 | C T      | 1q32.3        | 5.07x10 <sup>-10</sup> | rs1795061  | 8.80x10 <sup>-11</sup> | 0.97    | td,bda,enhancer               |
| rs1795062  | 1:214406721 | T C      | 1q32.3        | 5.73x10 <sup>-10</sup> | rs1795061  | 8.80x10 <sup>-11</sup> | 0.97    | td,bda,enhancer               |
| rs1660371  | 1:214409248 | T A      | 1q32.3        | 9.29x10 <sup>-10</sup> | rs1795061  | 8.80x10 <sup>-11</sup> | 0.97    | td,bda,enhancer               |
| rs1795063  | 1:214406508 | G A      | 1q32.3        | 9.72x10 <sup>-10</sup> | rs1795061  | 8.80x10 <sup>-11</sup> | 0.97    | td,bda,enhancer               |
| rs9316871  | 13:22861921 | A G      | 13q12.11      | 1.26x10 <sup>-09</sup> | rs9316871  | 4.80x10 <sup>-10</sup> | 1       | td,bda,enhancer,self          |
| rs9506822  | 13:22862220 | A G      | 13q12.11      | 1.89x10 <sup>-09</sup> | rs9316871  | 4.80x10 <sup>-10</sup> | 0.87    | td,bda,enhancer               |
| rs2836411  | 21:39819830 | C T      | <i>ERG</i>    | 4.72x10 <sup>-09</sup> | rs2836411  | 5.80x10 <sup>-09</sup> | 1       | bda,enhancer,self             |

107

## BIOINFORMATIC IDENTIFICATION OF CANDIDATE AAA GENES AND PATHWAYS USING DEPICT

An integrated gene function analysis was performed using the DEPICT version 1.1 tool<sup>108</sup>. DEPICT was installed, tested and run using meta-GWAS summary statistics following the recommended procedure outlined at <https://github.com/perslab/depict>. Two separate runs were performed using either all independent SNPs with discovery metaGWAS  $P < 5 \times 10^{-6}$  or just those 10 SNPs which reached  $P < 1 \times 10^{-6}$  in the combined analysis. Results are shown in **Online Table XVIII** and the full dataset is available in the online data supplement.

### Online Table XVIII, DEPICT gene enrichment sets (nominal $P < 0.05$ ) based on the top 10 validated loci.

There is a notable presence of descriptions associated with transforming growth factor beta regulation, lipoprotein metabolism, inflammation induced extracellular matrix remodelling (eg. RFX1), vascular smooth muscle cell function, vascular injury (including haemorrhage), immune cell function (particularly T & B cells), acute phase response (including IL6 secretion), apoptosis, hyperglycemia and the PIK3K, JNK and MAPK cascades. In addition, there are several descriptions associated with long bone size, an observation which may be consistent with previous reports linking height with cardiovascular disease risk. All gene sets had a false discovery rate  $> 0.2$  with the exception of the most significant gene set, MP:0006396 (decreased long bone epiphyseal plate size), where the FDR was  $< 0.2$ . This table spans 11 pages.

| Original gene set ID | Original gene set description                    | DEPICT Nominal P-value |
|----------------------|--------------------------------------------------|------------------------|
| MP:0006396           | decreased long bone epiphyseal plate size        | $1.14 \times 10^{-9}$  |
| GO:0034381           | plasma lipoprotein particle clearance            | $5.22 \times 10^{-7}$  |
| ENSG00000205250      | E2F4 PPI subnetwork                              | $1.27 \times 10^{-6}$  |
| ENSG00000132005      | RFX1 PPI subnetwork                              | $2.28 \times 10^{-6}$  |
| MP:0000708           | thymus hyperplasia                               | $6.32 \times 10^{-6}$  |
| ENSG00000167553      | TUBA1C PPI subnetwork                            | $3.18 \times 10^{-5}$  |
| ENSG00000170421      | KRT8 PPI subnetwork                              | $9.59 \times 10^{-5}$  |
| MP:0003645           | increased pancreatic beta cell number            | $1.12 \times 10^{-4}$  |
| ENSG00000166866      | MYO1A PPI subnetwork                             | $2.32 \times 10^{-4}$  |
| REACTOME             | REACTOME_apoptotic_execution__phase              | $2.92 \times 10^{-4}$  |
| MP:0008182           | decreased marginal zone B cell number            | $3.06 \times 10^{-4}$  |
| GO:0008375           | acetylglucosaminyltransferase activity           | $3.62 \times 10^{-4}$  |
| ENSG00000131941      | RHPN2 PPI subnetwork                             | $3.75 \times 10^{-4}$  |
| ENSG00000169710      | FASN PPI subnetwork                              | $4.55 \times 10^{-4}$  |
| REACTOME             | Reactome_apoptotic_cleavage_of_cellular_proteins | $5.46 \times 10^{-4}$  |
| ENSG0000013297       | CLDN11 PPI subnetwork                            | $6.28 \times 10^{-4}$  |
| ENSG00000070159      | PTPN3 PPI subnetwork                             | $6.56 \times 10^{-4}$  |
| ENSG00000091409      | ITGA6 PPI subnetwork                             | $7.26 \times 10^{-4}$  |
| ENSG00000178209      | PLEC PPI subnetwork                              | $8.57 \times 10^{-4}$  |
| REACTOME             | Reactome_p75_ntr_receptor:mediated_signalling    | $1.07 \times 10^{-3}$  |
| GO:0001890           | placenta development                             | $1.08 \times 10^{-3}$  |
| ENSG00000164344      | KLKB1 PPI subnetwork                             | $1.09 \times 10^{-3}$  |
| MP:0002136           | abnormal kidney physiology                       | $1.17 \times 10^{-3}$  |
| MP:0002655           | abnormal keratinocyte morphology                 | $1.45 \times 10^{-3}$  |

| Original gene set ID | Original gene set description                                   | DEPICK Nominal P-value |
|----------------------|-----------------------------------------------------------------|------------------------|
| ENSG00000143375      | CGN PPI subnetwork                                              | 1.48x10 <sup>-3</sup>  |
| MP:0005595           | abnormal vascular smooth muscle physiology                      | 1.55x10 <sup>-3</sup>  |
| ENSG00000122641      | INHBA PPI subnetwork                                            | 1.79x10 <sup>-3</sup>  |
| MP:0002764           | short tibia                                                     | 1.79x10 <sup>-3</sup>  |
| MP:0003662           | abnormal long bone epiphyseal plate proliferative zone          | 2.01x10 <sup>-3</sup>  |
| ENSG00000169047      | IRS1 PPI subnetwork                                             | 2.21x10 <sup>-3</sup>  |
| ENSG00000125503      | PPP1R12C PPI subnetwork                                         | 2.23x10 <sup>-3</sup>  |
| MP:0001179           | thick pulmonary interalveolar septum                            | 2.30x10 <sup>-3</sup>  |
| GO:0043256           | laminin complex                                                 | 2.33x10 <sup>-3</sup>  |
| ENSG00000116809      | ZBTB17 PPI subnetwork                                           | 2.46x10 <sup>-3</sup>  |
| GO:0050431           | transforming growth factor beta binding                         | 2.47x10 <sup>-3</sup>  |
| ENSG00000039560      | RAI14 PPI subnetwork                                            | 2.60x10 <sup>-3</sup>  |
| ENSG00000164733      | CTSB PPI subnetwork                                             | 2.64x10 <sup>-3</sup>  |
| ENSG00000139567      | ACVRL1 PPI subnetwork                                           | 2.75x10 <sup>-3</sup>  |
| MP:0005590           | increased vasodilation                                          | 3.45x10 <sup>-3</sup>  |
| GO:0071813           | lipoprotein particle binding                                    | 3.51x10 <sup>-3</sup>  |
| GO:0071814           | protein-lipid complex binding                                   | 3.51x10 <sup>-3</sup>  |
| MP:0002082           | postnatal lethality                                             | 3.53x10 <sup>-3</sup>  |
| GO:0071902           | positive regulation of protein serine/threonine kinase activity | 3.87x10 <sup>-3</sup>  |
| ENSG00000130147      | SH3BP4 PPI subnetwork                                           | 3.91x10 <sup>-3</sup>  |
| GO:0005178           | integrin binding                                                | 4.08x10 <sup>-3</sup>  |
| ENSG00000133056      | PIK3C2B PPI subnetwork                                          | 4.40x10 <sup>-3</sup>  |
| ENSG00000172725      | CORO1B PPI subnetwork                                           | 4.45x10 <sup>-3</sup>  |
| ENSG00000136286      | MYO1G PPI subnetwork                                            | 4.65x10 <sup>-3</sup>  |
| ENSG00000078142      | PIK3C3 PPI subnetwork                                           | 4.72x10 <sup>-3</sup>  |
| MP:0005095           | decreased T cell proliferation                                  | 4.84x10 <sup>-3</sup>  |
| ENSG00000145715      | RASA1 PPI subnetwork                                            | 4.96x10 <sup>-3</sup>  |
| ENSG00000104725      | ENSG00000104725 PPI subnetwork                                  | 5.08x10 <sup>-3</sup>  |
| KEGG_PATHWAYS        | KEGG_PATHWAYS_IN_CANCER                                         | 5.17x10 <sup>-3</sup>  |
| GO:0008194           | UDP-glycosyltransferase activity                                | 5.46x10 <sup>-3</sup>  |
| ENSG00000078747      | ITCH PPI subnetwork                                             | 5.48x10 <sup>-3</sup>  |
| ENSG00000149257      | SERPINH1 PPI subnetwork                                         | 5.79x10 <sup>-3</sup>  |
| ENSG00000114062      | UBE3A PPI subnetwork                                            | 5.85x10 <sup>-3</sup>  |
| ENSG00000139144      | PIK3C2G PPI subnetwork                                          | 5.85x10 <sup>-3</sup>  |
| ENSG00000143393      | PI4KB PPI subnetwork                                            | 5.87x10 <sup>-3</sup>  |
| ENSG00000148498      | PARD3 PPI subnetwork                                            | 6.00x10 <sup>-3</sup>  |
| ENSG00000196455      | PIK3R4 PPI subnetwork                                           | 6.19x10 <sup>-3</sup>  |
| ENSG00000148660      | CAMK2G PPI subnetwork                                           | 6.48x10 <sup>-3</sup>  |
| ENSG00000034152      | MAP2K3 PPI subnetwork                                           | 6.58x10 <sup>-3</sup>  |
| ENSG00000123124      | WWP1 PPI subnetwork                                             | 6.95x10 <sup>-3</sup>  |
| MP:0008813           | decreased common myeloid progenitor cell number                 | 7.37x10 <sup>-3</sup>  |
| ENSG00000204175      | GPRIN2 PPI subnetwork                                           | 7.39x10 <sup>-3</sup>  |
| GO:0001772           | immunological synapse                                           | 7.40x10 <sup>-3</sup>  |
| REACTOME             | Reactome_caspase:mediated_cleavage_of_cytoskeletal_proteins     | 7.46x10 <sup>-3</sup>  |
| ENSG00000017427      | IGF1 PPI subnetwork                                             | 7.51x10 <sup>-3</sup>  |
| MP:0001954           | respiratory distress                                            | 7.56x10 <sup>-3</sup>  |
| GO:0016051           | carbohydrate biosynthetic process                               | 7.65x10 <sup>-3</sup>  |

| Original gene set ID | Original gene set description                          | DEPICK Nominal P-value |
|----------------------|--------------------------------------------------------|------------------------|
| GO:0043406           | positive regulation of MAP kinase activity             | 7.65x10 <sup>-3</sup>  |
| REACTOME             | Reactome_cell_death_signalling_via_nrage_nrif_and_nade | 7.67x10 <sup>-3</sup>  |
| MP:0000180           | abnormal circulating cholesterol level                 | 7.71x10 <sup>-3</sup>  |
| ENSG00000170759      | KIF5B PPI subnetwork                                   | 7.79x10 <sup>-3</sup>  |
| ENSG00000180530      | NRIP1 PPI subnetwork                                   | 7.86x10 <sup>-3</sup>  |
| ENSG00000138771      | SHROOM3 PPI subnetwork                                 | 7.89x10 <sup>-3</sup>  |
| ENSG00000065882      | TBC1D1 PPI subnetwork                                  | 7.97x10 <sup>-3</sup>  |
| ENSG00000138592      | USP8 PPI subnetwork                                    | 7.99x10 <sup>-3</sup>  |
| MP:0001915           | intracranial hemorrhage                                | 8.00x10 <sup>-3</sup>  |
| ENSG00000131746      | TNS4 PPI subnetwork                                    | 8.01x10 <sup>-3</sup>  |
| MP:0004883           | abnormal vascular wound healing                        | 8.15x10 <sup>-3</sup>  |
| ENSG00000091073      | ENSG00000091073 PPI subnetwork                         | 8.22x10 <sup>-3</sup>  |
| ENSG00000081189      | MEF2C PPI subnetwork                                   | 8.24x10 <sup>-3</sup>  |
| ENSG00000154415      | PPP1R3A PPI subnetwork                                 | 8.33x10 <sup>-3</sup>  |
| ENSG00000188313      | PLSCR1 PPI subnetwork                                  | 8.55x10 <sup>-3</sup>  |
| MP:0004933           | abnormal epididymis epithelium morphology              | 8.61x10 <sup>-3</sup>  |
| ENSG00000147065      | MSN PPI subnetwork                                     | 8.64x10 <sup>-3</sup>  |
| ENSG00000165409      | TSHR PPI subnetwork                                    | 8.64x10 <sup>-3</sup>  |
| ENSG00000106992      | AK1 PPI subnetwork                                     | 8.69x10 <sup>-3</sup>  |
| GO:0007292           | female gamete generation                               | 8.93x10 <sup>-3</sup>  |
| ENSG00000144061      | NPHP1 PPI subnetwork                                   | 8.95x10 <sup>-3</sup>  |
| MP:0003419           | delayed endochondral bone ossification                 | 8.98x10 <sup>-3</sup>  |
| ENSG00000110880      | CORO1C PPI subnetwork                                  | 9.04x10 <sup>-3</sup>  |
| ENSG00000197879      | MYO1C PPI subnetwork                                   | 9.22x10 <sup>-3</sup>  |
| ENSG00000176476      | CCDC101 PPI subnetwork                                 | 9.31x10 <sup>-3</sup>  |
| ENSG00000176108      | CHMP6 PPI subnetwork                                   | 9.44x10 <sup>-3</sup>  |
| REACTOME             | Reactome_integrin_cell_surface_interactions            | 9.47x10 <sup>-3</sup>  |
| GO:0016758           | transferase activity, transferring hexosyl groups      | 9.49x10 <sup>-3</sup>  |
| ENSG00000103197      | TSC2 PPI subnetwork                                    | 9.49x10 <sup>-3</sup>  |
| MP:0003909           | increased eating behavior                              | 9.57x10 <sup>-3</sup>  |
| MP:0000716           | abnormal immune system cell morphology                 | 9.63x10 <sup>-3</sup>  |
| MP:0008803           | abnormal placental labyrinth vasculature morphology    | 9.67x10 <sup>-3</sup>  |
| ENSG00000137801      | THBS1 PPI subnetwork                                   | 9.71x10 <sup>-3</sup>  |
| ENSG00000130522      | JUND PPI subnetwork                                    | 9.72x10 <sup>-3</sup>  |
| GO:0005088           | Ras guanyl-nucleotide exchange factor activity         | 9.78x10 <sup>-3</sup>  |
| ENSG00000170581      | STAT2 PPI subnetwork                                   | 9.79x10 <sup>-3</sup>  |
| ENSG00000173757      | STAT5B PPI subnetwork                                  | 9.84x10 <sup>-3</sup>  |
| GO:0043277           | apoptotic cell clearance                               | 9.98x10 <sup>-3</sup>  |
| GO:0006917           | induction of apoptosis                                 | 0.01                   |
| MP:0001828           | abnormal T cell activation                             | 0.01                   |
| ENSG00000171241      | SHCBP1 PPI subnetwork                                  | 0.01                   |
| REACTOME             | REACTOME_apoptosis                                     | 0.01                   |
| MP:0011106           | partial embryonic lethality before somite formation    | 0.01                   |
| GO:0030169           | low-density lipoprotein particle binding               | 0.01                   |
| MP:0003731           | abnormal retinal outer nuclear layer morphology        | 0.01                   |
| MP:0009400           | decreased skeletal muscle fiber size                   | 0.01                   |
| ENSG00000137693      | YAP1 PPI subnetwork                                    | 0.01                   |

| Original gene set ID | Original gene set description                              | DEPCT Nominal P-value |
|----------------------|------------------------------------------------------------|-----------------------|
| REACTOME             | Reactome_nrage_signals_death_through_jnk                   | 0.01                  |
| ENSG00000145794      | MEGF10 PPI subnetwork                                      | 0.01                  |
| MP:0008478           | increased spleen white pulp amount                         | 0.01                  |
| MP:0005079           | defective cytotoxic T cell cytolysis                       | 0.01                  |
| ENSG00000141506      | PIK3R5 PPI subnetwork                                      | 0.01                  |
| GO:0000989           | transcription factor binding transcription factor activity | 0.01                  |
| MP:0002161           | abnormal fertility/fecundity                               | 0.01                  |
| GO:0040029           | regulation of gene expression, epigenetic                  | 0.01                  |
| ENSG00000115963      | RND3 PPI subnetwork                                        | 0.01                  |
| GO:0043236           | laminin binding                                            | 0.01                  |
| ENSG00000211660      | ENSG00000211660 PPI subnetwork                             | 0.01                  |
| ENSG00000211653      | ENSG00000211653 PPI subnetwork                             | 0.01                  |
| ENSG00000160310      | PRMT2 PPI subnetwork                                       | 0.01                  |
| ENSG00000127688      | GAN PPI subnetwork                                         | 0.01                  |
| ENSG00000167711      | SERPINF2 PPI subnetwork                                    | 0.01                  |
| GO:0043491           | protein kinase B signaling cascade                         | 0.01                  |
| ENSG00000136068      | FLNB PPI subnetwork                                        | 0.01                  |
| GO:0002020           | protease binding                                           | 0.01                  |
| ENSG00000198053      | SIRPA PPI subnetwork                                       | 0.01                  |
| ENSG00000182319      | SGK223 PPI subnetwork                                      | 0.01                  |
| ENSG00000174292      | TNK1 PPI subnetwork                                        | 0.01                  |
| ENSG00000132825      | PPP1R3D PPI subnetwork                                     | 0.01                  |
| GO:0051015           | actin filament binding                                     | 0.01                  |
| ENSG00000140443      | IGF1R PPI subnetwork                                       | 0.01                  |
| MP:0000281           | abnormal interventricular septum morphology                | 0.01                  |
| ENSG00000067560      | RHOA PPI subnetwork                                        | 0.01                  |
| MP:0006094           | increased fat cell size                                    | 0.01                  |
| ENSG00000197555      | SIPA1L1 PPI subnetwork                                     | 0.01                  |
| ENSG00000183386      | FHL3 PPI subnetwork                                        | 0.01                  |
| MP:0003229           | abnormal vitelline vasculature morphology                  | 0.01                  |
| MP:0001231           | abnormal epidermis stratum basale morphology               | 0.01                  |
| MP:0000511           | abnormal intestinal mucosa morphology                      | 0.01                  |
| KEGG                 | KEGG_ACUTE_MYELOID_LEUKEMIA                                | 0.01                  |
| GO:0007254           | JNK cascade                                                | 0.01                  |
| GO:0008624           | induction of apoptosis by extracellular signals            | 0.01                  |
| GO:0000988           | protein binding transcription factor activity              | 0.02                  |
| MP:0002452           | abnormal antigen presenting cell physiology                | 0.02                  |
| ENSG00000185950      | IRS2 PPI subnetwork                                        | 0.02                  |
| KEGG                 | KEGG_leukocyte_transendothelial_migration                  | 0.02                  |
| GO:0051568           | histone H3-K4 methylation                                  | 0.02                  |
| ENSG00000165516      | KLHDC2 PPI subnetwork                                      | 0.02                  |
| REACTOME             | Reactome_cell_surface_interactions_at_the_vascular_wall    | 0.02                  |
| ENSG00000198838      | RYR3 PPI subnetwork                                        | 0.02                  |
| MP:0001711           | abnormal placenta morphology                               | 0.02                  |
| GO:0014910           | regulation of smooth muscle cell migration                 | 0.02                  |
| ENSG00000104960      | PTOV1 PPI subnetwork                                       | 0.02                  |
| GO:0001968           | fibronectin binding                                        | 0.02                  |

| Original gene set ID | Original gene set description             | DEPCT Nominal P-value |
|----------------------|-------------------------------------------|-----------------------|
| GO:0012502           | induction of programmed cell death        | 0.02                  |
| ENSG00000100364      | KIAA0930 PPI subnetwork                   | 0.02                  |
| ENSG00000165410      | CFL2 PPI subnetwork                       | 0.02                  |
| MP:0004994           | abnormal brain wave pattern               | 0.02                  |
| MP:0001552           | increased circulating triglyceride level  | 0.02                  |
| ENSG00000116141      | MARK1 PPI subnetwork                      | 0.02                  |
| GO:0032403           | protein complex binding                   | 0.02                  |
| ENSG00000179364      | PACS2 PPI subnetwork                      | 0.02                  |
| MP:0001559           | hyperglycemia                             | 0.02                  |
| ENSG00000105851      | PIK3CG PPI subnetwork                     | 0.02                  |
| MP:0004031           | insulinitis                               | 0.02                  |
| MP:0010124           | decreased bone mineral content            | 0.02                  |
| ENSG00000165197      | FIGF PPI subnetwork                       | 0.02                  |
| ENSG00000126561      | STAT5A PPI subnetwork                     | 0.02                  |
| ENSG00000136156      | ITM2B PPI subnetwork                      | 0.02                  |
| ENSG00000164327      | RICTOR PPI subnetwork                     | 0.02                  |
| ENSG00000159166      | LAD1 PPI subnetwork                       | 0.02                  |
| MP:0001716           | abnormal placenta labyrinth morphology    | 0.02                  |
| MP:0002427           | disproportionate dwarf                    | 0.02                  |
| ENSG00000105371      | ICAM4 PPI subnetwork                      | 0.02                  |
| ENSG00000165476      | REEP3 PPI subnetwork                      | 0.02                  |
| GO:0046625           | sphingolipid binding                      | 0.02                  |
| MP:0000585           | kinked tail                               | 0.02                  |
| MP:0000889           | abnormal cerebellar molecular layer       | 0.02                  |
| ENSG00000105699      | LSR PPI subnetwork                        | 0.02                  |
| GO:0005545           | 1-phosphatidylinositol binding            | 0.02                  |
| MP:0001134           | absent corpus luteum                      | 0.02                  |
| ENSG00000100097      | LGALS1 PPI subnetwork                     | 0.02                  |
| MP:0002079           | increased circulating insulin level       | 0.02                  |
| ENSG00000150093      | ITGB1 PPI subnetwork                      | 0.02                  |
| GO:0001871           | pattern binding                           | 0.02                  |
| GO:0030247           | polysaccharide binding                    | 0.02                  |
| ENSG00000126934      | MAP2K2 PPI subnetwork                     | 0.02                  |
| ENSG00000110395      | CBL PPI subnetwork                        | 0.02                  |
| ENSG00000179151      | EDC3 PPI subnetwork                       | 0.02                  |
| ENSG00000154162      | CDH12 PPI subnetwork                      | 0.02                  |
| ENSG00000184363      | PKP3 PPI subnetwork                       | 0.02                  |
| ENSG00000020577      | SAMD4A PPI subnetwork                     | 0.02                  |
| MP:0004139           | abnormal gastric parietal cell morphology | 0.02                  |
| ENSG00000168476      | REEP4 PPI subnetwork                      | 0.02                  |
| ENSG00000110651      | CD81 PPI subnetwork                       | 0.02                  |
| ENSG00000134184      | GSTM1 PPI subnetwork                      | 0.02                  |
| ENSG00000105376      | ICAM5 PPI subnetwork                      | 0.02                  |
| ENSG00000196954      | CASP4 PPI subnetwork                      | 0.02                  |
| MP:0003704           | abnormal hair follicle development        | 0.02                  |
| ENSG00000050820      | BCAR1 PPI subnetwork                      | 0.02                  |
| ENSG00000151748      | SAV1 PPI subnetwork                       | 0.02                  |

| Original gene set ID | Original gene set description              | DEPICT Nominal P-value |
|----------------------|--------------------------------------------|------------------------|
| GO:0003714           | transcription corepressor activity         | 0.02                   |
| ENSG00000115904      | SOS1 PPI subnetwork                        | 0.02                   |
| ENSG00000175793      | SFN PPI subnetwork                         | 0.02                   |
| ENSG00000100345      | MYH9 PPI subnetwork                        | 0.02                   |
| GO:0035091           | phosphatidylinositol binding               | 0.02                   |
| ENSG00000149930      | TAOK2 PPI subnetwork                       | 0.02                   |
| GO:0042054           | histone methyltransferase activity         | 0.02                   |
| MP:0000689           | abnormal spleen morphology                 | 0.02                   |
| GO:0001892           | embryonic placenta development             | 0.02                   |
| ENSG00000130294      | KIF1A PPI subnetwork                       | 0.02                   |
| ENSG00000148965      | SAA4 PPI subnetwork                        | 0.02                   |
| GO:0034774           | secretory granule lumen                    | 0.02                   |
| ENSG00000166483      | WEE1 PPI subnetwork                        | 0.02                   |
| ENSG00000110237      | ARHGEF17 PPI subnetwork                    | 0.02                   |
| GO:0032608           | interferon-beta production                 | 0.02                   |
| ENSG00000152518      | ZFP36L2 PPI subnetwork                     | 0.02                   |
| MP:0010792           | abnormal stomach mucosa morphology         | 0.02                   |
| ENSG00000189319      | FAM53B PPI subnetwork                      | 0.02                   |
| ENSG00000117461      | PIK3R3 PPI subnetwork                      | 0.02                   |
| GO:0034362           | low-density lipoprotein particle           | 0.02                   |
| ENSG00000134072      | CAMK1 PPI subnetwork                       | 0.02                   |
| ENSG00000163362      | C1orf106 PPI subnetwork                    | 0.02                   |
| MP:0002816           | colitis                                    | 0.02                   |
| GO:0050900           | leukocyte migration                        | 0.03                   |
| GO:0044304           | main axon                                  | 0.03                   |
| ENSG00000071909      | MYO3B PPI subnetwork                       | 0.03                   |
| ENSG00000100714      | MTHFD1 PPI subnetwork                      | 0.03                   |
| ENSG00000198836      | OPA1 PPI subnetwork                        | 0.03                   |
| ENSG00000197442      | MAP3K5 PPI subnetwork                      | 0.03                   |
| ENSG00000206306      | HLA-DRB1 PPI subnetwork                    | 0.03                   |
| ENSG00000206240      | HLA-DRB1 PPI subnetwork                    | 0.03                   |
| GO:0031983           | vesicle lumen                              | 0.03                   |
| KEGG                 | KEGG_regulation_of_actin_cytoskeleton      | 0.03                   |
| GO:0004713           | protein tyrosine kinase activity           | 0.03                   |
| GO:0006953           | acute-phase response                       | 0.03                   |
| GO:0003712           | transcription cofactor activity            | 0.03                   |
| MP:0000295           | trabecula carnea hypoplasia                | 0.03                   |
| ENSG00000105647      | PIK3R2 PPI subnetwork                      | 0.03                   |
| GO:0060205           | cytoplasmic membrane-bounded vesicle lumen | 0.03                   |
| ENSG00000107566      | ERLIN1 PPI subnetwork                      | 0.03                   |
| ENSG00000114270      | COL7A1 PPI subnetwork                      | 0.03                   |
| ENSG00000135930      | EIF4E2 PPI subnetwork                      | 0.03                   |
| MP:0006413           | increased T cell apoptosis                 | 0.03                   |
| ENSG00000211949      | ENSG00000211949 PPI subnetwork             | 0.03                   |
| ENSG00000125731      | SH2D3A PPI subnetwork                      | 0.03                   |
| MP:0000414           | alopecia                                   | 0.03                   |
| ENSG00000160691      | SHC1 PPI subnetwork                        | 0.03                   |

| Original gene set ID | Original gene set description                                                    | DEPCT Nominal P-value |
|----------------------|----------------------------------------------------------------------------------|-----------------------|
| MP:0001282           | short vibrissae                                                                  | 0.03                  |
| MP:0003996           | clonic seizures                                                                  | 0.03                  |
| ENSG00000019991      | HGF PPI subnetwork                                                               | 0.03                  |
| MP:0010025           | decreased total body fat amount                                                  | 0.03                  |
| GO:0007568           | aging                                                                            | 0.03                  |
| GO:0042809           | vitamin D receptor binding                                                       | 0.03                  |
| MP:0005331           | insulin resistance                                                               | 0.03                  |
| GO:0045682           | regulation of epidermis development                                              | 0.03                  |
| MP:0001923           | reduced female fertility                                                         | 0.03                  |
| MP:0001219           | thick epidermis                                                                  | 0.03                  |
| ENSG00000068615      | REEP1 PPI subnetwork                                                             | 0.03                  |
| ENSG00000171219      | CDC42BPG PPI subnetwork                                                          | 0.03                  |
| MP:0009583           | increased keratinocyte proliferation                                             | 0.03                  |
| ENSG00000105810      | CDK6 PPI subnetwork                                                              | 0.03                  |
| ENSG00000105662      | CRTC1 PPI subnetwork                                                             | 0.03                  |
| MP:0003957           | abnormal nitric oxide homeostasis                                                | 0.03                  |
| KEGG                 | KEGG_small_cell_lung_cancer                                                      | 0.03                  |
| GO:0030669           | clathrin-coated endocytic vesicle membrane                                       | 0.03                  |
| ENSG00000100030      | MAPK1 PPI subnetwork                                                             | 0.03                  |
| GO:0046328           | regulation of JNK cascade                                                        | 0.03                  |
| GO:0014070           | response to organic cyclic compound                                              | 0.03                  |
| GO:0033500           | carbohydrate homeostasis                                                         | 0.03                  |
| GO:0042593           | glucose homeostasis                                                              | 0.03                  |
| REACTOME             | Reactome_ptm_gamma_carboxylation_hypusine_formation_and_arylsulfatase_activation | 0.03                  |
| REACTOME             | Reactome_regulation_of_signaling_by_cbl                                          | 0.03                  |
| MP:0002418           | increased susceptibility to viral infection                                      | 0.03                  |
| MP:0003721           | increased tumor growth/size                                                      | 0.03                  |
| GO:0071845           | cellular component disassembly at cellular level                                 | 0.03                  |
| GO:0030518           | intracellular steroid hormone receptor signaling pathway                         | 0.03                  |
| ENSG00000116824      | CD2 PPI subnetwork                                                               | 0.03                  |
| MP:0003566           | abnormal cell adhesion                                                           | 0.03                  |
| GO:0034061           | DNA polymerase activity                                                          | 0.03                  |
| ENSG00000141968      | VAV1 PPI subnetwork                                                              | 0.03                  |
| GO:0001701           | in utero embryonic development                                                   | 0.03                  |
| MP:0000166           | abnormal chondrocyte morphology                                                  | 0.03                  |
| MP:0003400           | kinked neural tube                                                               | 0.03                  |
| GO:0000790           | nuclear chromatin                                                                | 0.03                  |
| ENSG00000197102      | DYNC1H1 PPI subnetwork                                                           | 0.03                  |
| GO:0043566           | structure-specific DNA binding                                                   | 0.03                  |
| ENSG00000075413      | MARK3 PPI subnetwork                                                             | 0.03                  |
| GO:0000271           | polysaccharide biosynthetic process                                              | 0.03                  |
| REACTOME             | Reactome_cell:cell_communication                                                 | 0.03                  |
| MP:0000410           | waved hair                                                                       | 0.03                  |
| ENSG00000154556      | SORBS2 PPI subnetwork                                                            | 0.03                  |
| ENSG00000104368      | PLAT PPI subnetwork                                                              | 0.03                  |
| GO:0043123           | positive regulation of I-kappaB kinase/NF-kappaB cascade                         | 0.03                  |
| ENSG00000156127      | BATF PPI subnetwork                                                              | 0.03                  |

| Original gene set ID | Original gene set description                               | DEPICK Nominal P-value |
|----------------------|-------------------------------------------------------------|------------------------|
| ENSG00000132470      | ITGB4 PPI subnetwork                                        | 0.03                   |
| GO:0038024           | cargo receptor activity                                     | 0.03                   |
| ENSG00000100014      | SPECC1L PPI subnetwork                                      | 0.03                   |
| ENSG00000163083      | INHBB PPI subnetwork                                        | 0.03                   |
| ENSG00000110931      | CAMKK2 PPI subnetwork                                       | 0.03                   |
| MP:0002088           | abnormal embryonic growth/weight/body size                  | 0.03                   |
| GO:0016571           | histone methylation                                         | 0.03                   |
| GO:0033559           | unsaturated fatty acid metabolic process                    | 0.03                   |
| MP:0005350           | increased susceptibility to autoimmune disorder             | 0.03                   |
| ENSG00000136111      | TBC1D4 PPI subnetwork                                       | 0.03                   |
| REACTOME             | Reactome_nephrin_interactions                               | 0.03                   |
| ENSG00000182195      | LDOC1 PPI subnetwork                                        | 0.03                   |
| ENSG00000123685      | BATF3 PPI subnetwork                                        | 0.03                   |
| ENSG00000215699      | ENSG00000215699 PPI subnetwork                              | 0.03                   |
| GO:0005720           | nuclear heterochromatin                                     | 0.03                   |
| ENSG00000092969      | TGFB2 PPI subnetwork                                        | 0.03                   |
| KEGG                 | KEGG_ECM_receptor_interaction                               | 0.03                   |
| MP:0001201           | translucent skin                                            | 0.03                   |
| GO:0016278           | lysine N-methyltransferase activity                         | 0.03                   |
| GO:0016279           | protein-lysine N-methyltransferase activity                 | 0.03                   |
| ENSG00000196586      | MYO6 PPI subnetwork                                         | 0.03                   |
| GO:0004702           | receptor signaling protein serine/threonine kinase activity | 0.03                   |
| ENSG00000072518      | MARK2 PPI subnetwork                                        | 0.03                   |
| ENSG00000165025      | SYK PPI subnetwork                                          | 0.03                   |
| MP:0002109           | abnormal limb morphology                                    | 0.03                   |
| ENSG00000157764      | BRAF PPI subnetwork                                         | 0.03                   |
| ENSG00000152256      | PDK1 PPI subnetwork                                         | 0.03                   |
| ENSG00000065618      | COL17A1 PPI subnetwork                                      | 0.04                   |
| ENSG00000169220      | RGS14 PPI subnetwork                                        | 0.04                   |
| ENSG00000100311      | PDGFB PPI subnetwork                                        | 0.04                   |
| ENSG00000134202      | GSTM3 PPI subnetwork                                        | 0.04                   |
| ENSG00000142515      | KLK3 PPI subnetwork                                         | 0.04                   |
| MP:0002619           | abnormal lymphocyte morphology                              | 0.04                   |
| ENSG00000161395      | PGAP3 PPI subnetwork                                        | 0.04                   |
| ENSG00000145431      | PDGFC PPI subnetwork                                        | 0.04                   |
| ENSG00000170962      | PDGFD PPI subnetwork                                        | 0.04                   |
| ENSG00000153879      | CEBPG PPI subnetwork                                        | 0.04                   |
| ENSG00000077380      | DYNC1I2 PPI subnetwork                                      | 0.04                   |
| ENSG00000197122      | SRC PPI subnetwork                                          | 0.04                   |
| MP:0004399           | abnormal cochlear outer hair cell morphology                | 0.04                   |
| ENSG00000174996      | KLC2 PPI subnetwork                                         | 0.04                   |
| MP:0002376           | abnormal dendritic cell physiology                          | 0.04                   |
| MP:0000709           | enlarged thymus                                             | 0.04                   |
| MP:0008706           | decreased interleukin-6 secretion                           | 0.04                   |
| MP:0004686           | decreased length of long bones                              | 0.04                   |
| GO:0050810           | regulation of steroid biosynthetic process                  | 0.04                   |
| ENSG00000138396      | ENSG00000138396 PPI subnetwork                              | 0.04                   |

| Original gene set ID | Original gene set description               | DEPICT Nominal P-value |
|----------------------|---------------------------------------------|------------------------|
| ENSG00000148400      | NOTCH1 PPI subnetwork                       | 0.04                   |
| ENSG00000137171      | KLC4 PPI subnetwork                         | 0.04                   |
| ENSG00000196396      | PTPN1 PPI subnetwork                        | 0.04                   |
| ENSG00000148672      | GLUD1 PPI subnetwork                        | 0.04                   |
| GO:0000975           | regulatory region DNA binding               | 0.04                   |
| GO:0001067           | regulatory region nucleic acid binding      | 0.04                   |
| GO:0022411           | cellular component disassembly              | 0.04                   |
| ENSG00000026025      | VIM PPI subnetwork                          | 0.04                   |
| ENSG00000061273      | HDAC7 PPI subnetwork                        | 0.04                   |
| ENSG00000104067      | TJP1 PPI subnetwork                         | 0.04                   |
| MP:0004813           | absent linear vestibular evoked potential   | 0.04                   |
| ENSG00000091136      | LAMB1 PPI subnetwork                        | 0.04                   |
| KEGG                 | KEGG_renal_cell_carcinoma                   | 0.04                   |
| KEGG                 | KEGG_focal_adhesion                         | 0.04                   |
| GO:0031581           | hemidesmosome assembly                      | 0.04                   |
| ENSG00000141068      | KSR1 PPI subnetwork                         | 0.04                   |
| MP:0004214           | abnormal long bone diaphysis morphology     | 0.04                   |
| ENSG00000123836      | PFKFB2 PPI subnetwork                       | 0.04                   |
| ENSG00000168090      | COPS6 PPI subnetwork                        | 0.04                   |
| ENSG00000132356      | PRKAA1 PPI subnetwork                       | 0.04                   |
| GO:0031093           | platelet alpha granule lumen                | 0.04                   |
| GO:0048545           | response to steroid hormone stimulus        | 0.04                   |
| MP:0003109           | short femur                                 | 0.04                   |
| ENSG00000113758      | DBN1 PPI subnetwork                         | 0.04                   |
| GO:0008276           | protein methyltransferase activity          | 0.04                   |
| MP:0003383           | abnormal gluconeogenesis                    | 0.04                   |
| ENSG00000162614      | NEXN PPI subnetwork                         | 0.04                   |
| ENSG00000162614      | NEXN PPI subnetwork                         | 0.04                   |
| ENSG00000169641      | LUZP1 PPI subnetwork                        | 0.04                   |
| MP:0002152           | abnormal brain morphology                   | 0.04                   |
| ENSG00000204257      | HLA-DMA PPI subnetwork                      | 0.04                   |
| ENSG00000206229      | ENSG00000206229 PPI subnetwork              | 0.04                   |
| ENSG00000206293      | ENSG00000206293 PPI subnetwork              | 0.04                   |
| ENSG00000138439      | FAM117B PPI subnetwork                      | 0.04                   |
| GO:0006636           | unsaturated fatty acid biosynthetic process | 0.04                   |
| ENSG00000176444      | CLK2 PPI subnetwork                         | 0.04                   |
| MP:0000703           | abnormal thymus morphology                  | 0.04                   |
| REACTOME             | Reactome_zinc_transporters                  | 0.04                   |
| ENSG00000125952      | MAX PPI subnetwork                          | 0.04                   |
| GO:0046456           | icosanoid biosynthetic process              | 0.04                   |
| ENSG00000132964      | CDK8 PPI subnetwork                         | 0.04                   |
| MP:0008688           | decreased interleukin-2 secretion           | 0.04                   |
| ENSG00000196218      | RYR1 PPI subnetwork                         | 0.04                   |
| MP:0004770           | abnormal synaptic vesicle recycling         | 0.04                   |
| ENSG00000121879      | PIK3CA PPI subnetwork                       | 0.04                   |
| ENSG00000196735      | HLA-DQA1 PPI subnetwork                     | 0.04                   |
| MP:0009355           | increased liver triglyceride level          | 0.04                   |

| Original gene set ID | Original gene set description                                        | DEPCT Nominal P-value |
|----------------------|----------------------------------------------------------------------|-----------------------|
| MP:0009399           | increased skeletal muscle fiber size                                 | 0.04                  |
| ENSG00000160678      | S100A1 PPI subnetwork                                                | 0.04                  |
| ENSG00000064999      | ANKS1A PPI subnetwork                                                | 0.04                  |
| ENSG00000173327      | MAP3K11 PPI subnetwork                                               | 0.04                  |
| GO:0051183           | vitamin transporter activity                                         | 0.04                  |
| GO:0006690           | icosanoid metabolic process                                          | 0.04                  |
| ENSG00000134363      | FST PPI subnetwork                                                   | 0.04                  |
| GO:0060053           | neurofilament cytoskeleton                                           | 0.04                  |
| ENSG00000151914      | DST PPI subnetwork                                                   | 0.04                  |
| ENSG00000189079      | ARID2 PPI subnetwork                                                 | 0.04                  |
| ENSG00000065559      | MAP2K4 PPI subnetwork                                                | 0.05                  |
| ENSG00000120709      | FAM53C PPI subnetwork                                                | 0.05                  |
| MP:0002110           | abnormal digit morphology                                            | 0.05                  |
| GO:0005976           | polysaccharide metabolic process                                     | 0.05                  |
| ENSG00000054523      | KIF1B PPI subnetwork                                                 | 0.05                  |
| ENSG00000100906      | NFKBIA PPI subnetwork                                                | 0.05                  |
| ENSG00000136518      | ACTL6A PPI subnetwork                                                | 0.05                  |
| GO:0004709           | MAP kinase kinase kinase activity                                    | 0.05                  |
| GO:0060711           | labyrinthine layer development                                       | 0.05                  |
| KEGG_                | KEGG_circadian_rhythm_mammal                                         | 0.05                  |
| REACTOME             | Reactome_classical_antibody-mediated_complement_activation           | 0.05                  |
| ENSG00000211979      | ENSG00000211979 PPI subnetwork                                       | 0.05                  |
| ENSG00000211973      | ENSG00000211973 PPI subnetwork                                       | 0.05                  |
| ENSG00000172534      | HCFC1 PPI subnetwork                                                 | 0.05                  |
| ENSG00000136270      | TBRG4 PPI subnetwork                                                 | 0.05                  |
| GO:0032648           | regulation of interferon-beta production                             | 0.05                  |
| GO:0034375           | high-density lipoprotein particle remodeling                         | 0.05                  |
| ENSG00000185811      | IKZF1 PPI subnetwork                                                 | 0.05                  |
| ENSG00000198802      | ENSG00000198802 PPI subnetwork                                       | 0.05                  |
| MP:0006262           | testis tumor                                                         | 0.05                  |
| ENSG00000171992      | SYNPO PPI subnetwork                                                 | 0.05                  |
| ENSG00000213341      | CHUK PPI subnetwork                                                  | 0.05                  |
| ENSG00000175197      | DDIT3 PPI subnetwork                                                 | 0.05                  |
| MP:0005150           | cachexia                                                             | 0.05                  |
| GO:0043122           | regulation of I-kappaB kinase/NF-kappaB cascade                      | 0.05                  |
| GO:0097006           | regulation of plasma lipoprotein particle levels                     | 0.05                  |
| ENSG00000162772      | ATF3 PPI subnetwork                                                  | 0.05                  |
| GO:0000122           | negative regulation of transcription from RNA polymerase II promoter | 0.05                  |
| GO:0005858           | axonemal dynein complex                                              | 0.05                  |
| ENSG00000051382      | PIK3CB PPI subnetwork                                                | 0.05                  |
| GO:0043405           | regulation of MAP kinase activity                                    | 0.05                  |
| MP:0008722           | abnormal chemokine secretion                                         | 0.05                  |
| KEGG                 | KEGG_chronic_myeloid_leukemia                                        | 0.05                  |
| REACTOME             | Reactome_regulated_PROTEOLYSIS_OF_P75NTR                             | 0.05                  |
| GO:0043588           | skin development                                                     | 0.05                  |
| GO:0010627           | regulation of intracellular protein kinase cascade                   | 0.05                  |
| GO:0044212           | transcription regulatory region DNA binding                          | 0.05                  |

| Original gene set ID | Original gene set description                                                           | DEPICK Nominal P-value |
|----------------------|-----------------------------------------------------------------------------------------|------------------------|
| GO:0030027           | lamellipodium                                                                           | 0.05                   |
| ENSG00000105976      | MET PPI subnetwork                                                                      | 0.05                   |
| MP:0002792           | abnormal retinal vasculature morphology                                                 | 0.05                   |
| MP:0000069           | kyphoscoliosis                                                                          | 0.05                   |
| GO:0034339           | regulation of transcription from RNA polymerase II promoter by nuclear hormone receptor | 0.05                   |
| ENSG00000141551      | CSNK1D PPI subnetwork                                                                   | 0.05                   |
| MP:0005108           | abnormal ulna morphology                                                                | 0.05                   |
| MP:0002419           | abnormal innate immunity                                                                | 0.05                   |
| GO:0016757           | transferase activity, transferring glycosyl groups                                      | 0.05                   |
| ENSG00000161800      | RACGAP1 PPI subnetwork                                                                  | 0.05                   |
| MP:0006387           | abnormal T cell number                                                                  | 0.05                   |
| GO:0005089           | Rho guanyl-nucleotide exchange factor activity                                          | 0.05                   |
| ENSG00000117984      | CTSD PPI subnetwork                                                                     | 0.05                   |
| ENSG00000105971      | CAV2 PPI subnetwork                                                                     | 0.05                   |
| ENSG00000115085      | ZAP70 PPI subnetwork                                                                    | 0.05                   |
| MP:0004609           | vertebral fusion                                                                        | 0.05                   |
| ENSG00000135862      | LAMC1 PPI subnetwork                                                                    | 0.05                   |
| MP:0003449           | abnormal intestinal goblet cell morphology                                              | 0.05                   |
| MP:0002687           | oligozoospermia                                                                         | 0.05                   |
| MP:0000714           | increased thymocyte number                                                              | 0.05                   |
| ENSG00000133030      | MPRIIP PPI subnetwork                                                                   | 0.05                   |
| ENSG00000079841      | RIMS1 PPI subnetwork                                                                    | 0.05                   |
| ENSG00000130638      | ATXN10 PPI subnetwork                                                                   | 0.05                   |
| MP:0002656           | abnormal keratinocyte differentiation                                                   | 0.05                   |
| ENSG00000129691      | ASH2L PPI subnetwork                                                                    | 0.05                   |
| MP:0002650           | abnormal ameloblast morphology                                                          | 0.05                   |
| ENSG00000135503      | ACVR1B PPI subnetwork                                                                   | 0.05                   |
| GO:0004715           | non-membrane spanning protein tyrosine kinase activity                                  | 0.05                   |
| ENSG00000001497      | LAS1L PPI subnetwork                                                                    | 0.05                   |
| GO:0018024           | histone-lysine N-methyltransferase activity                                             | 0.05                   |
| GO:0000792           | heterochromatin                                                                         | 0.05                   |
| ENSG00000111961      | SASH1 PPI subnetwork                                                                    | 0.05                   |
| MP:0008840           | abnormal spike wave discharge                                                           | 0.05                   |
| ENSG00000139514      | SLC7A1 PPI subnetwork                                                                   | 0.05                   |
| GO:0007249           | I-kappaB kinase/NF-kappaB cascade                                                       | 0.05                   |

## Functional effects of SNPs at AAA loci

### 1: Expression SNP database lookup (Online Table XIX)

Evidence for functional effects of AAA associated SNPs/loci was sought in two eQTL datasets curated by Andrew Johnson at the NIH National Heart Lung and Blood Institute, Framingham, USA. Firstly, index and proxy SNPs were queried in a collected database of expression SNP (eSNP) results. The collected eSNP results met criteria for statistical thresholds for association with gene transcript levels as described in the original papers. A general overview of a subset of >50 eQTL studies has been published<sup>109</sup>, with specific citations for >100 studies included in the current query following here:

Blood cell related eQTL studies included fresh lymphocytes<sup>110</sup>, fresh leukocytes<sup>111</sup>, leukocyte samples in individuals with Celiac disease<sup>112</sup>, whole blood samples<sup>113-126</sup>, lymphoblastoid cell lines (LCL) derived from asthmatic children<sup>127, 128</sup>, HapMap LCL from 3 populations<sup>129</sup>, a separate study on HapMap CEU LCL<sup>130</sup>, additional LCL population samples<sup>131-136</sup>, CD19<sup>+</sup> B cells<sup>137</sup>, primary PHA-stimulated T cells<sup>133, 135</sup>, CD4<sup>+</sup> T cells<sup>138</sup>, peripheral blood monocytes<sup>137, 139, 140</sup> and CD14<sup>+</sup> monocytes before and after stimulation with LPS or interferon-gamma<sup>141</sup>, CD11<sup>+</sup> dendritic cells before and after *Mycobacterium tuberculosis* infection<sup>142</sup> and a separate study of dendritic cells before or after stimulation with LPS, influenza or interferon-beta<sup>143</sup>. Micro-RNA QTLs<sup>144</sup> and DNase-I QTLs<sup>145</sup> were also queried for LCL.

Non-blood cell tissue eQTLs searched included omental and subcutaneous adipose<sup>115, 134, 146, 147</sup>, stomach<sup>147</sup>, endometrial carcinomas<sup>148</sup>, ER+ and ER- breast cancer tumor cells<sup>149</sup>, liver<sup>147, 150-153</sup>, osteoblasts<sup>154</sup>, intestine<sup>155</sup> and normal and cancerous colon<sup>156</sup>, skeletal muscle<sup>157</sup>, breast tissue (normal and cancer)<sup>158, 159</sup>, lung<sup>146, 160, 161</sup>, skin<sup>134, 146, 162</sup>, primary fibroblasts<sup>133, 135, 163</sup>, sputum<sup>164</sup>, pancreatic islet cells<sup>165</sup> and heart tissue from left ventricles<sup>146, 166</sup> and left and right atria<sup>167</sup>. Micro-RNA QTLs were also queried for gluteal and abdominal adipose<sup>168</sup> and liver<sup>169</sup>. Further mRNA and micro-RNA QTLs were queried from ER+ invasive breast cancer samples, colon-, kidney renal clear-, lung- and prostate-adenocarcinoma samples<sup>170</sup>.

Brain eQTL studies included brain cortex<sup>139, 171, 172</sup>, cerebellar cortex<sup>173</sup>, cerebellum<sup>172, 174-177</sup>, frontal cortex<sup>173, 175, 176</sup>, gliomas<sup>178</sup>, hippocampus<sup>173, 176</sup>, inferior olivary nucleus (from medulla)<sup>173</sup>, intralobular white matter<sup>173</sup>, occipital cortex<sup>173</sup>, parietal lobe<sup>174</sup>, pons<sup>175</sup>, pre-frontal cortex<sup>176, 177, 179, 180</sup>, putamen (at the level of anterior commissure)<sup>173</sup>, substantia nigra<sup>173</sup>, temporal cortex<sup>172, 173, 175, 176</sup>, thalamus<sup>176</sup> and visual cortex<sup>177</sup>.

Secondly, additional eQTL data were integrated from online sources including ScanDB, the Broad Institute GTex browser, and the Pritchard Lab (eqtl.uchicago.edu). Cerebellum, parietal lobe and liver eQTL data was downloaded from ScanDB and cis-eQTLs were limited to those with  $P < 1.0 \times 10^{-6}$  and trans-eQTLs with  $P < 5.0 \times 10^{-8}$ . The top 1000 eQTL results were downloaded from the GTex Browser at the Broad Institute for 9 tissues on 11/26/2013: thyroid, leg skin (sun exposed), tibial nerve, tibial artery, skeletal muscle, lung, heart (left ventricle), whole blood, and subcutaneous adipose<sup>146</sup>. All GTex results had associations with  $P < 8.4 \times 10^{-7}$ .

### 2: eQTL lookup in the Advanced Study of Aortic Pathology (Online Table XX and Online Figure III)

eQTL data were obtained from the Advanced Study of Aortic Pathology (ASAP) dataset which has previously been described<sup>181</sup>. Tissue samples were selected from individuals undergoing aortic valve surgery. Five tissue types were collected from each patient: mammary artery, liver, aorta intima-media, aorta adventitia, and heart. RNA was extracted from tissues and hybridised to Affymetrix ST 1.0 exon arrays (Santa Clara, CA, USA) and data were robust multiarray average normalised before log2 transformation. DNA extracted from whole blood was genotyped on the Illumina 610w-Quad

bead array (San Diego, CA, USA) platform. SNPs with >95% call rate were used for imputation, and imputed SNPs with quality scores of MACH <0.3 were excluded from analysis. An additive model for associations between SNPs and gene expression was assumed. Genotypes for 5 of the 10 lead SNPs at AAA risk loci were directly genotyped on Illumina 610wQuad arrays.

### **3: RNA-seq (Online Table XXI)**

RNA-seq data were obtained from the Stockholm-Tartu Atherosclerosis Reverse Network Engineering Task (STARNET) database<sup>182</sup> (<http://www.mountsinai.org/profiles/johan-bjorkegren>). These consist of RNA-seq data from 9 cardiovascular tissues from up to 600 CAD patients obtained during coronary artery by-pass grafting surgery. Gene expression was measured with a standard RNA-seq protocol, followed by normalization of raw read counts to adjust for library size and batch effects. Adjusted read counts were subsequently log<sub>2</sub>-transformed, and the association between genotype and expression was tested using a linear model. Permutation was used to assess the statistical significance. Significant results for the lead SNPs at each AAA risk locus are shown in **Online Table XX**.

### **4: Peripheral blood monocyte eQTL analysis (Online Table XXII)**

Data from an eQTL analysis of peripheral blood monocytes was obtained from the Cardiogenics Consortium<sup>183, 184</sup>. The description of the cohort sample collection and processing and the eQTL analysis have previously been described in detail. Briefly, genome-wide expression and genotype data were obtained from peripheral blood monocytes from 363 patients with CAD or myocardial infarction and 395 healthy individuals. Expression profiling was performed using the Illumina HumanRef-8 v3 beadchip array (Illumina Inc., San Diego, CA) containing 24,516 probes corresponding to 18,311 distinct genes and 21,793 Ref Seq annotated transcripts. Genome-wide genotyping was carried out using two Illumina arrays, the Sentrix Human Custom 1.2M array and the Human 610 Quad Custom array. SNP analysis was restricted to autosomal SNPs with MAF >0.01, call rate >0.95 and HWE testing  $P > 1 \times 10^{-5}$ . After quality control, 522,603 SNPs were used for association analyses with expression. All replicated AAA associated SNPs were tested for association with regional gene expression. Significant results are shown in **Online Table XXII**.



|          |            |                        |                                                      |           |           |       |                        |            |          |                        |
|----------|------------|------------------------|------------------------------------------------------|-----------|-----------|-------|------------------------|------------|----------|------------------------|
| 9p21     | rs10757274 | ANRIL                  | Visual cortex (all samples) [PMID 23622250]          | PSRC1     | rs646776  | 0.895 | 7.66x10 <sup>-11</sup> | rs646776   | 0.895    | 7.66x10 <sup>-11</sup> |
|          |            |                        | Visual cortex (Alzheimer's) [PMID 23622250]          | PSRC1     | rs646776  | 0.895 | 1.44x10 <sup>-09</sup> | rs646776   | 0.895    | 1.44x10 <sup>-09</sup> |
|          |            |                        | Whole blood (Battle) [PMID 24092820]                 | PSRC1     | rs599839  | 1     | 4.93x10 <sup>-87</sup> | rs599839   | 1        | 4.93x10 <sup>-87</sup> |
|          |            |                        | Whole blood (Schramm et al.) [PMID 24740359]         | PSRC1     | rs599839  | 1     | 1.23x10 <sup>-24</sup> | rs599839   | 1        | 1.23x10 <sup>-24</sup> |
|          |            |                        | Whole blood (Wright, n=4,647) [PMID 24728292]        | CELSR2    | rs629301  | 0.895 | 6.73x10 <sup>-18</sup> | rs629301   | 0.895    | 6.73x10 <sup>-18</sup> |
|          |            |                        | SubCutAdipose(Greenawalt) [PMID 21602305]            | CDKN2B    | rs1537370 | 0.901 | 1.48x10 <sup>-04</sup> | rs1537370  | Same SNP | 1.48x10 <sup>-04</sup> |
|          |            |                        | Omental adipose [PMID 21602305]                      | CDKN2B    | rs2383207 | 0.846 | 3.10x10 <sup>-07</sup> | rs2383207  | Same SNP | 3.10x10 <sup>-07</sup> |
|          |            |                        | CD14+ monocytes (2h LPS stimulated) [PMID 24604202]  | GGTA1     |           |       | 6.64x10 <sup>-04</sup> | rs10985349 | Same SNP | 6.64x10 <sup>-04</sup> |
|          |            |                        | Bcells (CD19+) [PMID 22446964]                       | PLTP      |           |       | 2.98x10 <sup>-09</sup> | rs394643   | 0.229    | 9.89x10 <sup>-40</sup> |
|          |            |                        | CD14+ monocytes (24h LPS stimulated) [PMID 24604202] | PLTP      |           |       | 2.46x10 <sup>-11</sup> | rs3827066  | Same SNP | 2.46x10 <sup>-11</sup> |
| 9q33.2   | rs10985349 | DAB2IP                 | CD14+ monocytes (24h LPS stimulated) [PMID 24604202] | DNTTIP1   |           |       | 8.41x10 <sup>-09</sup> | rs2664529  | 0.108    | 1.02x10 <sup>-63</sup> |
|          |            |                        | CD14+ monocytes (2h LPS stimulated) [PMID 24604202]  | PLTP      |           |       | 3.89x10 <sup>-11</sup> | rs3843763  | 0.506    | 2.46x10 <sup>-13</sup> |
| 20q13.12 | rs3827066  | Near PCIF1/MMP9/ZNF335 | CD14+ monocytes (2h LPS stimulated) [PMID 24604202]  | DNTTIP1   |           |       | 9.56x10 <sup>-10</sup> | rs2664529  | 0.108    | 1.60x10 <sup>-63</sup> |
|          |            |                        | CD14+ monocytes (IFNg stimulated) [PMID 24604202]    | PLTP      |           |       | 2.20x10 <sup>-43</sup> | rs3827066  | Same SNP | 2.20x10 <sup>-43</sup> |
|          |            |                        | CD14+ monocytes (IFNg stimulated) [PMID 24604202]    | DNTTIP1   |           |       | 2.68x10 <sup>-10</sup> | rs6032531  | 0.148    | 8.85x10 <sup>-76</sup> |
|          |            |                        | CD14+ monocytes (IFNg stimulated) [PMID 24604202]    | PLTP      |           |       | 8.25x10 <sup>-07</sup> | rs3827066  | Same SNP | 2.20x10 <sup>-43</sup> |
|          |            |                        | CD14+ monocytes (untreated) [PMID 24604202]          | DNTTIP1   |           |       | 3.69x10 <sup>-09</sup> | rs6032531  | 0.148    | 1.11x10 <sup>-49</sup> |
|          |            |                        | CD14+ monocytes (untreated) [PMID 24604202]          | CD40      |           |       | 4.03x10 <sup>-04</sup> | rs745307   | 0.086    | 4.24x10 <sup>-88</sup> |
|          |            |                        | LCL (MuTHER) [PMID 22941192]                         | PLTP      |           |       | 1.20x10 <sup>-06</sup> | rs441346   | 0.214    | 1.64x10 <sup>-37</sup> |
|          |            |                        | Liver(UCChicago) [PMID 21637794]                     | NEURL2    |           |       | 2.29x10 <sup>-06</sup> | rs3827066  | Same SNP | 2.29x10 <sup>-06</sup> |
|          |            |                        | Liver(UCChicago) [PMID 21637794]                     | C20orf165 | rs7270354 | 1     | 1.22x10 <sup>-03</sup> | rs7270354  | 1        | 1.22x10 <sup>-03</sup> |
|          |            |                        | Liver(UWash) [PMID 21637794]                         | NEURL2    |           |       | 1.02x10 <sup>-03</sup> | rs3827066  | Same SNP | 1.02x10 <sup>-03</sup> |
|          |            |                        | Peripheral artery plaque [PMID 24973796]             | NEURL2    | rs7270354 | 1     | 2.51x10 <sup>-08</sup> | rs7270354  | 1        | 2.51x10 <sup>-08</sup> |
|          |            |                        | Skin (MuTHER) [PMID 22941192]                        | WFDC3     |           |       | 2.60x10 <sup>-12</sup> | rs2664529  | 0.108    | 5.47x10 <sup>-74</sup> |
|          |            |                        | Subc adipose (MuTHER) [PMID 22941192]                | PLTP      |           |       | 6.67x10 <sup>-11</sup> | rs6104410  | 0.486    | 2.62x10 <sup>-11</sup> |
|          |            |                        | Subc adipose (MuTHER) [PMID 22941192]                | NEURL2    |           |       | 9.51x10 <sup>-09</sup> | rs3827066  | Same SNP | 9.51x10 <sup>-09</sup> |
|          |            |                        | Subc adipose (MuTHER) [PMID 22941192]                | WFDC3     |           |       | 1.26x10 <sup>-05</sup> | rs6032544  | 0.11     | 5.99x10 <sup>-36</sup> |
|          |            |                        | Whole blood (CHARGE) [PMID 24013639]                 | TNNC2     |           |       | 3.98x10 <sup>-19</sup> | rs6104350  | 0.11     | 3.33x10 <sup>-63</sup> |
|          |            |                        | Whole blood (CHARGE) [PMID 24013639]                 | DNTTIP1   |           |       | 2.52x10 <sup>-14</sup> | rs6104350  | 0.11     | 7.89x10 <sup>-71</sup> |
|          |            |                        |                                                      |           |           |       |                        |            |          |                        |
|          |            |                        |                                                      |           |           |       |                        |            |          |                        |
|          |            |                        |                                                      |           |           |       |                        |            |          |                        |



**Online Figure III:** Significant eQTL plots for data from ASAP study. Each column of plots represents data for the SNP and tissue stated at the bottom of each column. The gene for which expression has been assessed in each plot is shown to the left of each plot.

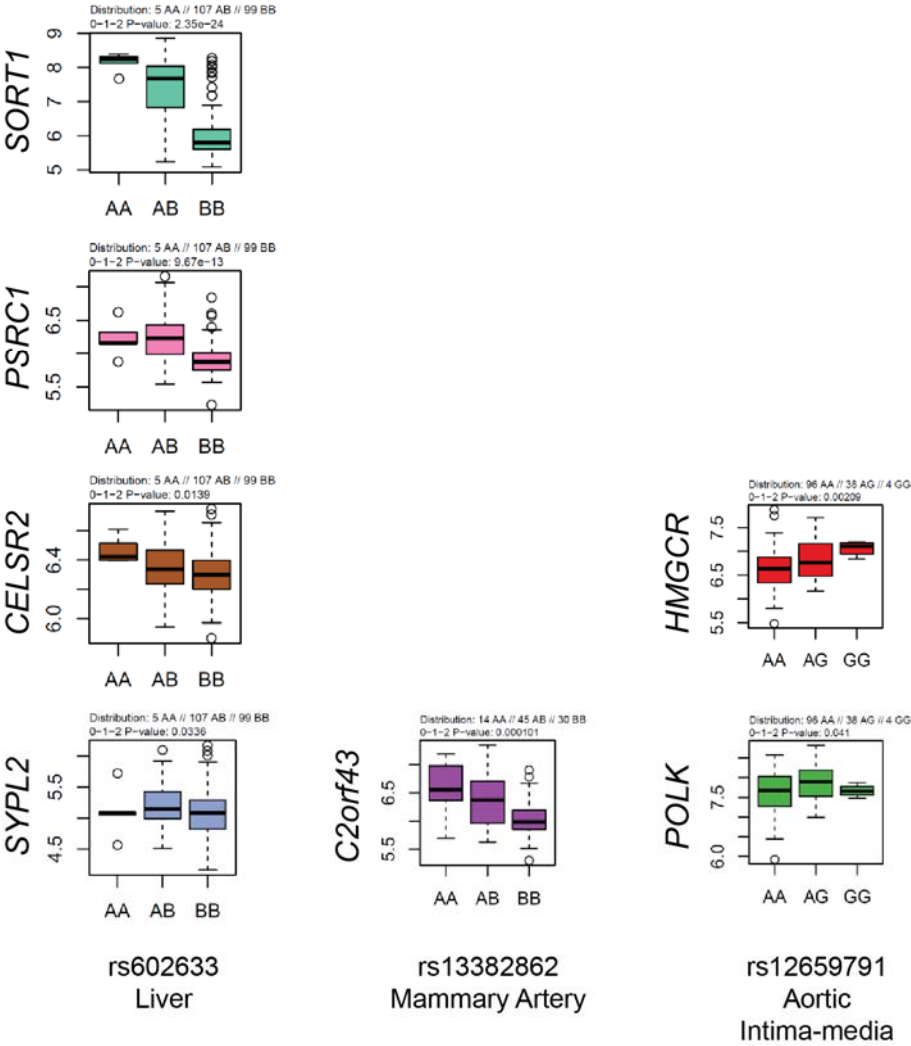

**Online Table XXI: eQTL results based on RNA seq data**

| Chr | Position  | SNP       | Locus    | Gene(s)                       | Tissue | gene for RNA-Seq | index SNP   | index SNP beta | index SNP P            | Lead SNP in region | Lead SNP beta | Lead SNP P              | index SNP effect independent |
|-----|-----------|-----------|----------|-------------------------------|--------|------------------|-------------|----------------|------------------------|--------------------|---------------|-------------------------|------------------------------|
| 1   | 109821511 | rs602633  | 1p13.3   | CELSR2/ <i>SORT1</i>          | Blood  | <i>PSRC1</i>     | rs602633    | 0.640465606    | 4.49x10 <sup>-17</sup> | rs629301           | 0.61412198    | 1.03x10 <sup>-15</sup>  | Yes                          |
|     |           |           |          |                               | LIV    | <i>PSRC1</i>     | rs602633    | -1.292449889   | 9.43x10 <sup>-10</sup> | rs7528419          | 1.26797503    | 4.33x10 <sup>-103</sup> | Yes                          |
|     |           |           |          |                               | LIV    | <i>SARS</i>      | rs602633    | 0.495537791    | 2.37x10 <sup>-12</sup> | rs1277930          | 0.49333558    | 2.97x10 <sup>-12</sup>  | Yes                          |
|     |           |           |          |                               | LIV    | <i>SORT1</i>     | rs602633    | -1.365654087   | 2.98x10 <sup>-13</sup> | rs7528419          | 1.33525433    | 1.79x10 <sup>-122</sup> | Yes                          |
|     |           |           |          |                               | LIV    | <i>CELSR2</i>    | rs602633    | 1.298741331    | 1.79x10 <sup>-10</sup> | rs629301           | 1.27447629    | 8.75x10 <sup>-105</sup> | Yes                          |
| 1   | 154426264 | rs4129267 | 1q21.3   | <i>IL6R</i>                   | MAM    | <i>IL6R</i>      | rs4129267   | 0.652344491    | 1.97x10 <sup>-26</sup> | rs7518199          | 0.63498045    | 3.78x10 <sup>-24</sup>  | Yes                          |
| 13  | 22861921  | rs9316871 | 13q12.11 | <i>LINC00540</i>              | MAM    | <i>FGF9</i>      | rs9316871   | -0.699526462   | 1.76x10 <sup>-23</sup> | rs9506822          | -0.7027035    | 2.44x10 <sup>-23</sup>  | Yes                          |
| 20  | 44586023  | rs3827066 | 20q13.12 | Near <i>PCIF1/MMP9/ZNF335</i> | AOR    | <i>PLTP</i>      | rs3827066   | -0.756619944   | 1.65x10 <sup>-21</sup> | rs7267295          | -0.7193854    | 5.40x10 <sup>-18</sup>  | Yes                          |
|     |           |           |          |                               | SF     | <i>PLTP</i>      | rs3827066   | -0.905646216   | 4.93x10 <sup>-29</sup> | rs7270354          | -0.8474133    | 2.10x10 <sup>-26</sup>  | Yes                          |
|     |           |           |          |                               | SKLM   | <i>PLTP</i>      | rs3827066   | -0.484882963   | 2.76x10 <sup>-29</sup> | rs7267295          | -0.4860579    | 1.40x10 <sup>-08</sup>  | Yes                          |
|     |           |           |          |                               | VAF    | <i>PLTP</i>      | rs3827066   | -0.610415837   | 1.39x10 <sup>-12</sup> | rs8124182          | -0.5513566    | 1.48x10 <sup>-10</sup>  | Yes                          |
|     |           |           |          |                               |        |                  |             |                |                        |                    |               |                         |                              |
| 21  | 39819830  | rs2836411 | 21q22.2  | <i>ERG</i>                    | MAM    | <i>ERG</i>       | rs386574671 | 0.271607451    | 1.88x10 <sup>-05</sup> | rs386574671        | 0.27160745    | 1.88x10 <sup>-05</sup>  | Yes                          |

**Online Table XXII: Peripheral blood monocyte eQTLs**

| Chr | Position  | SNP       | Locus    | Gene(s)                       | Probe_ID     | ILMN_Gene      | beta    | beta_se | P                      | FDR                    | Cell type  |
|-----|-----------|-----------|----------|-------------------------------|--------------|----------------|---------|---------|------------------------|------------------------|------------|
| 1   | 109821511 | rs602633  | 1p13.3   | CELSR2/ <i>SORT1</i>          | ILMN_1671843 | <i>PSRC1</i>   | -0.2202 | 0.0195  | 7.91x10 <sup>-27</sup> | 1.08x10 <sup>-23</sup> | Macrophage |
|     |           |           |          |                               | ILMN_2315964 | <i>PSRC1</i>   | -0.0763 | 0.0168  | 6.32x10 <sup>-06</sup> | 8.65x10 <sup>-04</sup> | Macrophage |
|     |           |           |          |                               | ILMN_1671843 | <i>PSRC1</i>   | -0.1512 | 0.0121  | 1.96x10 <sup>-32</sup> | 2.33x10 <sup>-29</sup> | Monocyte   |
|     |           |           |          |                               | ILMN_2315964 | <i>PSRC1</i>   | -0.1261 | 0.0158  | 4.72x10 <sup>-15</sup> | 1.83x10 <sup>-12</sup> | Monocyte   |
|     |           |           |          |                               | ILMN_1711208 | <i>CELSR2</i>  | -0.0696 | 0.0139  | 7.41x10 <sup>-07</sup> | 1.23x10 <sup>-04</sup> | Macrophage |
|     |           |           |          |                               | ILMN_1707077 | <i>SORT1</i>   | -0.0752 | 0.0183  | 4.38x10 <sup>-05</sup> | 4.95x10 <sup>-03</sup> | Macrophage |
|     |           |           |          |                               | ILMN_1671843 | <i>PSRC1</i>   | -0.2202 | 0.0195  | 7.91x10 <sup>-27</sup> | 1.08x10 <sup>-23</sup> | Macrophage |
|     |           |           |          |                               | ILMN_1711208 | <i>CELSR2</i>  | -0.0696 | 0.0139  | 7.41x10 <sup>-07</sup> | 1.23x10 <sup>-04</sup> | Macrophage |
|     |           |           |          |                               | ILMN_2315964 | <i>PSRC1</i>   | -0.0763 | 0.0168  | 6.32x10 <sup>-06</sup> | 8.65x10 <sup>-04</sup> | Macrophage |
|     |           |           |          |                               | ILMN_1707077 | <i>SORT1</i>   | -0.0752 | 0.0183  | 4.38x10 <sup>-05</sup> | 4.95x10 <sup>-03</sup> | Macrophage |
|     |           |           |          |                               | ILMN_1671843 | <i>PSRC1</i>   | -0.1512 | 0.0121  | 1.96x10 <sup>-32</sup> | 2.33x10 <sup>-29</sup> | Monocyte   |
|     |           |           |          |                               | ILMN_2315964 | <i>PSRC1</i>   | -0.1261 | 0.0158  | 4.72x10 <sup>-15</sup> | 1.83x10 <sup>-12</sup> | Monocyte   |
|     |           |           |          |                               |              |                |         |         |                        |                        |            |
| 20  | 44586023  | rs3827066 | 20q13.12 | Near <i>PCIF1/MMP9/ZNF335</i> | ILMN_1777113 | <i>NEURL2</i>  | -0.1058 | 0.0255  | 3.86x10 <sup>-05</sup> | 3.11x10 <sup>-03</sup> | Macrophage |
|     |           |           |          |                               | ILMN_1773389 | <i>PLTP</i>    | -0.3127 | 0.0796  | 9.57x10 <sup>-05</sup> | 6.86x10 <sup>-03</sup> | Macrophage |
|     |           |           |          |                               | ILMN_1711748 | <i>PLTP</i>    | -0.2266 | 0.0587  | 1.27x10 <sup>-04</sup> | 8.82x10 <sup>-03</sup> | Macrophage |
|     |           |           |          |                               | ILMN_2367818 | <i>CD40</i>    | 0.0828  | 0.0245  | 7.75x10 <sup>-04</sup> | 4.08x10 <sup>-02</sup> | Macrophage |
|     |           |           |          |                               | ILMN_1691117 | <i>DNTTIP1</i> | 0.0741  | 0.0109  | 1.95x10 <sup>-11</sup> | 3.13x10 <sup>-09</sup> | Monocyte   |
|     |           |           |          |                               | ILMN_2367818 | <i>CD40</i>    | 0.0752  | 0.0176  | 2.20x10 <sup>-05</sup> | 1.45x10 <sup>-03</sup> | Monocyte   |
|     |           |           |          |                               | ILMN_1779257 | <i>CD40</i>    | 0.1136  | 0.0317  | 3.63x10 <sup>-04</sup> | 1.74x10 <sup>-02</sup> | Monocyte   |
|     |           |           |          |                               |              |                |         |         |                        |                        |            |
| 21  | 39819830  | rs2836411 | 21q22.2  | <i>ERG</i>                    | ILMN_1757074 | <i>GNG10</i>   | -0.0626 | 0.0138  | 6.84x10 <sup>-06</sup> | 5.28x10 <sup>-01</sup> | Monocyte   |

## VALIDATION OF GWAS3D RESULTS USING mRNA EXPRESSION DATA FOR AAA AND CONTROL AORTA

To determine the potential utility of the GWAS3D chromatin state analysis to identify trans interactions, a validation analysis was performed comparing mRNA expression of putative genes in abdominal aortic tissue. Relative mRNA expression profiles of candidate genes, indicated by either SNP proximity (cis-acting regulatory variant) or GWAS3D predicted distal interaction, was derived using the Biros *et al* 2015 (GSE57691) dataset (**Online Table XXIII**). The composition and analysis of this dataset has been previously described<sup>107</sup>. All genes at AAA loci (Table 1) were included in this analysis. Case (49 AAA, including 29 large and 20 small) and control (10 organ donor) abdominal aortic samples were compared using data generated from the Illumina HumanHT-12 V4.0 expression beadchip (GPL10558).

Several of the GWAS3D predicted distal gene interactions appeared to have differential case/ control gene expression (**Online Table XXIII and Online Figure IV**). For example, not only was the mRNA expression of *SORT1* (which is within the locus suggested by rs602633) significantly different between cases and controls, but predicted distal interactions in *BCAR3* and *NOTCH2* also had altered expression. The predicted distal interaction between rs4129267 (*IL6R* locus) and *TDRD10* also appeared concordant with an observed differential gene expression profile. The intergenic SNP rs9316871 (closest gene *LINC0540*) had a predicted interaction with *FGF9* which also had increased expression in AAA versus control aortic tissue.

It should be noted that absence of differential gene expression in this analysis does not specifically preclude a role in AAA pathogenesis. Many genes will have temporal expression and may, for example, only be differentially expressed in specific phases of the pathology. In addition, other genes may have significantly altered expression in other tissues (such as the liver, kidney or circulating leukocytes) the results of which may have indirect effects on the aortic wall. Nevertheless, these results appear to, at least in part, validate the potential utility of chromatin state-based analysis to identify functional mechanisms underlying SNP associations.

**Online Table XXIII:** AAA tissue mRNA expression for genes in close proximity to validated SNPs or having predicted distal gene interactions based on GWAS3D analysis.

| Gene selection criteria                          | Gene          | Locus           | Entrez Gene ID | mRNA p-value               | AAA mRNA expression |
|--------------------------------------------------|---------------|-----------------|----------------|----------------------------|---------------------|
| metaGWAS SNP proximity                           | <b>ANRIL</b>  | <b>9p21.3</b>   | <b>1030</b>    | <b>0.0025</b>              | <b>increased</b>    |
| GWAS3D predicted distal interaction (SORT1)      | <b>BCAR3</b>  | <b>1p22.1</b>   | <b>8412</b>    | <b>1.8x10<sup>-4</sup></b> | <b>decreased</b>    |
| metaGWAS SNP proximity                           | CDKN2A        | 9p21.3          | 1029           | 0.217                      |                     |
| metaGWAS SNP proximity                           | CDKN2BAS1     | 9p21.3          | 100048912      | 0.266                      |                     |
| metaGWAS SNP proximity                           | CELSR2        | 1p13.3          | 1952           | 0.479                      |                     |
| metaGWAS SNP proximity                           | CHRNA2        | 1q21.3          | 1141           | 0.829                      |                     |
| metaGWAS SNP proximity                           | CTSA          | 20q13.12        | 5476           | 0.174                      |                     |
| metaGWAS SNP proximity                           | DAB2IP        | 9q33.1          | 153090         | 0.213                      |                     |
| metaGWAS SNP proximity                           | ERG           | 21q21.3         | 2078           | 0.095                      |                     |
| GWAS3D predicted distal interaction (LINC00540)  | <b>FGF9</b>   | <b>13q11</b>    | <b>2254</b>    | <b>0.002</b>               | <b>increased</b>    |
| metaGWAS SNP proximity                           | IL6R          | 1q21            | 3570           | 0.087                      |                     |
| metaGWAS SNP proximity                           | KANK2         | 19p13.2         | 25959          | 0.132                      |                     |
| metaGWAS SNP proximity                           | LDLR          | 19p13.2         | 3949           | 0.197                      |                     |
| metaGWAS SNP proximity                           | <b>LRP1</b>   | <b>12q13.3</b>  | <b>4035</b>    | <b>0.0084</b>              | <b>decreased</b>    |
| metaGWAS SNP proximity                           | MMP9          | 20q13.12        | 4318           | 0.132                      |                     |
| metaGWAS SNP proximity                           | MYBPHL        | 1p13.3          | 343263         | 0.897                      |                     |
| metaGWAS SNP proximity                           | <b>NAB2</b>   | <b>12q13.3</b>  | <b>4665</b>    | <b>1.1x10<sup>-5</sup></b> | <b>decreased</b>    |
| metaGWAS SNP proximity                           | NEURL2        | 20q13.12        | 140825         | 0.576                      |                     |
| GWAS3D predicted distal interaction (LDLR)       | NEUROG1       | 5q23            | 4762           | 0.138                      |                     |
| GWAS3D predicted distal interaction (SORT1)      | <b>NOTCH2</b> | <b>1p12</b>     | <b>4853</b>    | <b>4.6x10<sup>-7</sup></b> | <b>increased</b>    |
| metaGWAS SNP proximity                           | PCIF1         | 20q13.12        | 63935          | 0.968                      |                     |
| metaGWAS SNP proximity                           | <b>PLTP</b>   | <b>20q13.12</b> | <b>5360</b>    | <b>0.011</b>               | <b>increased</b>    |
| metaGWAS SNP proximity                           | PSRC1         | 1p13.3          | 84722          | 0.440                      |                     |
| metaGWAS SNP proximity                           | SARS          | 1p13.3          | 6301           | 0.095                      |                     |
| GWAS3D predicted distal interaction (LDLR)       | SHANK1        | 19p13.3         | 50944          | 0.567                      |                     |
| metaGWAS SNP proximity                           | SHE           | 1q21.3          | 126669         | 0.396                      |                     |
| metaGWAS SNP proximity                           | SLC12A5       | 20q13.12        | 57468          | 0.329                      |                     |
| metaGWAS SNP proximity                           | SMYD2         | 1q41            | 56950          | 0.317                      |                     |
| metaGWAS SNP proximity                           | <b>SORT1</b>  | <b>1p13.3</b>   | <b>6272</b>    | <b>1.1x10<sup>-4</sup></b> | <b>decreased</b>    |
| metaGWAS SNP proximity                           | SPC24         | 19p13.2         | 147841         | 0.211                      |                     |
| metaGWAS SNP proximity                           | STAT6         | <b>12q13.3</b>  | 6778           | 0.423                      |                     |
| GWAS3D predicted distal interaction (IL6R)       | <b>TDRD10</b> | <b>1q21.3</b>   | <b>126668</b>  | <b>0.006</b>               | <b>increased</b>    |
| GWAS3D predicted distal interaction (IL6R)       | TYW1          | 7q11.21         | 55253          | 0.320                      |                     |
| metaGWAS SNP proximity                           | UBE2Q1        | 1q21.3          | 55585          | 0.157                      |                     |
| GWAS3D predicted distal interaction (CDKN2B-AS1) | <b>UBE2W</b>  | <b>8q21.11</b>  | <b>55284</b>   | <b>0.0292</b>              | <b>increased</b>    |
| metaGWAS SNP proximity                           | ZNF335        | 20q13.12        | 63925          | 0.205                      |                     |
| GWAS3D predicted distal interaction (LDLR)       | ZNF440        | 19p13.2         | 126070         | 0.406                      |                     |
| metaGWAS SNP proximity                           | ZSWIM3        | 20q13.12        | 140831         | 0.235                      |                     |

**Online Figure IV:** Box and whiskers plots of gene expression in AAA tissue and control tissue for genes in close proximity to validated SNPs or having predicted distal gene interactions based on GWAS3D analysis. Significant differences between AAA and controls are highlighted. Gene expression is log base 2, normalized to the 75<sup>th</sup> percentile.

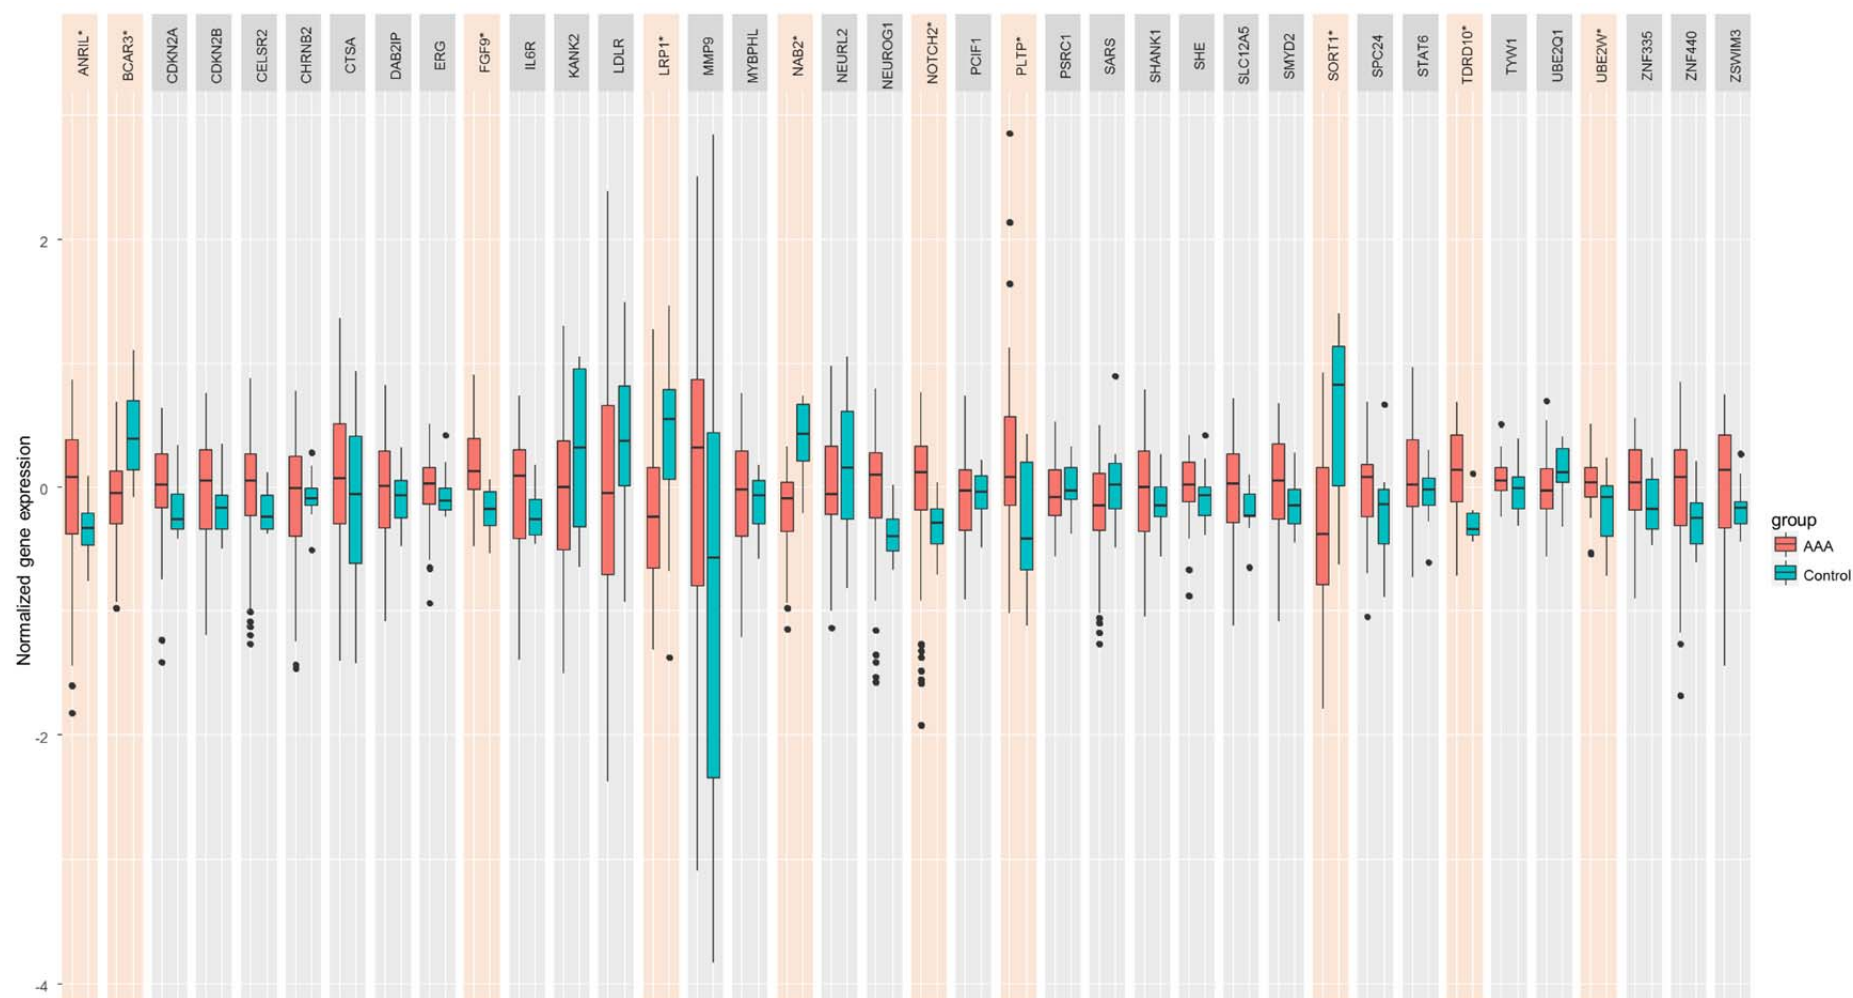

## LOOK-UP FOR TRANSCRIPTION FACTOR BINDING SITES IN GENES HARBORING AAA-ASSOCIATED VARIANTS

We previously performed a chromatin-immunoprecipitation (ChIP) study using AAA and control aorta tissue for the TFs ELF1, ETS2, RUNX1 and STAT5<sup>185</sup>. These TFs were chosen because they were enriched in genes differentially expressed between AAA and control aorta; ELF1, ETS2, and RUNX1 were identified as relevant to most upregulated genes<sup>186</sup> and STAT5 was a driver for genes in the complement cascade<sup>187</sup>.

The TF binding data were obtained from tables published in a paper by Pahl et al.<sup>185</sup>, which describes ChIP-chip for TFs ELF1, ETS2, RUNX1 and STAT5 using human aortic tissue (AAA and control aorta). We performed a lookup in these data for evidence supporting that the genes near the SNPs identified by the meta-GWAS are relevant to AAA pathobiology. Lack of evidence in these data does not preclude involvement in AAA, but presence of evidence is a useful indicator that the gene is likely involved. This is especially useful for genes with little or no annotation in the major databases such as *SMYD2* and *ERG*. The results are summarized in **Online Table XXIV**. Chromatin enriched regions (cher) with binding sites for the TF ETS2 were found in *SMYD2* and *SORT1*. TF STAT5 had binding sites with chers in *CDKN2B-AS1ANRIL*, *ERG* and *DAB2IP*, and TF ELF1 had multiple binding sites in *ERG*. None of the TF binding sites in these genes contained the lead SNPs identified at the AAA risk loci.

**Online Table XXIV:** ChIP-chip data on human aortic tissue for the genes harbouring AAA-associated SNPs. Genome-wide ChIP-chip data were available on 4 transcription factors: ETS2, ELF1, STAT5 and RUNX1. For details, see Pahl et al. 2015<sup>185</sup>. AAA, aortic tissue from abdominal aortic aneurysm; cher, chromatin enriched region; CTL, control abdominal aorta; TFBS, transcription factor binding site as defined by Transfac®.

| SNP        | Chr | Position  | Gene(s)                            | Gene Symbol      | Cher for TF (tissue source) | TFBS in cher   |
|------------|-----|-----------|------------------------------------|------------------|-----------------------------|----------------|
| rs602633   | 1   | 109821511 | <a href="#">PSRC1-CELSR2-SORT1</a> | <i>CELSR2</i>    | None                        |                |
|            |     |           |                                    | <i>SORT1</i>     | ETS2 (CTL)                  | ETS2 (1 site)  |
|            |     |           |                                    | <i>PSRC</i>      | None                        |                |
| rs4129267  | 1   | 154426264 | <a href="#">IL6R</a>               | <i>IL6R</i>      | None                        |                |
| rs1795061  | 1   | 214409280 | <a href="#">SMYD2</a>              | <i>SMYD2</i>     | ETS2 (AAA)                  | ETS2 (4 sites) |
| rs10757274 | 9   | 22096055  | <a href="#">ANRIL</a>              | <i>ANRIL</i>     | STAT5 (CTL)                 | STAT5 (1 site) |
| rs10985349 | 9   | 124425243 | <a href="#">DAB2IP</a>             | <i>DAB2IP</i>    | STAT5 (CTL)                 | STAT5 (1 site) |
| rs9316871  | 13  | 22861921  | <a href="#">LINC00540</a>          | <i>LINC00540</i> | None                        |                |
| rs6511720  | 19  | 11202306  | <a href="#">LDLR</a>               | <i>LDLR</i>      | None                        |                |
| rs3827066  | 20  | 44586023  | <a href="#">PCIF1-ZNF335-MMP9</a>  | <i>PCIF1</i>     | None                        |                |
|            |     |           |                                    | <i>MMP9</i>      | None                        |                |
|            |     |           |                                    | <i>ZNF335</i>    | None                        |                |
| rs2836411  | 21  | 39819830  | <a href="#">ERG</a>                | <i>ERG</i>       | STAT5 (AAA)                 | STAT5 (1 site) |
|            |     |           |                                    |                  | ELF1 (AAA)                  | ELF1 (4 sites) |
|            |     |           |                                    |                  | ELF1 (CTL)                  |                |

## NETWORK ANALYSIS

We investigated whether most of the loci could be connected into a single network through intermediate nodes and interactions. A network integrating most of the loci would suggest mechanisms by which the loci could act in concert, whether synergistically or antagonistically, to affect the phenotype. The network(s) would also provide hypotheses for future investigation. Potential interactions between molecules encoded by genes harboring AAA-associated SNPs were analyzed using two independent analysis tools: Ingenuity Pathway Analysis® (IPA) tool version 9.0 (Qiagen's Ingenuity Systems, Redwood City, CA, USA; [www.ingenuity.com](http://www.ingenuity.com)) and ConsensusPathDB (<http://cpdb.molgen.mpg.de/CPDB>)<sup>188-191</sup>. The analyzed gene set had 14 genes: 2 loci identified by the 9 AAA-associated SNPs included clusters of 3 genes (see **Online Table XIV** for SNP annotations), we also included TNF since recent literature indicated that SMYD2 suppresses IL6 and TNF production<sup>192, 193</sup> and this had been published since the latest database update for each pathway analysis tool used. The gene symbols included in the network analyses were: *CDKN2BAS1*, *CELSR2*, *DAB2IP*, *ERG*, *IL6R*, *LDLR*, *LINC00540*, *MMP9*, *PCIF1*, *PSRC1*, *SMYD2*, *SORT1*, *ZNF335*, and *TNF*.

The parameters for the IPA were: 1. the Ingenuity Knowledge Base was used as a reference set; 2. both direct and indirect relationships were considered; and 3. only relationships that were either experimentally observed or had predictions with high confidence were considered. The relationships displayed as direct interactions mean that the two molecules make physical contact with each other such as binding or phosphorylation, and those displayed as indirect interactions do not require physical contact between the two molecules, such as signaling events. The IPA network generation algorithm has been described previously<sup>194</sup>. The IPA's Core Analysis generated 2 networks, (1) "cardiovascular disease, cellular movement, developmental disorders" ( $P=1 \times 10^{-21}$ ; 8/12 molecules), and (2) "cell signalling, nucleic acid metabolism, small molecular biochemistry" ( $P=1 \times 10^{-7}$ ; 3/12 molecules). We merged the two networks into an interaction figure (**Online Figure V**). This identified that *ERG*, *IL6R* and *LDLR* were predicted modifiers of *MMP9*, with a direct interaction between *ERG* and *MMP9*. *SORT* and *LDLR* appear coupled via *ERK* and *LDL*. *IL6R* affects *DAB2IP* which in turn regulates *NFKB*. Several gene products, such as *ANRIL*, *CELSR2*, *ZNF335* and *SMYD2* have poorly defined functions at present, and *LINC00540*, a long non-coding RNA expressed in the hippocampus and lacking annotation information, did not belong to either of the 2 networks. The long non-coding RNA *ANRIL*, our strongest hit in the genome (**Figure 1**), has been reported in numerous studies as a GWAS hotspot and a candidate gene for CAD, intracranial aneurysms, and diverse cardiometabolic disorders<sup>195</sup>.

The same gene list was submitted to the ConsensusPathDB web-based tool for generating an inferred network. ConsensusPathDB-human integrates interaction networks in *Homo sapiens* including binary and complex protein-protein, genetic, metabolic, signaling, gene regulatory and drug-target interactions, as well as biochemical pathways. Data currently originate from 32 public resources for interactions and interactions that have been curated from the literature. The interaction data are integrated in a manner to avoid redundancies, resulting in an interaction network containing different types of interactions. When the analysis was carried out, the database contained the following annotations: 158,523 unique physical entities; 458,570 unique interactions (17,098 gene regulation, 261,085 protein interaction, 443 genetic, 21,070 biochemical reactions, and 158,874 drug-target interactions), and 4,593 pathways. ConsensusPathDB infers a network to include proteins or metabolites that are not in the user-supplied input list, but associate two or more nodes (gene/protein/metabolite) on the input list with each other. These nodes are termed intermediate nodes and are ranked according to the significance of association with the input nodes given their overall connectivity in the background network. This is quantified by a z-score calculated for each intermediate node with the binomial

proportions test. The default z-score was used. The network was visualized using CytoScape (version 3.4.0).

Four genes from the input list did not map to known entities in ConsensusPathDB: ANRIL and LINC00540 are long non-coding RNAs and not represented; similarly PCIF1 and ZNF335 are poorly annotated and not currently represented in source databases (**Online Figure VI**). The inferred network generated by ConsensusPathDB is largely similar to that produced by IPA, although it lacks the interaction between SMYD2 and IL6R, and SMYD2 and TNF. The absence of these interactions could be due to the recent elucidation as well as the unknown mechanism by which the SMYD2 suppression of TNF and IL6 occurs. The number of interactions of a node is a function of the true number of interactions as well as how well studied the protein or gene is. In the network (**Online Figure VI**) MMP9 and TNF have a large number of interactions. Interestingly LDLR and SMYD2 both have indirect interactions with MMP9 and TNF through CREBP, and could have synergistic effects on the AAA phenotype. Additionally CREBP has an interaction with NFKB complex and ETS1. Inhibition of NFKB and ETS1 was shown to reduce AAA in a rat model<sup>196</sup> and their promoter binding sites were enriched in the promoters of genes upregulated in human AAA<sup>197</sup>.

**Online Figure V. Potential interactions between gene products of AAA related genes.** This figure shows IPA networks 1 and 2 merged together. Molecules are represented as nodes, and the biological relationship between two nodes as a line. Solid lines represent direct and dashed lines indirect interactions. All lines are supported by at least one literature citation or are from canonical information stored in the Ingenuity Pathways Knowledge Base (Qiagen's Ingenuity Systems). Nodes are displayed using various shapes that represent the functional class of the gene product. Molecules in orange are encoded by genes harboring AAA-associated variants. Red dashed lines indicate new information on SMYD2, IL6 and TNF found in recent literature<sup>192, 193</sup>

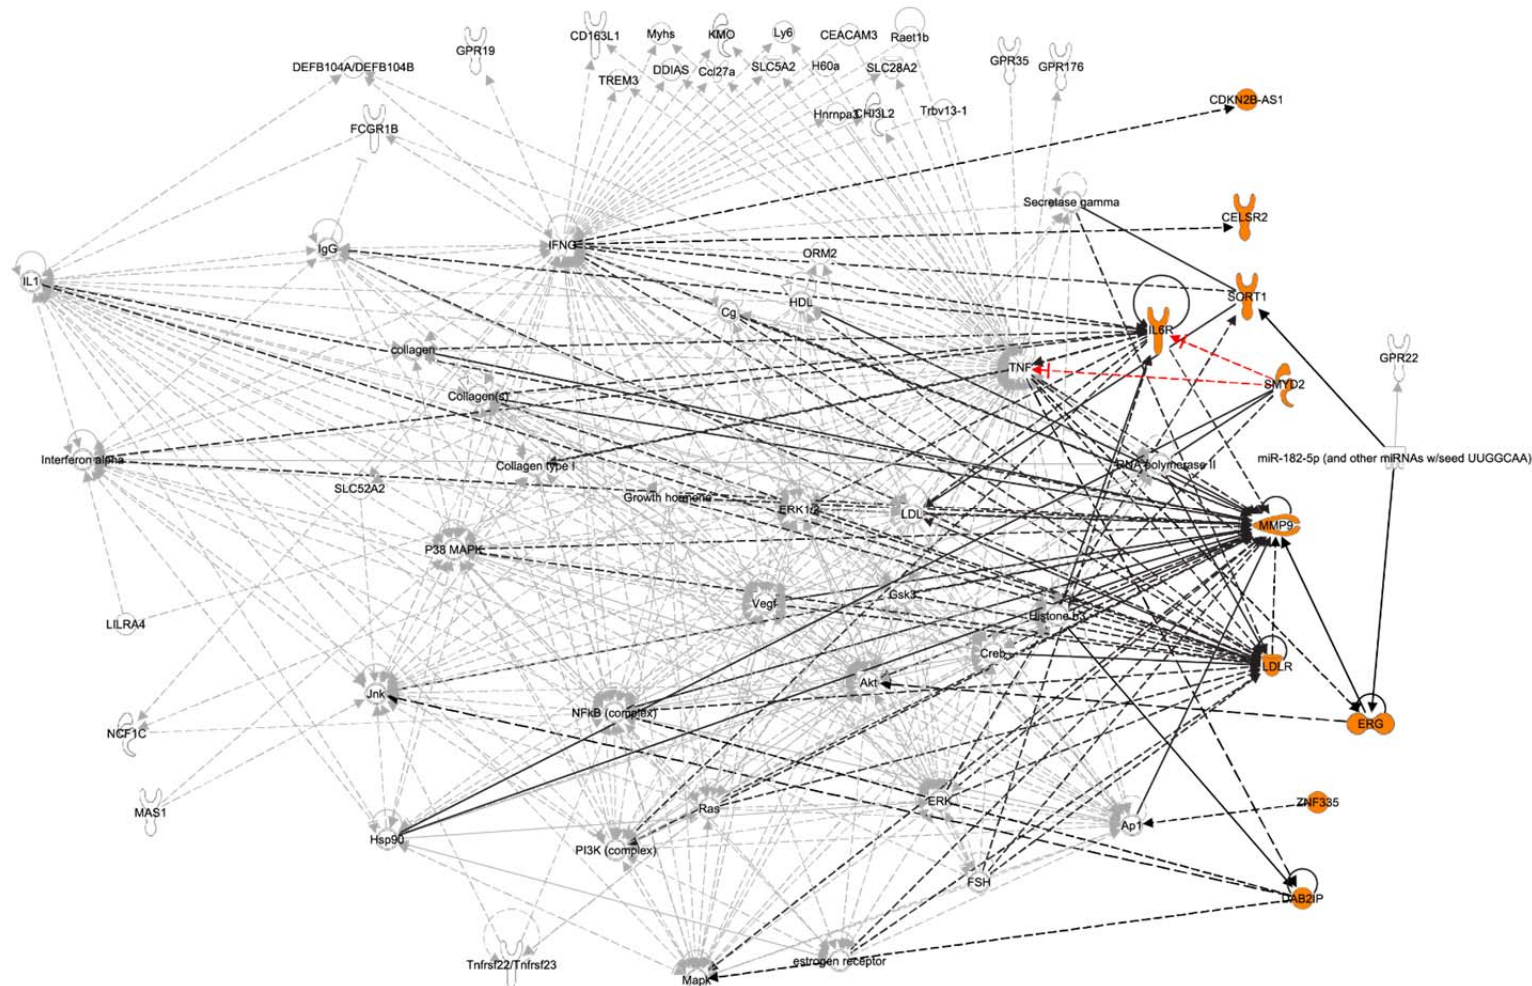

**Online Figure VI: Induced network generated by ConsensusPathDB from 14 input genes.** The network comprises, genes, gene products (proteins), protein complexes, and metabolites, represented as nodes of different colors: pink, protein; light-blue, gene; medium blue, protein complexes; yellow, metabolite; and light green, unknown complex. Node shape indicates whether the node was on the input list: octagons, input list; rhomboids, induced nodes. Interactions are represented as edges, with color indicating interaction type: blue, protein interaction; red, gene regulatory interaction; and green, biochemical interaction.

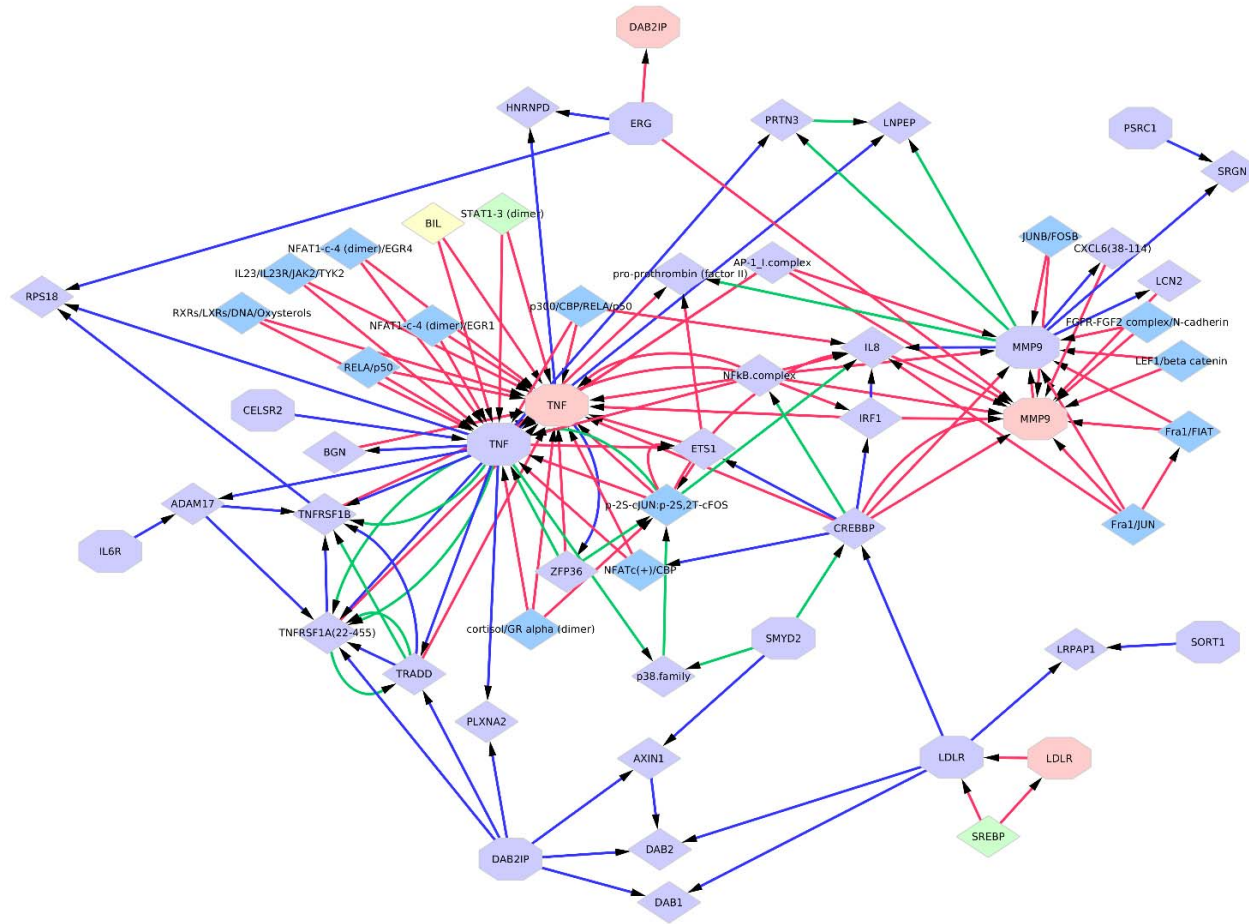

## CONSORTIA CONTRIBUTING DATA

### List of members of the Cardiogenics consortium

Tony Attwood<sup>1</sup>, Stephanie Belz<sup>2</sup>, Peter Braund<sup>3</sup>, Jessy Brocheton<sup>4</sup>, François Cambien<sup>4</sup>, Jason Cooper<sup>5</sup>, Abi Crisp-Hihn<sup>1</sup>, Patrick Diemert (formerly Linsel-Nitschke)<sup>2</sup>, Panos Deloukas<sup>6</sup>, Jeanette Eardman<sup>2</sup>, Nicola Foad<sup>1</sup>, Tiphaine Godefroy<sup>4</sup>, Alison H Goodall<sup>3,11</sup>, Jay Gracey<sup>3</sup>, Emma Gray<sup>6</sup>, Rhian Gwilliams<sup>6</sup>, Susanne Heimerl<sup>7</sup>, Christian Hengstenberg<sup>7</sup>, Jennifer Jolley<sup>1</sup>, Unni Krishnan<sup>3</sup>, Heather Lloyd-Jones<sup>1</sup>, Ulrika Liljedahl<sup>8</sup>, Ingrid Lugauer<sup>7</sup>, Per Lundmark<sup>8</sup>, Seraya Maoouche<sup>2,4</sup>, Jasbir S Moore<sup>3</sup>, Gilles Montalescot<sup>4</sup>, David Muir<sup>1</sup>, Elizabeth Murray<sup>1</sup>, Chris P Nelson<sup>3</sup>, Jessica Neudert<sup>9</sup>, David Niblett<sup>6</sup>, Karen O'Leary<sup>1</sup>, Willem H Ouwehand<sup>1,6</sup>, Helen Pollard<sup>3</sup>, Carole Proust<sup>4</sup>, Angela Rankin<sup>1</sup>, Augusto Rendon<sup>12</sup>, Catherine M Rice<sup>6</sup>, Hendrik B Sager<sup>2</sup>, Nilesh J Samani<sup>3,11</sup>, Jennifer Sambrook<sup>1</sup>, Gerd Schmitz<sup>10</sup>, Michael Scholz<sup>9</sup>, Laura Schroeder<sup>2</sup>, Heribert Schunkert<sup>2</sup>, Jonathan Stephens<sup>1</sup>, Ann-Christine Syvannen<sup>8</sup>, Stefanie Tennstedt (formerly Gulde)<sup>2</sup>, Chris Wallace<sup>5</sup>.

<sup>1</sup>Department of Haematology, University of Cambridge, Long Road, Cambridge, CB2 2PT, UK and National Health Service Blood and Transplant, Cambridge Centre, Long Road, Cambridge, CB2 2PT, UK;

<sup>2</sup>Medizinische Klinik 2, Universität zu Lübeck, Lübeck Germany

<sup>3</sup>Department of Cardiovascular Sciences, University of Leicester, Glenfield Hospital, Groby Road, Leicester, LE3 9QP, UK

<sup>4</sup>INSERM UMR5 937, Pierre and Marie Curie University (UPMC, Paris 6) and Medical School, 91 Bd de l'Hôpital 75013, Paris, France

<sup>5</sup>Juvenile Diabetes Research Foundation/Wellcome Trust Diabetes and Inflammation Laboratory, Department of Medical Genetics, Cambridge Institute for Medical Research, University of Cambridge, Wellcome Trust/MRC Building, Cambridge, CB2 0XY, UK

<sup>6</sup>The Wellcome Trust Sanger Institute, Wellcome Trust Genome Campus, Hinxton, Cambridge CB10 1SA, UK

<sup>7</sup>Klinik und Poliklinik für Innere Medizin II, Universität Regensburg, Germany

<sup>8</sup>Molecular Medicine, Department of Medical Sciences, Uppsala University, Uppsala, Sweden

<sup>9</sup>Trium, Analysis Online GmbH, Hohenlindenerstr. 1, 81677, München, Germany

<sup>10</sup>Institut für Klinische Chemie und Laboratoriumsmedizin, Universität, Regensburg, D-93053 Regensburg, Germany

<sup>11</sup>Leicester NIHR Biomedical Research Unit in Cardiovascular Disease, Glenfield Hospital, Leicester, LE3 9QP, UK

<sup>12</sup>European Bioinformatics Institute, Wellcome Trust Genome Campus, Hinxton, Cambridge, CB10 1SD, UK

### List of members of ICBP: The International Consortium for Blood Pressure Genome-Wide Association Studies<sup>198</sup>

Georg B. Ehret, Patricia B. Munroe, Kenneth M. Rice, Murielle Bochud, Andrew D. Johnson, Daniel I. Chasman, Albert V. Smith, Martin D. Tobin, Germaine C. Verwoert, Shih-Jen Hwang, Vasyl Pihur, Peter Vollenweider, Paul F. O'Reilly, Najaf Amin, Jennifer L. Bragg-Gresham, Alexander Teumer, Nicole L. Glazer, Lenore Launer, Jing Hua Zhao, Yurii Aulchenko, Simon Heath, Siim Söber, Afshin Parsa, Jian'an Luan, Pankaj Arora, Abbas Dehghan, Feng Zhang, Gavin Lucas, Andrew A. Hicks, Anne U. Jackson, John F Peden, Toshiko Tanaka, Sarah H. Wild, Igor Rudan, Wilmar Igl, Yuri Milaneschi, Alex N. Parker, Cristiano Fava, John C. Chambers, Ervin R. Fox, Meena Kumari, Min Jin Go, Pim van der Harst, Wen Hong Linda Kao, Marketa Sjögren, D. G. Vinay, Myriam Alexander, Yasuharu Tabara, Sue Shaw-Hawkins, Peter H. Whincup, Yongmei Liu, Gang Shi, Johanna Kuusisto, Bamidele Tayo, Mark Seielstad, Xueling Sim, Khanh-Dung Hoang Nguyen, Terho Lehtimäki, Giuseppe Matullo, Ying Wu, Tom R. Gaunt, N. Charlotte Onland-

Moret, Matthew N. Cooper, Carl G. P. Platou, Elin Org, Rebecca Hardy, Santosh Dahgam, Jutta Palmen, Veronique Vitart, Peter S. Braund, Tatiana Kuznetsova, Cuno S. P. M. Uiterwaal, Adebowale Adeyemo, Walter Palmas, Harry Campbell, Barbara Ludwig, Maciej Tomaszewski, Ioanna Tzoulaki, Nicholette D. Palmer, CARDIoGRAM consortium, CKDGen Consortium, KidneyGen Consortium, EchoGen consortium, CHARGE-HF consortium, Thor Aspelund, Melissa Garcia, Yen-Pei C. Chang, Jeffrey R. O'Connell, Nanette I. Steinle, Diederick E. Grobbee, Dan E. Arking, Sharon L. Kardia, Alanna C. Morrison, Dena Hernandez, Samer Najjar, Wendy L. McArdle, David Hadley, Morris J. Brown, John M. Connell, Aroon D. Hingorani, Ian N.M. Day, Debbie A. Lawlor, John P. Beilby, Robert W. Lawrence, Robert Clarke, Jemma C. Hopewell, Halit Ongen, Albert W. Dreisbach, Yali Li, J. Hunter Young, Joshua C. Bis, Mika Kähönen, Jorma Viikari, Linda S. Adair, Nanette R. Lee, Ming-Huei Chen, Matthias Olden, Cristian Pattaro, Judith A. Hoffman Bolton, Anna Köttgen, Sven Bergmann, Vincent Mooser, Nish Chaturvedi, Timothy M. Frayling, Muhammad Islam, Tazeen H. Jafar, Jeanette Erdmann, Smita R. Kulkarni, Stefan R. Bornstein, Jürgen Grässler, Leif Groop, Benjamin F. Voight, Johannes Kettunen, Philip Howard, Andrew Taylor, Simonetta Guarrera, Fulvio Ricceri, Valur Emilsson, Andrew Plump, Inês Barroso, Kay-Tee Khaw, Alan B. Weder, Steven C. Hunt, Yan V. Sun, Richard N. Bergman, Francis S. Collins, Lori L. Bonnycastle, Laura J. Scott, Heather M. Stringham, Leena Peltonen, Markus Perola, Erkki Vartiainen, Stefan-Martin Brand, Jan A. Staessen, Thomas J. Wang, Paul R. Burton, Maria Soler Artigas, Yanbin Dong, Harold Snieder, Xiaoling Wang, Haidong Zhu, Kurt K. Lohman, Megan E. Rudock, Susan R. Heckbert, Nicholas L. Smith, Kerri L. Wiggins, Ayo Doumatey, Daniel Shriner, Gudrun Veldre, Margus Viigimaa, Sanjay Kinra, Dorairaj Prabhakaran, Vikal Tripathy, Carl D. Langefeld, Annika Rosengren, Dag S. Thelle, Anna Maria Corsi, Andrew Singleton, Terrence Forrester, Gina Hilton, Colin A. McKenzie, Tunde Salako, Naoharu Iwai, Yoshikuni Kita, Toshio Ogihara, Takayoshi Ohkubo, Tomonori Okamura, Hirotosugu Ueshima, Satoshi Umemura, Susana Eyheramendy, Thomas Meitinger, H.-Erich Wichmann, Yoon Shin Cho, Hyung-Lae Kim, Jong-Young Lee, James Scott, Joban S. Sehmi, Weihua Zhang, Bo Hedblad, Peter Nilsson, George Davey Smith, Andrew Wong, Narisu Narisu, Alena Stančáková, Leslie J. Raffel, Jie Yao, Sekar Kathiresan, Christopher J. O'Donnell, Stephen M. Schwartz, M. Arfan Ikram, W. T. Longstreth Jr, Thomas H. Mosley, Sudha Seshadri, Nick R.G. Shrine, Louise V. Wain, Mario A. Morken, Amy J. Swift, Jaana Laitinen, Inga Prokopenko, Paavo Zitting, Jackie A. Cooper, Steve E. Humphries, John Danesh, Asif Rasheed, Anuj Goel, Anders Hamsten, Hugh Watkins, Stephan J. L. Bakker, Wiek H. van Gilst, Charles S. Janipalli, K. Radha Mani, Chittaranjan S. Yajnik, Albert Hofman, Francesco U. S. Mattace-Raso, Ben A. Oostra, Ayse Demirkan, Aaron Isaacs, Fernando Rivadeneira, Edward G. Lakatta, Marco Orzu, Angelo Scuteri, Mika Ala-Korpela, Antti J. Kangas, Leo-Pekka Lyytikäinen, Pasi Soininen, Taru Tukiainen, Peter Würtz, Rick Twee-Hee Ong, Marcus Dörr, Heyo K. Kroemer, Uwe Völker, Henry Völzke, Pilar Galan, Serge Herberg, Mark Lathrop, Diana Zelenika, Panos Deloukas, Massimo Mangino, Tim D. Spector, Guangju Zhai, James F. Meschia, Michael A. Nalls, Pankaj Sharma, Janos Terzic, M. V. Kranthi Kumar, Matthew Denniff, Ewa Zukowska-Szczechowska, Lynne E. Wagenknecht, F. Gerald R. Fowkes, Fadi J. Charchar, Peter E. H. Schwarz, Caroline Hayward, Xiuqing Guo, Charles Rotimi, Michiel L. Bots, Eva Brand, Nilesh J. Samani, Ozren Polasek, Philippa J. Talmud, Fredrik Nyberg, Diana Kuh, Maris Laan, Kristian Hveem, Lyle J. Palmer, Yvonne T. van der Schouw, Juan P. Casas, Karen L. Mohlke, Paolo Vineis, Olli Raitakari, Santhi K. Ganesh, Tien Y. Wong, E Shyong Tai, Richard S. Cooper, Markku Laakso, Dabeeru C. Rao, Tamara B. Harris, Richard W. Morris, Anna F. Dominiczak, Mika Kivimäki, Michael G. Marmot, Tetsuro Miki, Danish Saleheen, Giriraj R. Chandak, Josef Coresh, Gerjan Navis, Veikko Salomaa, Bok-Ghee Han, Xiaofeng Zhu, Jaspal S. Kooner, Olle Melander, Paul M. Ridker, Stefania Bandinelli, Ulf B. Gyllenstein, Alan F. Wright, James F. Wilson, Luigi Ferrucci, Martin Farrall, Jaakko Tuomilehto, Peter P. Pramstaller, Roberto Elosua, Nicole Soranzo, Eric J. G. Sijbrands, David Altshuler, Ruth J. F. Loos, Alan R. Shuldiner, Christian Gieger, Pierre Meneton, Andre G. Uitterlinden, Nicholas J. Wareham, Vilmundur Gudnason, Jerome I. Rotter, Rainer Rettig, Manuela Uda, David P. Strachan, Jacqueline C. M. Witteman, Anna-Liisa Hartikainen, Jacques S. Beckmann, Eric Boerwinkle, Ramachandran S. Vasan, Michael Boehnke, Martin G. Larson,

Marjo-Riitta Järvelin, Bruce M. Psaty, Gonçalo R. Abecasis, Aravinda Chakravarti, Paul Elliott, Cornelia M. van Duijn, Christopher Newton-Cheh, Daniel Levy, Mark J. Caulfield & Toby Johnson.

## REFERENCES

1. Bown MJ, Jones GT, Harrison SC, et al. Abdominal aortic aneurysm is associated with a variant in low-density lipoprotein receptor-related protein 1. *Am J Hum Genet.* 2011;89:619-627
2. Gretarsdottir S, Baas AF, Thorleifsson G, et al. Genome-wide association study identifies a sequence variant within the *dab2ip* gene conferring susceptibility to abdominal aortic aneurysm. *Nature Genet.* 2010;42:692-U671
3. Jones GT, Bown MJ, Gretarsdottir S, et al. A sequence variant associated with sortilin-1 (*sort1*) on 1p13.3 is independently associated with abdominal aortic aneurysm. *Hum Mol Genet.* 2013
4. Harrison SC, Zabaneh D, Asselbergs FW, et al. A gene-centric study of common carotid artery remodelling. *Atherosclerosis.* 2013;226:440-446
5. Teo YY. Genotype calling for the illumina platform. *Methods Mol Biol.* 2012;850:525-538
6. Purcell S, Neale B, Todd-Brown K, Thomas L, Ferreira MA, Bender D, Maller J, Sklar P, de Bakker PI, Daly MJ, Sham PC. Plink: A tool set for whole-genome association and population-based linkage analyses. *Am J Hum Genet.* 2007;81:559-575
7. Elmore JR, Obmann MA, Kuivaniemi H, Tromp G, Gerhard GS, Franklin DP, Boddy AM, Carey DJ. Identification of a genetic variant associated with abdominal aortic aneurysms on chromosome 3p12.3 by genome wide association. *J Vasc Surg.* 2009;49:1525-1531
8. Borthwick KM, Smelser DT, Bock JA, et al. Ephenotyping for abdominal aortic aneurysm in the electronic medical records and genomics (emerge) network: Algorithm development and konstanz information miner workflow. *Int J Biomed Data Mining.* 2015;4
9. Verma SS, de Andrade M, Tromp G, et al. Imputation and quality control steps for combining multiple genome-wide datasets. *Front Genet.* 2014;5:370
10. Delaneau O, Marchini J, Zagury JF. A linear complexity phasing method for thousands of genomes. *Nat Methods.* 2012;9:179-181
11. Howie B, Fuchsberger C, Stephens M, Marchini J, Abecasis GR. Fast and accurate genotype imputation in genome-wide association studies through pre-phasing. *Nat Genet.* 2012;44:955-959
12. Gretarsdottir S, Thorleifsson G, Reynisdottir ST, et al. The gene encoding phosphodiesterase 4d confers risk of ischemic stroke. *Nat Genet.* 2003;35:131-138
13. Rice JA. Generalized likelihood ratio tests. In: Rice ja, editor. Mathematical statistics and data analysis. Vol. 1. International thomson publishing; 1995. P. 308–310.
14. Rafnar T, Sulem P, Stacey SN, et al. Sequence variants at the *tert-clptm1l* locus associate with many cancer types. *Nat Genet.* 2009;41:221-227
15. Kiemeny LA, Thorlacius S, Sulem P, et al. Sequence variant on 8q24 confers susceptibility to urinary bladder cancer. *Nat Genet.* 2008;40:1307-1312
16. Wetzels JF, Kiemeny LA, Swinkels DW, Willems HL, den Heijer M. Age- and gender-specific reference values of estimated gfr in caucasians: The nijmegen biomedical study. *Kidney Int.* 2007;72:632-637

17. Bown MJ, Braund PS, Thompson J, London NJ, Samani NJ, Sayers RD. Association between the coronary artery disease risk locus on chromosome 9p21.3 and abdominal aortic aneurysm. *Circ Cardiovasc Genet*. 2008;1:39-42
18. Howie B, Marchini J, Stephens M. Genotype imputation with thousands of genomes. *G3 (Bethesda)*. 2011;1:457-470
19. Devlin B, Roeder K. Genomic control for association studies. *Biometrics*. 1999;55:997-1004
20. Shi YY, He L. Shesis, a powerful software platform for analyses of linkage disequilibrium, haplotype construction, and genetic association at polymorphism loci. *Cell Res*. 2005;15:97-98
21. Helgadóttir A, Thorleifsson G, Magnusson KP, et al. The same sequence variant on 9p21 associates with myocardial infarction, abdominal aortic aneurysm and intracranial aneurysm. *Nat Genet*. 2008;40:217-224
22. Ogata T, Shibamura H, Tromp G, Sinha M, Goddard KA, Sakalihasan N, Limet R, MacKean GL, Arthur C, Sueda T, Land S, Kuivaniemi H. Genetic analysis of polymorphisms in biologically relevant candidate genes in patients with abdominal aortic aneurysms. *J Vasc Surg*. 2005;41:1036-1042
23. Gottesman O, Kuivaniemi H, Tromp G, et al. The electronic medical records and genomics (emerge) network: Past, present, and future. *Genet Med*. 2013;15:761-771
24. Ye Z, Kalloo FS, Dalenberg AK, Kullo IJ. An electronic medical record-linked biorepository to identify novel biomarkers for atherosclerotic cardiovascular disease. *Glob Cardiol Sci Pract*. 2013;2013:82-90
25. St Jean PL, Zhang XC, Hart BK, Lamlum H, Webster MW, Steed DL, Henney AM, Ferrell RE. Characterization of a dinucleotide repeat in the 92 kda type iv collagenase gene (clg4b), localization of clg4b to chromosome 20 and the role of clg4b in aortic aneurysmal disease. *Ann Hum Genet*. 1995;59:17-24
26. Pulley J, Clayton E, Bernard GR, Roden DM, Masys DR. Principles of human subjects protections applied in an opt-out, de-identified biobank. *Clin Transl Sci*. 2010;3:42-48
27. McCarty CA, Wilke RA, Giampietro PF, Wesbrook SD, Caldwell MD. Marshfield clinic personalized medicine research project (pmrp): Design, methods and recruitment for a large population-based biobank. *Personalized Medicine*. 2005;2:49-79
28. Tayo BO, Tei M, Tong L, Qin H, Khitrov G, Zhang W, Song Q, Gottesman O, Zhu X, Pereira AC, Cooper RS, Bottinger EP. Genetic background of patients from a university medical center in manhattan: Implications for personalized medicine. *PLoS One*. 2011;6:e19166
29. Kho AN, Hayes MG, Rasmussen-Torvik L, et al. Use of diverse electronic medical record systems to identify genetic risk for type 2 diabetes within a genome-wide association study. *J Am Med Inform Assoc*. 2012;19:212-218
30. Galora S, Saracini C, Pratesi G, Sticchi E, Pulli R, Pratesi C, Abbate R, Giusti B. Association of rs1466535 lrp1 but not rs3019885 slc30a8 and rs6674171 tdrd10 gene polymorphisms with abdominal aortic aneurysm in italian patients. *J Vasc Surg*. 2014
31. Strauss E, Waliszewski K, Oszkini G, Staniszewski R. Polymorphisms of genes involved in the hypoxia signaling pathway and the development of abdominal aortic aneurysms or large-artery atherosclerosis. *J Vasc Surg*. 2015;61:1105-1113.e1103

32. Willer CJ, Li Y, Abecasis GR. Metal: Fast and efficient meta-analysis of genomewide association scans. *Bioinformatics*. 2010;26:2190-2191
33. Han B, Eskin E. Random-effects model aimed at discovering associations in meta-analysis of genome-wide association studies. *Am J Hum Genet*. 2011;88:586-598
34. Morris AP, Voight BF, Teslovich TM, et al. Large-scale association analysis provides insights into the genetic architecture and pathophysiology of type 2 diabetes. *Nat Genet*. 2012;44:981-990
35. Schunkert H, König IR, Kathiresan S, et al. Large-scale association analysis identifies 13 new susceptibility loci for coronary artery disease. *Nat Genet*. 2011;43:333-338
36. Willer CJ, Schmidt EM, Sengupta S, et al. Discovery and refinement of loci associated with lipid levels. *Nat Genet*. 2013;45:1274-1283
37. Wain LV, Verwoert GC, O'Reilly PF, et al. Genome-wide association study identifies six new loci influencing pulse pressure and mean arterial pressure. *Nat Genet*. 2011;43:1005-1011
38. Ramos EM, Hoffman D, Junkins HA, Maglott D, Phan L, Sherry ST, Feolo M, Hindorff LA. Phenotype-genotype integrator (phegini): Synthesizing genome-wide association study (gwas) data with existing genomic resources. *Eur J Hum Genet*. 2014;22:144-147
39. Eicher JD, Landowski C, Stackhouse B, Sloan A, Chen W, Jensen N, Lien JP, Leslie R, Johnson AD. Grasp v2.0: An update on the genome-wide repository of associations between snps and phenotypes. *Nucleic Acids Res*. 2015;43:D799-804
40. Leslie R, O'Donnell CJ, Johnson AD. Grasp: Analysis of genotype-phenotype results from 1390 genome-wide association studies and corresponding open access database. *Bioinformatics*. 2014;30:i185-194
41. Willer CJ, Sanna S, Jackson AU, et al. Newly identified loci that influence lipid concentrations and risk of coronary artery disease. *Nat Genet*. 2008;40:161-169
42. Sandhu MS, Waterworth DM, Debenham SL, et al. Ldl-cholesterol concentrations: A genome-wide association study. *Lancet*. 2008;371:483-491
43. Kathiresan S, Willer CJ, Peloso GM, et al. Common variants at 30 loci contribute to polygenic dyslipidemia. *Nat Genet*. 2009;41:56-65
44. Talmud PJ, Drenos F, Shah S, et al. Gene-centric association signals for lipids and apolipoproteins identified via the human cvd beadchip. *Am J Hum Genet*. 2009;85:628-642
45. Clarke R, Peden JF, Hopewell JC, et al. Genetic variants associated with lp(a) lipoprotein level and coronary disease. *N Engl J Med*. 2009;361:2518-2528
46. Barber MJ, Mangravite LM, Hyde CL, et al. Genome-wide association of lipid-lowering response to statins in combined study populations. *PLoS One*. 2010;5:e9763
47. Teslovich TM, Musunuru K, Smith AV, et al. Biological, clinical and population relevance of 95 loci for blood lipids. *Nature*. 2010;466:707-713
48. Lango Allen H, Estrada K, Lettre G, et al. Hundreds of variants clustered in genomic loci and biological pathways affect human height. *Nature*. 2010;467:832-838
49. Lettre G, Palmer CD, Young T, et al. Genome-wide association study of coronary heart disease and its risk factors in 8,090 african americans: The nhlbi care project. *PLoS Genet*. 2011;7:e1001300

50. Middelberg RP, Ferreira MA, Henders AK, Heath AC, Madden PA, Montgomery GW, Martin NG, Whitfield JB. Genetic variants in *lpl*, *oasl* and *tomm40/apoe-c1-c2-c4* genes are associated with multiple cardiovascular-related traits. *BMC Med Genet.* 2011;12:123
51. Trompet S, de Craen AJ, Postmus I, Ford I, Sattar N, Caslake M, Stott DJ, Buckley BM, Sacks F, Devlin JJ, Slagboom PE, Westendorp RG, Jukema JW. Replication of *ldl* gwas hits in *prosper/phase* as validation for future (pharmaco)genetic analyses. *BMC Med Genet.* 2011;12:131
52. Grallert H, Dupuis J, Bis JC, et al. Eight genetic loci associated with variation in lipoprotein-associated phospholipase a2 mass and activity and coronary heart disease: Meta-analysis of genome-wide association studies from five community-based studies. *Eur Heart J.* 2012;33:238-251
53. Asselbergs FW, Guo Y, van Iperen EP, et al. Large-scale gene-centric meta-analysis across 32 studies identifies multiple lipid loci. *Am J Hum Genet.* 2012;91:823-838
54. Deloukas P, Kanoni S, Willenborg C, et al. Large-scale association analysis identifies new risk loci for coronary artery disease. *Nat Genet.* 2013;45:25-33
55. Wilk JB, Walter RE, Laramie JM, Gottlieb DJ, O'Connor GT. Framingham heart study genome-wide association: Results for pulmonary function measures. *BMC Med Genet.* 2007;8 Suppl 1:S8
56. Ridker PM, Pare G, Parker A, Zee RY, Danik JS, Buring JE, Kwiatkowski D, Cook NR, Miletich JP, Chasman DI. Loci related to metabolic-syndrome pathways including *lepr*, *hnf1a*, *il6r*, and *gckr* associate with plasma c-reactive protein: The women's genome health study. *Am J Hum Genet.* 2008;82:1185-1192
57. Melzer D, Perry JR, Hernandez D, et al. A genome-wide association study identifies protein quantitative trait loci (pqtls). *PLoS Genet.* 2008;4:e1000072
58. Sabatti C, Service SK, Hartikainen AL, et al. Genome-wide association analysis of metabolic traits in a birth cohort from a founder population. *Nat Genet.* 2009;41:35-46
59. Danik JS, Pare G, Chasman DI, Zee RY, Kwiatkowski DJ, Parker A, Miletich JP, Ridker PM. Novel loci, including those related to crohn disease, psoriasis, and inflammation, identified in a genome-wide association study of fibrinogen in 17 686 women: The women's genome health study. *Circ Cardiovasc Genet.* 2009;2:134-141
60. Ferreira MA, Matheson MC, Duffy DL, et al. Identification of *il6r* and chromosome 11q13.5 as risk loci for asthma. *Lancet.* 2011;378:1006-1014
61. Wassel CL, Lange LA, Keating BJ, et al. Association of genomic loci from a cardiovascular gene snp array with fibrinogen levels in european americans and african-americans from six cohort studies: The candidate gene association resource (care). *Blood.* 2011;117:268-275
62. Dehghan A, Dupuis J, Barbalic M, et al. Meta-analysis of genome-wide association studies in >80 000 subjects identifies multiple loci for c-reactive protein levels. *Circulation.* 2011;123:731-738
63. Naitza S, Porcu E, Steri M, et al. A genome-wide association scan on the levels of markers of inflammation in sardinians reveals associations that underpin its complex regulation. *PLoS Genet.* 2012;8:e1002480

64. Reiner AP, Beleza S, Franceschini N, Auer PL, Robinson JG, Kooperberg C, Peters U, Tang H. Genome-wide association and population genetic analysis of c-reactive protein in african american and hispanic american women. *Am J Hum Genet.* 2012;91:502-512
65. Shah T, Zabaneh D, Gaunt T, et al. Gene-centric analysis identifies variants associated with interleukin-6 levels and shared pathways with other inflammation markers. *Circ Cardiovasc Genet.* 2013;6:163-170
66. McPherson R, Pertsemlidis A, Kavaslar N, Stewart A, Roberts R, Cox DR, Hinds DA, Pennacchio LA, Tybjaerg-Hansen A, Folsom AR, Boerwinkle E, Hobbs HH, Cohen JC. A common allele on chromosome 9 associated with coronary heart disease. *Science.* 2007;316:1488-1491
67. Lu X, Wang L, Chen S, et al. Genome-wide association study in han chinese identifies four new susceptibility loci for coronary artery disease. *Nat Genet.* 2012;44:890-894
68. Pechlivanis S, Muhleisen TW, Mohlenkamp S, Schadendorf D, Erbel R, Jockel KH, Hoffmann P, Nothen MM, Scherag A, Moebus S. Risk loci for coronary artery calcification replicated at 9p21 and 6q24 in the heinz nixdorf recall study. *BMC Med Genet.* 2013;14:23
69. Ferguson JF, Matthews GJ, Townsend RR, et al. Candidate gene association study of coronary artery calcification in chronic kidney disease: Findings from the cric study (chronic renal insufficiency cohort). *J Am Coll Cardiol.* 2013;62:789-798
70. Saxena R, Voight BF, Lyssenko V, et al. Genome-wide association analysis identifies loci for type 2 diabetes and triglyceride levels. *Science.* 2007;316:1331-1336
71. Stefansson H, Ophoff RA, Steinberg S, et al. Common variants conferring risk of schizophrenia. *Nature.* 2009;460:744-747
72. Kathiresan S, Melander O, Guiducci C, et al. Six new loci associated with blood low-density lipoprotein cholesterol, high-density lipoprotein cholesterol or triglycerides in humans. *Nat Genet.* 2008;40:189-197
73. Aulchenko YS, Ripatti S, Lindqvist I, et al. Loci influencing lipid levels and coronary heart disease risk in 16 european population cohorts. *Nat Genet.* 2009;41:47-55
74. Chasman DI, Pare G, Zee RY, et al. Genetic loci associated with plasma concentration of low-density lipoprotein cholesterol, high-density lipoprotein cholesterol, triglycerides, apolipoprotein a1, and apolipoprotein b among 6382 white women in genome-wide analysis with replication. *Circ Cardiovasc Genet.* 2008;1:21-30
75. Chasman DI, Pare G, Mora S, et al. Forty-three loci associated with plasma lipoprotein size, concentration, and cholesterol content in genome-wide analysis. *PLoS Genet.* 2009;5:e1000730
76. Bis JC, Kavousi M, Franceschini N, et al. Meta-analysis of genome-wide association studies from the charge consortium identifies common variants associated with carotid intima media thickness and plaque. *Nat Genet.* 2011;43:940-947
77. Large-scale gene-centric analysis identifies novel variants for coronary artery disease. *PLoS Genet.* 2011;7:e1002260
78. Avery CL, He Q, North KE, et al. A phenomics-based strategy identifies loci on apoc1, brap, and plcgl1 associated with metabolic syndrome phenotype domains. *PLoS Genet.* 2011;7:e1002322

79. Musunuru K, Romaine SP, Lettre G, et al. Multi-ethnic analysis of lipid-associated loci: The nhlbi care project. *PLoS One*. 2012;7:e36473
80. Hopewell JC, Parish S, Offer A, Link E, Clarke R, Lathrop M, Armitage J, Collins R. Impact of common genetic variation on response to simvastatin therapy among 18 705 participants in the heart protection study. *Eur Heart J*. 2013;34:982-992
81. Elbers CC, Guo Y, Tragante V, et al. Gene-centric meta-analysis of lipid traits in african, east asian and hispanic populations. *PLoS One*. 2012;7:e50198
82. Weissglas-Volkov D, Aguilar-Salinas CA, Nikkola E, et al. Genomic study in mexicans identifies a new locus for triglycerides and refines european lipid loci. *J Med Genet*. 2013;50:298-308
83. Denny JC, Ritchie MD, Basford MA, Pulley JM, Bastarache L, Brown-Gentry K, Wang D, Masys DR, Roden DM, Crawford DC. Phewas: Demonstrating the feasibility of a phenome-wide scan to discover gene-disease associations. *Bioinformatics*. 2010;26:1205-1210
84. Pendergrass SA, Brown-Gentry K, Dudek S, et al. Phenome-wide association study (phewas) for detection of pleiotropy within the population architecture using genomics and epidemiology (page) network. *PLoS Genet*. 2013;9:e1003087
85. Hsu F, Kent WJ, Clawson H, Kuhn RM, Diekhans M, Haussler D. The ucsc known genes. *Bioinformatics*. 2006;22:1036-1046
86. Benson DA, Karsch-Mizrachi I, Lipman DJ, Ostell J, Wheeler DL. Genbank: Update. *Nucleic Acids Res*. 2004;32:D23-26
87. Kent WJ. Blat--the blast-like alignment tool. *Genome Res*. 2002;12:656-664
88. Pruitt KD, Tatusova T, Maglott DR. Ncbi reference sequence (refseq): A curated non-redundant sequence database of genomes, transcripts and proteins. *Nucleic Acids Res*. 2005;33:D501-504
89. Gardner PP, Daub J, Tate J, Moore BL, Osuch IH, Griffiths-Jones S, Finn RD, Nawrocki EP, Kolbe DL, Eddy SR, Bateman A. Rfam: Wikipedia, clans and the "decimal" release. *Nucleic Acids Res*. 2011;39:D141-145
90. Lowe TM, Eddy SR. Trnascan-se: A program for improved detection of transfer rna genes in genomic sequence. *Nucleic Acids Res*. 1997;25:955-964
91. Reorganizing the protein space at the universal protein resource (uniprot). *Nucleic Acids Res*. 2012;40:D71-75
92. Harrow J, Frankish A, Gonzalez JM, et al. Gencode: The reference human genome annotation for the encode project. *Genome Res*. 2012;22:1760-1774
93. Cabili MN, Trapnell C, Goff L, Koziol M, Tazon-Vega B, Regev A, Rinn JL. Integrative annotation of human large intergenic noncoding rnas reveals global properties and specific subclasses. *Genes Dev*. 2011;25:1915-1927
94. Trapnell C, Williams BA, Pertea G, Mortazavi A, Kwan G, van Baren MJ, Salzberg SL, Wold BJ, Pachter L. Transcript assembly and quantification by rna-seq reveals unannotated transcripts and isoform switching during cell differentiation. *Nat Biotechnol*. 2010;28:511-515
95. Kent WJ, Sugnet CW, Furey TS, Roskin KM, Pringle TH, Zahler AM, Haussler D. The human genome browser at ucsc. *Genome Res*. 2002;12:996-1006

96. Friedman RC, Farh KK, Burge CB, Bartel DP. Most mammalian mRNAs are conserved targets of microRNAs. *Genome Res.* 2009;19:92-105
97. Grimson A, Farh KK, Johnston WK, Garrett-Engle P, Lim LP, Bartel DP. MicroRNA targeting specificity in mammals: Determinants beyond seed pairing. *Mol Cell.* 2007;27:91-105
98. Mortazavi A, Williams BA, McCue K, Schaeffer L, Wold B. Mapping and quantifying mammalian transcriptomes by RNA-seq. *Nat Methods.* 2008;5:621-628
99. Ernst J, Kheradpour P, Mikkelsen TS, Shores N, Ward LD, Epstein CB, Zhang X, Wang L, Issner R, Coyne M, Ku M, Durham T, Kellis M, Bernstein BE. Mapping and analysis of chromatin state dynamics in nine human cell types. *Nature.* 2011;473:43-49
100. An integrated encyclopedia of DNA elements in the human genome. *Nature.* 2012;489:57-74
101. Wang J, Zhuang J, Iyer S, et al. Sequence features and chromatin structure around the genomic regions bound by 119 human transcription factors. *Genome Res.* 2012;22:1798-1812
102. Wang J, Zhuang J, Iyer S, Lin XY, Greven MC, Kim BH, Moore J, Pierce BG, Dong X, Virgil D, Birney E, Hung JH, Weng Z. Factorbook.Org: A wiki-based database for transcription factor-binding data generated by the ENCODE consortium. *Nucleic Acids Res.* 2013;41:D171-176
103. Hubisz MJ, Pollard KS, Siepel A. Phast and rPhast: Phylogenetic analysis with space/time models. *Brief Bioinform.* 2011;12:41-51
104. Jurka J. Repbase update: A database and an electronic journal of repetitive elements. *Trends Genet.* 2000;16:418-420
105. Reumers J, Conde L, Medina I, Maurer-Stroh S, Van Durme J, Dopazo J, Rousseau F, Schymkowitz J. Joint annotation of coding and non-coding single nucleotide polymorphisms and mutations in the snpEff and PupaSuite databases. *Nucleic Acids Res.* 2008;36:D825-829
106. Li MJ, Wang LY, Xia Z, Sham PC, Wang J. Gwas3d: Detecting human regulatory variants by integrative analysis of genome-wide associations, chromosome interactions and histone modifications. *Nucleic Acids Res.* 2013;41:W150-158
107. Biros E, Gabel G, Moran CS, Schreurs C, Lindeman JH, Walker PJ, Nataatmadja M, West M, Holdt LM, Hinterseher I, Pilarsky C, Golledge J. Differential gene expression in human abdominal aortic aneurysm and aortic occlusive disease. *Oncotarget.* 2015;6:12984-12996
108. Pers TH, Karjalainen JM, Chan Y, et al. Biological interpretation of genome-wide association studies using predicted gene functions. *Nat Commun.* 2015;6:5890
109. Zhang X, Gierman HJ, Levy D, Plump A, Dobrin R, Goring HH, Curran JE, Johnson MP, Blangero J, Kim SK, O'Donnell CJ, Emilsson V, Johnson AD. Synthesis of 53 tissue and cell line expression QTL datasets reveals master eQTLs. *BMC Genomics.* 2014;15:532
110. Goring HH, Curran JE, Johnson MP, et al. Discovery of expression QTLs using large-scale transcriptional profiling in human lymphocytes. *Nat Genet.* 2007;39:1208-1216
111. Idaghdour Y, Czika W, Shianna KV, Lee SH, Visscher PM, Martin HC, Miclaus K, Jadallah SJ, Goldstein DB, Wolfinger RD, Gibson G. Geographical genomics of human leukocyte gene expression variation in southern Morocco. *Nat Genet.* 2010;42:62-67

112. Heap GA, Trynka G, Jansen RC, Bruinenberg M, Swertz MA, Dinesen LC, Hunt KA, Wijmenga C, Vanheel DA, Franke L. Complex nature of snp genotype effects on gene expression in primary human leucocytes. *BMC Med Genomics*. 2009;2:1
113. Battle A, Mostafavi S, Zhu X, Potash JB, Weissman MM, McCormick C, Haudenschild CD, Beckman KB, Shi J, Mei R, Urban AE, Montgomery SB, Levinson DF, Koller D. Characterizing the genetic basis of transcriptome diversity through rna-sequencing of 922 individuals. *Genome Res*. 2014;24:14-24
114. Benton MC, Lea RA, Macartney-Coxson D, Carless MA, Goring HH, Bellis C, Hanna M, Eccles D, Chambers GK, Curran JE, Harper JL, Blangero J, Griffiths LR. Mapping eqtls in the norfolk island genetic isolate identifies candidate genes for cvd risk traits. *Am J Hum Genet*. 2013;93:1087-1099
115. Emilsson V, Thorleifsson G, Zhang B, et al. Genetics of gene expression and its effect on disease. *Nature*. 2008;452:423-428
116. Fehrmann RS, Jansen RC, Veldink JH, et al. Trans-eqtls reveal that independent genetic variants associated with a complex phenotype converge on intermediate genes, with a major role for the hla. *PLoS Genet*. 2011;7:e1002197
117. Landmark-Hoyvik H, Dumeaux V, Nebdal D, Lund E, Tost J, Kamatani Y, Renault V, Borresen-Dale AL, Kristensen V, Edvardsen H. Genome-wide association study in breast cancer survivors reveals snps associated with gene expression of genes belonging to mhc class i and ii. *Genomics*. 2013;102:278-287
118. Mehta D, Heim K, Herder C, Carstensen M, Eckstein G, Schurmann C, Homuth G, Nauck M, Volker U, Roden M, Illig T, Gieger C, Meitinger T, Prokisch H. Impact of common regulatory single-nucleotide variants on gene expression profiles in whole blood. *Eur J Hum Genet*. 2013;21:48-54
119. Narahara M, Higasa K, Nakamura S, Tabara Y, Kawaguchi T, Ishii M, Matsubara K, Matsuda F, Yamada R. Large-scale east-asian eqtl mapping reveals novel candidate genes for ld mapping and the genomic landscape of transcriptional effects of sequence variants. *PLoS One*. 2014;9:e100924
120. Quinlan J, Idaghdour Y, Goulet JP, Gbeha E, de Malliard T, Bruat V, Grenier JC, Gomez S, Sanni A, Rahimy MC, Awadalla P. Genomic architecture of sickle cell disease in west african children. *Front Genet*. 2014;5:26
121. Sasayama D, Hori H, Nakamura S, Miyata R, Teraishi T, Hattori K, Ota M, Yamamoto N, Higuchi T, Amano N, Kunugi H. Identification of single nucleotide polymorphisms regulating peripheral blood mrna expression with genome-wide significance: An eqtl study in the japanese population. *PLoS One*. 2013;8:e54967
122. Schramm K, Marzi C, Schurmann C, et al. Mapping the genetic architecture of gene regulation in whole blood. *PLoS One*. 2014;9:e93844
123. van Eijk KR, de Jong S, Boks MP, Langeveld T, Colas F, Veldink JH, de Kovel CG, Janson E, Strengman E, Langfelder P, Kahn RS, van den Berg LH, Horvath S, Ophoff RA. Genetic analysis of DNA methylation and gene expression levels in whole blood of healthy human subjects. *BMC Genomics*. 2012;13:636
124. Westra HJ, Peters MJ, Esko T, et al. Systematic identification of trans eqtls as putative drivers of known disease associations. *Nat Genet*. 2013;45:1238-1243

125. Wright FA, Sullivan PF. Heritability and genomics of gene expression in peripheral blood. 2014;46:430-437
126. Zhernakova DV, de Klerk E, Westra HJ, et al. Deepsage reveals genetic variants associated with alternative polyadenylation and expression of coding and non-coding transcripts. *PLoS Genet.* 2013;9:e1003594
127. Dixon AL, Liang L, Moffatt MF, Chen W, Heath S, Wong KC, Taylor J, Burnett E, Gut I, Farrall M, Lathrop GM, Abecasis GR, Cookson WO. A genome-wide association study of global gene expression. *Nat Genet.* 2007;39:1202-1207
128. Liang L, Morar N, Dixon AL, Lathrop GM, Abecasis GR, Moffatt MF, Cookson WO. A cross-platform analysis of 14,177 expression quantitative trait loci derived from lymphoblastoid cell lines. *Genome Res.* 2013;23:716-726
129. Stranger BE, Nica AC, Forrest MS, Dimas A, Bird CP, Beazley C, Ingle CE, Dunning M, Flicek P, Koller D, Montgomery S, Tavaré S, Deloukas P, Dermitzakis ET. Population genomics of human gene expression. *Nat Genet.* 2007;39:1217-1224
130. Kwan T, Benovoy D, Dias C, Gurd S, Provencher C, Beaulieu P, Hudson TJ, Sladek R, Majewski J. Genome-wide analysis of transcript isoform variation in humans. *Nat Genet.* 2008;40:225-231
131. Bryois J, Buil A, Evans DM, Kemp JP, Montgomery SB, Conrad DF, Ho KM, Ring S, Hurles M, Deloukas P, Davey Smith G, Dermitzakis ET. Cis and trans effects of human genomic variants on gene expression. *PLoS Genet.* 2014;10:e1004461
132. Cusanovich DA, Billstrand C, Zhou X, Chavarria C, De Leon S, Michelini K, Pai AA, Ober C, Gilad Y. The combination of a genome-wide association study of lymphocyte count and analysis of gene expression data reveals novel asthma candidate genes. *Hum Mol Genet.* 2012;21:2111-2123
133. Dimas AS, Deutsch S, Stranger BE, et al. Common regulatory variation impacts gene expression in a cell type-dependent manner. *Science.* 2009;325:1246-1250
134. Grundberg E, Small KS, Hedman AK, et al. Mapping cis- and trans-regulatory effects across multiple tissues in twins. *Nat Genet.* 2012;44:1084-1089
135. Gutierrez-Arcelus M, Lappalainen T, Montgomery SB, et al. Passive and active DNA methylation and the interplay with genetic variation in gene regulation. *Elife.* 2013;2:e00523
136. Mangravite LM, Engelhardt BE, Medina MW, et al. A statin-dependent qtl for *gatm* expression is associated with statin-induced myopathy. *Nature.* 2013;502:377-380
137. Fairfax BP, Makino S, Radhakrishnan J, Plant K, Leslie S, Dilthey A, Ellis P, Langford C, Vannberg FO, Knight JC. Genetics of gene expression in primary immune cells identifies cell type-specific master regulators and roles of hla alleles. *Nat Genet.* 2012;44:502-510
138. Murphy A, Chu JH, Xu M, et al. Mapping of numerous disease-associated expression polymorphisms in primary peripheral blood cd4+ lymphocytes. *Hum Mol Genet.* 2010;19:4745-4757
139. Heinzen EL, Ge D, Cronin KD, Maia JM, Shianna KV, Gabriel WN, Welsh-Bohmer KA, Hulet CM, Denny TN, Goldstein DB. Tissue-specific genetic control of splicing: Implications for the study of complex traits. *PLoS Biol.* 2008;6:e1
140. Zeller T, Wild P, Szymczak S, et al. Genetics and beyond--the transcriptome of human monocytes and disease susceptibility. *PLoS One.* 2010;5:e10693

141. Fairfax BP, Humburg P, Makino S, Naranbhai V, Wong D, Lau E, Jostins L, Plant K, Andrews R, McGee C, Knight JC. Innate immune activity conditions the effect of regulatory variants upon monocyte gene expression. *Science*. 2014;343:1246949
142. Barreiro LB, Tailleux L, Pai AA, Gicquel B, Marioni JC, Gilad Y. Deciphering the genetic architecture of variation in the immune response to mycobacterium tuberculosis infection. *Proc Natl Acad Sci U S A*. 2012;109:1204-1209
143. Lee MN, Ye C, Villani AC, et al. Common genetic variants modulate pathogen-sensing responses in human dendritic cells. *Science*. 2014;343:1246980
144. Huang RS, Gamazon ER, Ziliak D, Wen Y, Im HK, Zhang W, Wing C, Duan S, Bleibel WK, Cox NJ, Dolan ME. Population differences in microRNA expression and biological implications. *RNA Biol*. 2011;8:692-701
145. Degner JF, Pai AA, Pique-Regi R, Veyrieras JB, Gaffney DJ, Pickrell JK, De Leon S, Michelini K, Lewellen N, Crawford GE, Stephens M, Gilad Y, Pritchard JK. DNase I sensitivity QTLs are a major determinant of human expression variation. *Nature*. 2012;482:390-394
146. The genotype-tissue expression (GTEx) project. *Nat Genet*. 2013;45:580-585
147. Greenawalt DM, Dobrin R, Chudin E, et al. A survey of the genetics of stomach, liver, and adipose gene expression from a morbidly obese cohort. *Genome Res*. 2011;21:1008-1016
148. Kompass KS, Witte JS. Co-regulatory expression quantitative trait loci mapping: Method and application to endometrial cancer. *BMC Med Genomics*. 2011;4:6
149. Li Q, Seo JH, Stranger B, McKenna A, Pe'er I, Laframboise T, Brown M, Tyekucheva S, Freedman ML. Integrative eQTL-based analyses reveal the biology of breast cancer risk loci. *Cell*. 2013;152:633-641
150. Chen TH, D'Ambrosio D, Gallins P, et al. Mapping of hepatic expression quantitative trait loci (eQTLs) in a Han Chinese population. *Nat Genet*. 2014;51:319-326
151. Innocenti F, Cooper GM, Stanaway IB, et al. Identification, replication, and functional fine-mapping of expression quantitative trait loci in primary human liver tissue. *PLoS Genet*. 2011;7:e1002078
152. Schadt EE, Molony C, Chudin E, et al. Mapping the genetic architecture of gene expression in human liver. *PLoS Biol*. 2008;6:e107
153. Schroder A, Klein K, Winter S, Schwab M, Bonin M, Zell A, Zanger UM. Genomics of ADME gene expression: Mapping expression quantitative trait loci relevant for absorption, distribution, metabolism and excretion of drugs in human liver. *Pharmacogenomics J*. 2013;13:12-20
154. Grundberg E, Kwan T, Ge B, et al. Population genomics in a disease targeted primary cell model. *Genome Res*. 2009;19:1942-1952
155. Kabachiev B, Silverberg MS. Expression quantitative trait loci analysis identifies associations between genotype and gene expression in human intestine. *Gastroenterology*. 2013;144:1488-1496, 1496.e1481-1483
156. Ongen H, Andersen CL, Bramsen JB, et al. Putative cis-regulatory drivers in colorectal cancer. *Nature*. 2014;512:87-90
157. Keildson S, Fadista J, Ladenvall C, et al. Expression of phosphofructokinase in skeletal muscle is influenced by genetic variation and associated with insulin sensitivity. *Diabetes*. 2014;63:1154-1165

158. Curtis C, Shah SP, Chin SF, et al. The genomic and transcriptomic architecture of 2,000 breast tumours reveals novel subgroups. *Nature*. 2012;486:346-352
159. Quigley DA, Fiorito E, Nord S, et al. The 5p12 breast cancer susceptibility locus affects mrps30 expression in estrogen-receptor positive tumors. *Mol Oncol*. 2014;8:273-284
160. Gao C, Tignor NL, Salit J, Strulovici-Barel Y, Hackett NR, Crystal RG, Mezey JG. Heft: EqtI analysis of many thousands of expressed genes while simultaneously controlling for hidden factors. *Bioinformatics*. 2014;30:369-376
161. Hao K, Bosse Y, Nickle DC, et al. Lung eqtls to help reveal the molecular underpinnings of asthma. *PLoS Genet*. 2012;8:e1003029
162. Ding J, Gudjonsson JE, Liang L, Stuart PE, Li Y, Chen W, Weichenthal M, Ellinghaus E, Franke A, Cookson W, Nair RP, Elder JT, Abecasis GR. Gene expression in skin and lymphoblastoid cells: Refined statistical method reveals extensive overlap in cis-eqtl signals. *Am J Hum Genet*. 2010;87:779-789
163. Wagner JR, Busche S, Ge B, Kwan T, Pastinen T, Blanchette M. The relationship between DNA methylation, genetic and expression inter-individual variation in untransformed human fibroblasts. *Genome Biol*. 2014;15:R37
164. Qiu W, Cho MH, Riley JH, et al. Genetics of sputum gene expression in chronic obstructive pulmonary disease. *PLoS One*. 2011;6:e24395
165. Fadista J, Vikman P, Laakso EO, et al. Global genomic and transcriptomic analysis of human pancreatic islets reveals novel genes influencing glucose metabolism. *Proc Natl Acad Sci U S A*. 2014;111:13924-13929
166. Koopmann TT, Adriaens ME, Moerland PD, et al. Genome-wide identification of expression quantitative trait loci (eqtls) in human heart. *PLoS One*. 2014;9:e97380
167. Lin H, Dolmatova EV, Morley MP, Lunetta KL, McManus DD, Magnani JW, Margulies KB, Hakonarson H, del Monte F, Benjamin EJ, Cappola TP, Ellinor PT. Gene expression and genetic variation in human atria. *Heart Rhythm*. 2014;11:266-271
168. Rantalainen M, Herrera BM, Nicholson G, et al. MicroRNA expression in abdominal and gluteal adipose tissue is associated with mRNA expression levels and partly genetically driven. *PLoS One*. 2011;6:e27338
169. Gamazon ER, Innocenti F, Wei R, Wang L, Zhang M, Mirkov S, Ramirez J, Huang RS, Cox NJ, Ratain MJ, Liu W. A genome-wide integrative study of microRNAs in human liver. *BMC Genomics*. 2013;14:395
170. Li Q, Stram A, Chen C, Kar S, Gayther S, Pharoah P, Haiman C, Stranger B, Kraft P, Freedman ML. Expression qtl-based analyses reveal candidate causal genes and loci across five tumor types. *Hum Mol Genet*. 2014;23:5294-5302
171. Webster JA, Gibbs JR, Clarke J, et al. Genetic control of human brain transcript expression in Alzheimer disease. *Am J Hum Genet*. 2009;84:445-458
172. Zou F, Chai HS, Younkin CS, et al. Brain expression genome-wide association study (egwas) identifies human disease-associated variants. *PLoS Genet*. 2012;8:e1002707
173. Ramasamy A, Trabzuni D, Guelfi S, Varghese V, Smith C, Walker R, De T, Coin L, de Silva R, Cookson MR, Singleton AB, Hardy J, Ryten M, Weale ME. Genetic variability in the regulation of gene expression in ten regions of the human brain. *Nat Neurosci*. 2014;17:1418-1428

174. Gamazon ER, Badner JA, Cheng L, et al. Enrichment of cis-regulatory gene expression snps and methylation quantitative trait loci among bipolar disorder susceptibility variants. *Mol Psychiatry*. 2013;18:340-346
175. Gibbs JR, van der Brug MP, Hernandez DG, et al. Abundant quantitative trait loci exist for DNA methylation and gene expression in human brain. *PLoS Genet*. 2010;6:e1000952
176. Kim S, Cho H, Lee D, Webster MJ. Association between snps and gene expression in multiple regions of the human brain. *Transl Psychiatry*. 2012;2:e113
177. Zhang B, Gaiteri C, Bodea LG, et al. Integrated systems approach identifies genetic nodes and networks in late-onset alzheimer's disease. *Cell*. 2013;153:707-720
178. Shpak M, Hall AW, Goldberg MM, Derryberry DZ, Ni Y, Iyer VR, Cowperthwaite MC. An eqtl analysis of the human glioblastoma multiforme genome. *Genomics*. 2014;103:252-263
179. Colantuoni C, Lipska BK, Ye T, Hyde TM, Tao R, Leek JT, Colantuoni EA, Elkahoul AG, Herman MM, Weinberger DR, Kleinman JE. Temporal dynamics and genetic control of transcription in the human prefrontal cortex. *Nature*. 2011;478:519-523
180. Liu C, Cheng L, Badner JA, Zhang D, Craig DW, Redman M, Gershon ES. Whole-genome association mapping of gene expression in the human prefrontal cortex. *Mol Psychiatry*. 2010;15:779-784
181. Folkersen L, van't Hooft F, Chernogubova E, Agardh HE, Hansson GK, Hedin U, Liska J, Syvanen AC, Paulsson-Berne G, Franco-Cereceda A, Hamsten A, Gabrielsen A, Eriksson P. Association of genetic risk variants with expression of proximal genes identifies novel susceptibility genes for cardiovascular disease. *Circ Cardiovasc Genet*. 2010;3:365-373
182. Björkegren JLM, Kovacic JC, Dudley JT, Schadt EE. Genome-wide significant loci: How important are they?: Systems genetics to understand heritability of coronary artery disease and other common complex disorders. *J Am Coll Cardiol*. 2015;65:830-845
183. Garnier S, Truong V, Brocheton J, et al. Genome-wide haplotype analysis of cis expression quantitative trait loci in monocytes. *PLoS Genet*. 2013;9:e1003240
184. Heinig M, Petretto E, Wallace C, et al. A trans-acting locus regulates an anti-viral expression network and type 1 diabetes risk. *Nature*. 2010;467:460-464
185. Pahl MC, Erdman R, Kuivaniemi H, Lillvis JH, Elmore JR, Tromp G. Transcriptional (chip-chip) analysis of elf1, ets2, runx1 and stat5 in human abdominal aortic aneurysm. *Int J Mol Sci*. 2015;16:11229-11258
186. Lenk GM, Tromp G, Weinsheimer S, Gatalica Z, Berguer R, Kuivaniemi H. Whole genome expression profiling reveals a significant role for immune function in human abdominal aortic aneurysms. *BMC Genomics*. 2007;8:237
187. Hinterseher I, Erdman R, Donoso LA, et al. Role of complement cascade in abdominal aortic aneurysms. *ATVB*. 2011;31:1653-1660
188. Kamburov A, Pentchev K, Galicka H, Wierling C, Lehrach H, Herwig R. Consensuspathdb: Toward a more complete picture of cell biology. *Nucleic Acids Res*. 2011;39:D712-717
189. Kamburov A, Stelzl U, Lehrach H, Herwig R. The consensuspathdb interaction database: 2013 update. *Nucleic Acids Res*. 2013;41:D793-800

190. Kamburov A, Wierling C, Lehrach H, Herwig R. Consensuspathdb--a database for integrating human functional interaction networks. *Nucleic Acids Res.* 2009;37:D623-628
191. Pentchev K, Ono K, Herwig R, Ideker T, Kamburov A. Evidence mining and novelty assessment of protein-protein interactions with the consensuspathdb plugin for cytoscape. *Bioinformatics.* 2010;26:2796-2797
192. Nguyen H, Allali-Hassani A, Antonysamy S, et al. Lly-507, a cell-active, potent, and selective inhibitor of protein-lysine methyltransferase smyd2. *J Biol Chem.* 2015;290:13641-13653
193. Xu G, Liu G, Xiong S, Liu H, Chen X, Zheng B. The histone methyltransferase smyd2 is a negative regulator of macrophage activation by suppressing interleukin 6 (il-6) and tumor necrosis factor alpha (tnf-alpha) production. *J Biol Chem.* 2015;290:5414-5423
194. Calvano SE, Xiao W, Richards DR, et al. A network-based analysis of systemic inflammation in humans. *Nature.* 2005;437:1032-1037
195. Hannou SA, Wouters K, Paumelle R, Staels B. Functional genomics of the cdkn2a/b locus in cardiovascular and metabolic disease: What have we learned from gwass? *Trends Endocrinol Metab.* 2015;26:176-184
196. Nakashima H, Aoki M, Miyake T, Kawasaki T, Iwai M, Jo N, Oishi M, Kataoka K, Ohgi S, Ogihara T, Kaneda Y, Morishita R. Inhibition of experimental abdominal aortic aneurysm in the rat by use of decoy oligodeoxynucleotides suppressing activity of nuclear factor kappaB and ets transcription factors. *Circulation.* 2004;109:132-138
197. Nischan J, Gatalica Z, Curtis M, Lenk GM, Tromp G, Kuivaniemi H. Binding sites for ets family of transcription factors dominate the promoter regions of differentially expressed genes in abdominal aortic aneurysms. *Circ Cardiovasc Genet.* 2009;2:565-572
198. Genetic variants in novel pathways influence blood pressure and cardiovascular disease risk. *Nature.* 2011;478:103-109
